# Supplementary material for: A Quantitative Proteomics View on the Function of Qfhb1, a Major QTL for Fusarium Head Blight Resistance in Wheat
Source: MDPI journal article supplement (doi:10.3390/pathogens7030058), 2018-06-22
Supplement: s1 [file s1]

Supplementary Table S2. Fold changes of the proteins identified by 2D-DIGE and MALDI-MS/MS analyses within and between the resistant (fbb1+) and susceptible (fbb1-) NILs before and after Fusarium graminearum infection.

| Protein ID | Annotation                                                                                                         | The fbb1- control/<br>the fbb1+ control | The fbb1- infected/<br>the fbb1- control | The fbb1- infected/<br>the fbb1+ control | The fbb1- infected/<br>the fbb1- control | The fbb1- infected/<br>the fbb1+ control | The fbb1- infected/<br>the fbb1- control | The fbb1- infected/<br>the fbb1+ infected |
|------------|--------------------------------------------------------------------------------------------------------------------|-----------------------------------------|------------------------------------------|------------------------------------------|------------------------------------------|------------------------------------------|------------------------------------------|-------------------------------------------|
| 1*         | Glycosyltransferase [Triticum aestivum] / Pm3 [Triticum aestivum]                                                  | -1.71                                   | -1.18                                    | -1.43                                    | 1.44                                     | 1.19                                     | -1.21                                    |                                           |
| 2          | Ribulose biphosphate carboxylase small chain PW9                                                                   | -1.20                                   | 1.35                                     | 1.50                                     | 1.62                                     | 1.80                                     | 1.11                                     |                                           |
| 3*         | Glycosyltransferase [Triticum aestivum] / MYB-related protein [Triticum aestivum]                                  | 1.01                                    | 1.49                                     | 1.69                                     | 1.47                                     | 1.68                                     | 1.14                                     |                                           |
| 4          | COP9 signalosome subunit [Chlamydomonas reinhardtii]                                                               | -1.05                                   | 1.12                                     | 1.45                                     | 1.18                                     | 1.52                                     | 1.29                                     |                                           |
| 5          | Predicted protein [Hordeum vulgare subsp. vulgare]                                                                 | -1.04                                   | 1.34                                     | 1.51                                     | 1.39                                     | 1.56                                     | 1.13                                     |                                           |
| 6          | Predicted protein [Micromonas sp. RCC299]                                                                          | 1.07                                    | 2.27                                     | 1.32                                     | 2.13                                     | 1.24                                     | -1.72                                    |                                           |
| 7          | Eukaryotic translation initiation factor 3 subunit D-like [Brachypodium distachyon], predicted                     | 1.12                                    | 1.92                                     | 1.18                                     | 1.71                                     | 1.05                                     | -1.62                                    |                                           |
| 8          | Methionine synthase 1 enzyme                                                                                       | -1.10                                   | 1.25                                     | 1.39                                     | 1.37                                     | 1.52                                     | 1.11                                     |                                           |
| 9          | Phenylalanine ammonia-lyase                                                                                        | -1.26                                   | 1.36                                     | 1.59                                     | 1.72                                     | 2.01                                     | 1.17                                     |                                           |
| 10         | Adenosylhomocysteinase                                                                                             | -1.10                                   | 1.29                                     | 1.38                                     | 1.42                                     | 1.52                                     | 1.07                                     |                                           |
| 11         | S-methyltetrahydropteroyliriglutamate-homocysteine methyltransferase-like [Brachypodium distachyon], predicted     | -1.49                                   | 2.28                                     | 1.43                                     | 3.40                                     | 2.14                                     | -1.59                                    |                                           |
| 12         | Phenylalanine ammonia-lyase                                                                                        | -1.57                                   | 1.40                                     | 1.72                                     | 2.19                                     | 2.69                                     | 1.23                                     |                                           |
| 13*        | Mechanosensitive ion channel / PPR domain containing protein / Serine/threonine protein kinase [Triticum aestivum] | -1.21                                   | 2.51                                     | 1.23                                     | 3.03                                     | 1.48                                     | -2.05                                    |                                           |
| 14         | Ribulose-1,5-bisphosphate carboxylase/oxygenase large subunit                                                      | -1.44                                   | 1.60                                     | 1.93                                     | 2.32                                     | 2.78                                     | 1.20                                     |                                           |
| 15         | Ribulose-1,5-bisphosphate carboxylase/oxygenase large subunit                                                      | -1.29                                   | 1.52                                     | 1.89                                     | 1.96                                     | 2.43                                     | 1.24                                     |                                           |
| 16         | Protein disulfide isomerase                                                                                        | 1.74                                    | -1.10                                    | 1.13                                     | -1.92                                    | -1.53                                    | 1.25                                     |                                           |
| 17         | Protein phosphatase 2A structural subunit                                                                          | 1.63                                    | -1.07                                    | 1.11                                     | -1.75                                    | -1.47                                    | 1.18                                     |                                           |
| 18         | Glucose-1-phosphate adenylyltransferase large subunit, chloroplastic/amyloplastic (Fragment)                       | 1.07                                    | 1.60                                     | 1.25                                     | 1.50                                     | 1.17                                     | -1.28                                    |                                           |
| 19         | Starch synthase IIa-3                                                                                              | 1.43                                    | 1.18                                     | 2.00                                     | -1.22                                    | 1.40                                     | 1.70                                     |                                           |
| 20         | Phosphoethanolamine methyltransferase                                                                              | 1.87                                    | 1.23                                     | 1.05                                     | -1.52                                    | -1.78                                    | -1.18                                    |                                           |
| 21         | Alpha tubulin-2A                                                                                                   | -1.34                                   | 1.31                                     | -1.19                                    | 1.76                                     | 1.13                                     | -1.56                                    |                                           |
| 22         | Alpha tubulin-2A                                                                                                   | 1.10                                    | 1.32                                     | 2.11                                     | 1.20                                     | 1.92                                     | 1.60                                     |                                           |
| 23         | Mitochondrial-processing peptidase subunit beta-like [Brachypodium distachyon], predicted                          | -1.36                                   | 1.24                                     | 1.23                                     | 1.68                                     | 1.66                                     | -1.01                                    |                                           |
| 24         | Myo-inositol-1-phosphate synthase                                                                                  | -2.51                                   | 1.20                                     | 1.37                                     | 3.02                                     | 3.43                                     | 1.14                                     |                                           |
| 25         | 5,10-methylene-tetrahydrofolate reductase                                                                          | -1.16                                   | 1.18                                     | 1.39                                     | 1.37                                     | 1.61                                     | 1.17                                     |                                           |
| 26         | Atp1                                                                                                               | -1.13                                   | 1.29                                     | 1.46                                     | 1.46                                     | 1.65                                     | 1.13                                     |                                           |
| 27         | Phosphoglucosyltransferase                                                                                         | -1.12                                   | 1.40                                     | 1.54                                     | 1.56                                     | 1.72                                     | 1.10                                     |                                           |
| 28         | Phosphoglucosyltransferase                                                                                         | -1.03                                   | 1.36                                     | 1.54                                     | 1.41                                     | 1.60                                     | 1.13                                     |                                           |
| 29         | Phosphoglucosyltransferase                                                                                         | -1.03                                   | 1.27                                     | 1.57                                     | 1.32                                     | 1.62                                     | 1.23                                     |                                           |
| 30         | Ribulose-1,5-bisphosphate carboxylase/oxygenase large subunit                                                      | -1.35                                   | -1.12                                    | -1.54                                    | 1.21                                     | -1.14                                    | -1.37                                    |                                           |
| 31         | Heat shock protein HSP26                                                                                           | 1.11                                    | 1.22                                     | 1.52                                     | 1.10                                     | 1.37                                     | 1.25                                     |                                           |
| 32         | Plastid glutamine synthetase 2                                                                                     | -1.05                                   | -1.26                                    | -1.51                                    | -1.20                                    | -1.44                                    | -1.20                                    |                                           |
| 33         | Predicted protein [Hordeum vulgare subsp. vulgare]                                                                 | 1.22                                    | -1.76                                    | -1.63                                    | -2.14                                    | -1.99                                    | 1.08                                     |                                           |
| 34         | Glutamine synthetase isoform Gsr1                                                                                  | 1.45                                    | -1.06                                    | -1.10                                    | -1.53                                    | -1.59                                    | -1.04                                    |                                           |
| 35         | Actin [Triticum aestivum]                                                                                          | -1.44                                   | 1.63                                     | 1.55                                     | 2.34                                     | 2.23                                     | -1.05                                    |                                           |
| 36         | S-adenosylmethionine synthase                                                                                      | -1.20                                   | 1.26                                     | 1.32                                     | 1.52                                     | 1.60                                     | 1.05                                     |                                           |
| 37         | S-adenosylmethionine synthase                                                                                      | -1.49                                   | 1.32                                     | 1.36                                     | 1.97                                     | 2.03                                     | 1.03                                     |                                           |
| 38         | S-adenosylmethionine synthase                                                                                      | -1.44                                   | 1.40                                     | 1.61                                     | 2.02                                     | 2.32                                     | 1.15                                     |                                           |
| 39         | Caffeic acid 3-O-methyltransferase                                                                                 | -1.33                                   | 1.06                                     | 1.23                                     | 1.41                                     | 1.64                                     | 1.16                                     |                                           |
| 40         | Caffeic acid 3-O-methyltransferase                                                                                 | -1.36                                   | 1.10                                     | 1.26                                     | 1.50                                     | 1.72                                     | 1.15                                     |                                           |
| 41         | Fructokinase-1-like [Brachypodium distachyon], predicted                                                           | -1.07                                   | 1.43                                     | 1.23                                     | 1.53                                     | 1.32                                     | -1.16                                    |                                           |
| 42         | Os08g0130500 [Oryza sativa Japonica Group]                                                                         | -1.36                                   | 1.46                                     | 1.29                                     | 1.98                                     | 1.76                                     | -1.13                                    |                                           |
| 43         | Stearoyl-ACP desaturase [Triticum aestivum]                                                                        | -1.29                                   | -1.11                                    | -1.84                                    | 1.17                                     | -1.42                                    | -1.66                                    |                                           |
| 44         | Uncharacterized protein LOC100273160 [Zea mays]                                                                    | -1.03                                   | 1.65                                     | 1.29                                     | 1.69                                     | 1.33                                     | -1.27                                    |                                           |
| 45         | Malate dehydrogenase 1, mitochondrial-like [Brachypodium distachyon], predicted                                    | -1.23                                   | 1.04                                     | 1.25                                     | 1.28                                     | 1.54                                     | 1.20                                     |                                           |
| 46         | Isopentenyl pyrophosphate isomerase                                                                                | 1.07                                    | -1.41                                    | -1.26                                    | -1.51                                    | -1.36                                    | 1.11                                     |                                           |
| 47         | Uncharacterized protein LOC100822602 [Brachypodium distachyon], predicted                                          | -1.86                                   | -1.33                                    | -1.52                                    | 1.40                                     | 1.23                                     | -1.14                                    |                                           |
| 48         | NADPH: isoflavone reductase [Glycine max]                                                                          | -1.40                                   | 1.09                                     | -1.00                                    | 1.53                                     | 1.39                                     | -1.10                                    |                                           |
| 49*        | Root phototropism 2 [Oryza sativa Japonica Group], putative, expressed                                             | -1.27                                   | -1.59                                    | -1.49                                    | -1.25                                    | -1.17                                    | 1.07                                     |                                           |
| 50         | Group 5/9 grass pollen allergen R8-S [Triticum turgidum subsp. durum x Secale cereale]                             | -1.37                                   | 1.69                                     | 1.41                                     | 2.31                                     | 1.93                                     | -1.20                                    |                                           |
| 51         | Chlorophyll a-b binding protein of LHCII type III, chloroplastic-like [Brachypodium distachyon], predicted         | 1.01                                    | -1.39                                    | -1.49                                    | -1.41                                    | -1.51                                    | -1.07                                    |                                           |
| 52         | Vacuolar invertase                                                                                                 | -1.87                                   | 1.11                                     | -1.15                                    | 2.07                                     | 1.62                                     | -1.27                                    |                                           |
| 53         | Translationally-controlled tumor protein                                                                           | 1.02                                    | -1.65                                    | -1.92                                    | -1.69                                    | -1.96                                    | -1.16                                    |                                           |
| 54         | Predicted protein [Hordeum vulgare subsp. vulgare]                                                                 | -1.03                                   | -1.55                                    | -1.71                                    | -1.50                                    | -1.66                                    | -1.11                                    |                                           |
| 55         | Chloroplast light-harvesting chlorophyll a/b binding protein                                                       | 1.01                                    | -1.50                                    | -1.65                                    | -1.52                                    | -1.67                                    | -1.10                                    |                                           |
| 56         | Adenylate kinase, chloroplastic-like                                                                               | 1.15                                    | -1.12                                    | -1.34                                    | -1.29                                    | -1.54                                    | -1.19                                    |                                           |
| 57         | Chlorophyll a-b binding protein                                                                                    | 1.12                                    | 1.03                                     | -1.60                                    | -1.09                                    | -1.79                                    | -1.64                                    |                                           |
| 58         | Chlorophyll a-b binding protein CP24 10A, chloroplastic [Glycine max], predicted                                   | 1.04                                    | -1.53                                    | -1.67                                    | -1.60                                    | -1.74                                    | -1.09                                    |                                           |
| 59         | Chlorophyll a-b binding protein 8 [Zea mays]                                                                       | 1.05                                    | -1.22                                    | -1.60                                    | -1.28                                    | -1.67                                    | -1.31                                    |                                           |
| 60         | bZIP transcription factor                                                                                          | -1.11                                   | 1.38                                     | 1.29                                     | 1.53                                     | 1.43                                     | -1.07                                    |                                           |
| 61         | Oxygen-evolving enhancer protein 2, chloroplastic                                                                  | -1.05                                   | -1.15                                    | -1.63                                    | -1.09                                    | -1.55                                    | -1.42                                    |                                           |
| 62         | Glutathione transferase F5                                                                                         | 1.57                                    | 1.08                                     | -1.01                                    | -1.46                                    | -1.58                                    | -1.08                                    |                                           |
| 63*        | P450 / Abseic acid-induced protein [Triticum aestivum] / Mlo protein [Triticum aestivum]                           | 1.31                                    | -1.19                                    | 1.02                                     | -1.56                                    | -1.28                                    | 1.21                                     |                                           |
| 64         | Salt tolerant protein                                                                                              | 2.88                                    | 1.09                                     | 1.02                                     | -2.63                                    | -2.84                                    | -1.08                                    |                                           |
| 65         | MYB-related protein                                                                                                | 1.11                                    | -1.88                                    | -1.86                                    | -2.07                                    | -2.06                                    | 1.01                                     |                                           |
| 66         | Thioredoxin-dependent peroxidase [Leymus chinensis]                                                                | 1.10                                    | -1.07                                    | -1.47                                    | -1.17                                    | -1.62                                    | -1.38                                    |                                           |
| 67         | Eukaryotic translation initiation factor 5A1                                                                       | -1.85                                   | 1.14                                     | -1.97                                    | 2.11                                     | -1.06                                    | -2.24                                    |                                           |
| 68         | Eukaryotic translation initiation factor 5A1                                                                       | 1.29                                    | -1.05                                    | -1.29                                    | -1.36                                    | -1.66                                    | -1.22                                    |                                           |
| 69         | Cytochrome b6-f complex iron-sulfur subunit                                                                        | -2.19                                   | -1.10                                    | -2.31                                    | 2.00                                     | -1.05                                    | -2.10                                    |                                           |
| 70         | ASR1 protein [Solanum peruvianum]                                                                                  | -1.25                                   | -1.52                                    | -1.63                                    | -1.22                                    | -1.31                                    | -1.07                                    |                                           |
| 71         | Peroxisome oxidase 2E-2, chloroplastic-like [Brachypodium distachyon], predicted                                   | 1.20                                    | 1.15                                     | -1.32                                    | -1.04                                    | -1.59                                    | -1.52                                    |                                           |
| 72         | Pathogenesis related protein 10                                                                                    | 1.05                                    | 2.22                                     | 2.15                                     | 2.11                                     | 2.04                                     | -1.03                                    |                                           |
| 73         | Thioredoxin M-type                                                                                                 | 1.16                                    | -1.24                                    | -1.58                                    | -1.44                                    | -1.83                                    | -1.27                                    |                                           |
| 74         | Ribulose biphosphate carboxylase small chain clone 512 (Fragment)                                                  | 1.13                                    | -1.30                                    | -1.41                                    | -1.47                                    | -1.59                                    | -1.08                                    |                                           |
| 75         | Ribulose-1,5-bisphosphate carboxylase/oxygenase small subunit                                                      | -1.33                                   | -1.15                                    | -1.68                                    | 1.15                                     | -1.26                                    | -1.45                                    |                                           |
| 76         | Profilin                                                                                                           | -1.19                                   | 1.60                                     | 1.58                                     | 1.91                                     | 1.88                                     | -1.02                                    |                                           |
| 77         | Thylakoid lumenal protein 1 [Vitis vinifera], predicted                                                            | 1.14                                    | -1.28                                    | -1.64                                    | -1.46                                    | -1.86                                    | -1.27                                    |                                           |
| 78         | Vacuolar ATPase subunit F [Triticum aestivum]                                                                      | 1.04                                    | -1.40                                    | -1.67                                    | -1.45                                    | -1.74                                    | -1.20                                    |                                           |
| 79         | Ribulose biphosphate carboxylase small chain clone 512                                                             | -1.71                                   | 1.05                                     | -1.68                                    | 1.79                                     | 1.02                                     | -1.76                                    |                                           |
| 80*        | 60S ribosomal protein L5 / Ent-kaurene synthase like 1 / Thylakoid-bound ascorbate peroxidase                      | -6.87                                   | 3.53                                     | 2.85                                     | 24.26                                    | 19.54                                    | -1.24                                    |                                           |

\* Protein with no confidence; Red indicates differentially accumulated proteins.
