# Supplementary material for: A Quantitative Proteomics View on the Function of Qfhb1, a Major QTL for Fusarium Head Blight Resistance in Wheat
Source: MDPI journal article supplement (doi:10.3390/pathogens7030058), 2018-06-22
Supplement: s1 [file s1]

|   |                                                                                                                                                                                                                                                                                                                                                                                                                                                                                                                                                                                                                                                                                                                                                                                                                                                                                                                                             |                                                                                                   |              |          |       |    |       |        |       |        |
|---|---------------------------------------------------------------------------------------------------------------------------------------------------------------------------------------------------------------------------------------------------------------------------------------------------------------------------------------------------------------------------------------------------------------------------------------------------------------------------------------------------------------------------------------------------------------------------------------------------------------------------------------------------------------------------------------------------------------------------------------------------------------------------------------------------------------------------------------------------------------------------------------------------------------------------------------------|---------------------------------------------------------------------------------------------------|--------------|----------|-------|----|-------|--------|-------|--------|
|   | 1                                                                                                                                                                                                                                                                                                                                                                                                                                                                                                                                                                                                                                                                                                                                                                                                                                                                                                                                           | COP9 signalosome subunit [Chlamydomonas reinhardtii]                                              | gi 159463648 | 50437.8  | 6.03  | 16 | 72    | 92.684 |       |        |
|   | 2                                                                                                                                                                                                                                                                                                                                                                                                                                                                                                                                                                                                                                                                                                                                                                                                                                                                                                                                           | Hypothetical protein Osl_02271 [Oryza sativa Indica group]                                        | gi 218188383 | 14361.2  | 6.99  | 7  | 63    | 47.002 | 11    | 0      |
|   | 3                                                                                                                                                                                                                                                                                                                                                                                                                                                                                                                                                                                                                                                                                                                                                                                                                                                                                                                                           | Maturase K [Jacqueshuberia brevipes]                                                              | gi 183529139 | 59996.3  | 9.28  | 13 | 61    | 21.61  |       |        |
|   | 4                                                                                                                                                                                                                                                                                                                                                                                                                                                                                                                                                                                                                                                                                                                                                                                                                                                                                                                                           | PREDICTED: DEAD-box ATP-dependent RNA helicase 36-like [Glycine max]                              | gi 356528665 | 66719.2  | 9.12  | 14 | 61    | 16.003 |       |        |
|   | 5                                                                                                                                                                                                                                                                                                                                                                                                                                                                                                                                                                                                                                                                                                                                                                                                                                                                                                                                           | RNA polymerase beta subunit (chloroplast) [Olea europaea]                                         | gi 283794960 | 120754.7 | 8.23  | 16 | 56    | 0      | 13    | 0      |
|   | 6                                                                                                                                                                                                                                                                                                                                                                                                                                                                                                                                                                                                                                                                                                                                                                                                                                                                                                                                           | PREDICTED: pentatricopeptide repeat-containing protein At4g37170-like [Glycine max]               | gi 356547226 | 78764.6  | 8.02  | 15 | 54    | 0      |       |        |
|   | 7                                                                                                                                                                                                                                                                                                                                                                                                                                                                                                                                                                                                                                                                                                                                                                                                                                                                                                                                           | Minichromosome maintenance protein 4 [Volvox carteri f. nagariensis]                              | gi 302845553 | 108094.9 | 6.11  | 8  | 54    | 0      | 37    | 27.737 |
|   | 8                                                                                                                                                                                                                                                                                                                                                                                                                                                                                                                                                                                                                                                                                                                                                                                                                                                                                                                                           | Chloroplast Mg-chelatase subunit XANTHA-G precursor [Hordeum vulgare]                             | gi 71493349  | 82619.1  | 5.52  | 15 | 53    | 0      |       |        |
|   | 9                                                                                                                                                                                                                                                                                                                                                                                                                                                                                                                                                                                                                                                                                                                                                                                                                                                                                                                                           | Maturase-like protein [Leucaena retusa]                                                           | gi 37518612  | 59801.3  | 9.41  | 12 | 52    | 0      |       |        |
|   | 10                                                                                                                                                                                                                                                                                                                                                                                                                                                                                                                                                                                                                                                                                                                                                                                                                                                                                                                                          | Unknown protein; 70672-76070 [Arabidopsis thaliana]                                               | gi 12324587  | 104123.1 | 4.79  | 17 | 52    | 0      |       |        |
| 5 | MDLPKEIFLKDYKKPDYLFDTVDLEFQLGDEKTIIVTSNIAVSPGNEGTSPLALNGRDLLKLSIKINGTELKSDKYTVDPRLHILTTPAGVFNMIEIVTEIYPQLNTSLEGLYRSTGNFCTQCEAEGFRKITYFQD<br>RPDVMAYKTCRIEGDKTLYPVLLSNGNLIEQGDLEGGKHYALWEDPFFKPCYLFALVAGQLECREDSFVTCGRKVTLRITWPAQDLPKTSHAMYSLEAMKWDEEVFGLYDLDLFNIVVVPDFNMGMAM<br>ENKSLNVFQSRVLVASPEAATDGDYAAAILGVIGHEYFHNWNTGNRVTCRDWFQTLTKEGLTVFRDQEFSSDLGCRVTVKRIADVSKLRSYQFPQDAGPMAHPRLPSYIKMDNFYTVTVYEKGAEVVRMYKTM<br>LGASGFRKGMDLYFQRHDGQAVTCEDFYAAAMCDANNAQLPNFLQWYSQAGTPTVKATSSYDEGSQTFSLKLSQEVPPTPGPMKEPMFIPVAVGLVDSTGEDMPLTSIYSDGMVQTLSDNGHPVFTTVLQF<br>KKTEEEFIFNNVPERPVPVPSLLRGYSAPIRLDSLDTESDLYFLLANDSDEFNRWEAGQILARKLMFSLVADFQQQKTLALNTKFVDGLRAILRSTSLDKEFIAKAITLPGQGEIMDMMSIADPDVAHVAVRTFIKKE<br>LAFQLKDDLLAAVTSNRSEAYVFNHDSVARRALKNTCLAYLASLNEPDVTELALNEYKSATNMTEQFAALAALSQNPQGVREDALLDFYNKWQQDYLVVSKWFALQATSDIPGNVANVRKLLAHPAFDM<br>DNNKVVSLICGCGCSVSEHAKDCSCVFLCEVVLQLDKINPOVASRMVSAESPWRBYDETQALAKAOLEMISANGLSNNVFLASKSLAA |                                                                                                   |              |          |       |    |       |        |       |        |
|   | 1                                                                                                                                                                                                                                                                                                                                                                                                                                                                                                                                                                                                                                                                                                                                                                                                                                                                                                                                           | Predicted protein [Hordeum vulgare subsp. vulgare]                                                | gi 326503600 | 99426.8  | 5.17  | 17 | 204   | 100    | 141   | 100    |
|   | 2                                                                                                                                                                                                                                                                                                                                                                                                                                                                                                                                                                                                                                                                                                                                                                                                                                                                                                                                           | PREDICTED: pentatricopeptide repeat-containing protein At4g37170-like [Glycine max]               | gi 356547226 | 78764.6  | 8.02  | 12 | 66    | 70.875 | 30    | 0      |
|   | 3                                                                                                                                                                                                                                                                                                                                                                                                                                                                                                                                                                                                                                                                                                                                                                                                                                                                                                                                           | Heat shock protein 70, mitochondrial precursor [Micromonas pusilla CCMP1545]                      | gi 303275878 | 78601.4  | 6.08  | 7  | 62    | 31.725 | 49    | 94.836 |
|   | 4                                                                                                                                                                                                                                                                                                                                                                                                                                                                                                                                                                                                                                                                                                                                                                                                                                                                                                                                           | Katanin p80 WD40 repeat-containing subunit B1 homolog 1-like [Brachypodium distachyon], predicted | gi 357162659 | 103217.7 | 8.24  | 16 | 59    | 0      | 11    | 0      |
|   | 5                                                                                                                                                                                                                                                                                                                                                                                                                                                                                                                                                                                                                                                                                                                                                                                                                                                                                                                                           | Hypothetical protein VOLCADRAFT_120430 [Volvox carteri f. nagariensis]                            | gi 302831071 | 48086.5  | 6.82  | 9  | 56    | 0      | 22.00 | 0      |
|   | 6                                                                                                                                                                                                                                                                                                                                                                                                                                                                                                                                                                                                                                                                                                                                                                                                                                                                                                                                           | Hypothetical protein MTR_5g089990 [Medicago truncatula]                                           | gi 357494001 | 9860.8   | 6.03  | 7  | 54    | 0      |       |        |
|   | 7                                                                                                                                                                                                                                                                                                                                                                                                                                                                                                                                                                                                                                                                                                                                                                                                                                                                                                                                           | Hypothetical protein VITISV_020021 [Vitis vinifera]                                               | gi 147787791 | 116094.5 | 9.51  | 17 | 53    | 0      |       |        |
|   | 8                                                                                                                                                                                                                                                                                                                                                                                                                                                                                                                                                                                                                                                                                                                                                                                                                                                                                                                                           | Maturase K                                                                                        | gi 68052514  | 59985.5  | 9.47  | 12 | 53    | 0      |       |        |
|   | 9                                                                                                                                                                                                                                                                                                                                                                                                                                                                                                                                                                                                                                                                                                                                                                                                                                                                                                                                           | Predicted protein [Chlamydomonas reinhardtii]                                                     | gi 159485182 | 23517.2  | 11.18 | 9  | 50    | 0      |       |        |
|   | 10                                                                                                                                                                                                                                                                                                                                                                                                                                                                                                                                                                                                                                                                                                                                                                                                                                                                                                                                          | Predicted protein [Physcomitrella patens subsp. patens]                                           | gi 168058449 | 35660.3  | 8.54  | 10 | 48    | 0      |       |        |
| 6 | MASSAPSRRAAASLLASLRAVTPATRCNPAPVPSTRAFDRRGFASWASTPSPASGVAWMTRSVKELKDAARAQMDAAKVAPERLKSAAARESRRRLASALGPRAAESIMSGTSLNPATHARNLTLRARAFR<br>FRHRAPAAVAGAGATCATYGAAGAAERLRGRGDDDAQRLDATSKLATLALSAGCVAAAATYLRARSVDPERVHAAMRRLERHPGLCEVLGAPLVSEHRAVVTTGGVWTSRTYTPRFRDAKVHMAF<br>RVAGTRKLGLVTVEAKKRKA WG GVRASWHHFIGGDPHEYALVAVDVAADNGDEHRVYLAGGSERYAKQGEVTGMHMRALVSVASEAYEAEQRGEEAEEDERLRREKAEARAEAPKPLDKGGGMWP<br>AERVTDYVAQKRHEAAREVTKLGVAADARK                                                                                                                                                                                                                                                                                                                                                                                                                                                                                                   |                                                                                                   |              |          |       |    |       |        |       |        |
|   | 1                                                                                                                                                                                                                                                                                                                                                                                                                                                                                                                                                                                                                                                                                                                                                                                                                                                                                                                                           | Predicted protein [Micromonas sp. RCC299]                                                         | gi 255083775 | 44954.3  | 10.40 | 4  | 66    | 71.538 | 56    | 99.166 |
|   | 2                                                                                                                                                                                                                                                                                                                                                                                                                                                                                                                                                                                                                                                                                                                                                                                                                                                                                                                                           | Intron-binding protein aquarius [Brachypodium distachyon], predicted                              | gi 357112007 | 179208.8 | 5.47  | 22 | 57    | 0      |       |        |
|   | 3                                                                                                                                                                                                                                                                                                                                                                                                                                                                                                                                                                                                                                                                                                                                                                                                                                                                                                                                           | Hypothetical protein ARALYDRAFT_894344 [Arabidopsis lyrata subsp. lyrata]                         | gi 297841293 | 33755.1  | 8.19  | 11 | 54    | 0      |       |        |
|   | 4                                                                                                                                                                                                                                                                                                                                                                                                                                                                                                                                                                                                                                                                                                                                                                                                                                                                                                                                           | RNA polymerase beta' subunit protein [Meliosma aff. cuneifolia Moore 333]                         | gi 290489566 | 80834.2  | 9.00  | 16 | 54    | 0      |       |        |
|   | 5                                                                                                                                                                                                                                                                                                                                                                                                                                                                                                                                                                                                                                                                                                                                                                                                                                                                                                                                           | Unnamed protein product [Ostreococcus tauri]                                                      | gi 308799307 | 33417.7  | 6.09  | 12 | 51    | 0      |       |        |
|   | 6                                                                                                                                                                                                                                                                                                                                                                                                                                                                                                                                                                                                                                                                                                                                                                                                                                                                                                                                           | E3 ubiquitin-protein ligase PUB23-like [Glycine max], predicted                                   | gi 356543678 | 45164    | 8.81  | 11 | 49.00 | 0      |       |        |
|   | 7                                                                                                                                                                                                                                                                                                                                                                                                                                                                                                                                                                                                                                                                                                                                                                                                                                                                                                                                           | Predicted protein [Chlamydomonas reinhardtii]                                                     | gi 159468908 | 22756.3  | 6.22  | 9  | 47.00 | 0      |       |        |
|   | 8                                                                                                                                                                                                                                                                                                                                                                                                                                                                                                                                                                                                                                                                                                                                                                                                                                                                                                                                           | Predicted protein [Ostreococcus lucimarinus CCE9901]                                              | gi 145341341 | 148305.1 | 5.65  | 24 | 47.00 | 0      |       |        |
|   | 9                                                                                                                                                                                                                                                                                                                                                                                                                                                                                                                                                                                                                                                                                                                                                                                                                                                                                                                                           | Predicted protein [Micromonas sp. RCC299]                                                         | gi 255089182 | 60494    | 7.75  | 12 | 46.00 | 0      |       |        |
|   | 10                                                                                                                                                                                                                                                                                                                                                                                                                                                                                                                                                                                                                                                                                                                                                                                                                                                                                                                                          | Unnamed protein product [Vitis vinifera]                                                          | gi 296090673 | 11253.8  | 11.94 | 7  | 46.00 | 0      |       |        |
|   | MVRHIQQTCGMNTVQTLTIYENNAACVAQVQTYGKSNLTHEINPKFFYAHLEQKMNELDATSEPDSWQELHNKAQSRPDSSPKAPSSFRIANPNRTLAPLPPPSGSKPPPTATMGFDVGVPFNPDGW<br>GPPETPAAPPSLGGATATASIPFAPFSRDKLGRIADWTRNPGGPGMHAAASRDSVDFDTSADDSLAAAAEDSSFHVLDAKPPRHRPRFGPKWRFNQRPQLPQRRDEEVEAKRREAERARRERHYQNHRSH<br>HHQGFGRGNQSSAKPSVDIQPDWTMREQIPFANFTKLSFTVNDQPEDLLVCGAVEFYDRAYDRVNPKAARLERFKSRNFFKVTTTDDPVIRRLAEEDKATVFATDAILAALMCTPRSILSWDIVVQRVGNKL<br>FFDKRDGSQLDLLTVNETAQEQLPENKDDINSAHALAVEATYINQNFSSQVVLVHEGEKVTFDEPNPFASEGEDAASNGYRYRRWKLDEEISIIARCEVHAASADASGGRQFFTLNALNEFDPKITGVDWQRK<br>LETQRGAVLATELKNNANKLARWTCQALLSGADMMKLGYSRVSRVHPRDHYNHSILTVMGYKPRDFAAQINLNTANMWGIVKYSIVDICMKFEEGKYVLVKDPAKQPVRIYSVPNDADFENDYVEEPLPEEEQV<br>RLDPTDDVDATAEFMDAAAEAFANKAATCGVYGEKNAEATVA                                                                                                                                                                                              |                                                                                                   |              |          |       |    |       |        |       |        |
|   | 1                                                                                                                                                                                                                                                                                                                                                                                                                                                                                                                                                                                                                                                                                                                                                                                                                                                                                                                                           | Predicted protein [Hordeum vulgare subsp. vulgare]                                                | gi 326533418 | 67502.8  | 5.52  | 21 | 296   | 100    | 161   | 100    |
| 7 | 2                                                                                                                                                                                                                                                                                                                                                                                                                                                                                                                                                                                                                                                                                                                                                                                                                                                                                                                                           | Eukaryotic translation initiation factor 3 subunit D-like [Brachypodium distachyon], predicted    | gi 357128487 | 78267.8  | 5.67  | 11 | 148   | 100    | 109   | 100    |

|    |                                                                                                                                                                                                                                                                                                                                                                                                                                                                                                                                                                                                                                                                                                                                                                                                                     |                                                                                                                         |               |          |       |    |       |        |     |        |
|----|---------------------------------------------------------------------------------------------------------------------------------------------------------------------------------------------------------------------------------------------------------------------------------------------------------------------------------------------------------------------------------------------------------------------------------------------------------------------------------------------------------------------------------------------------------------------------------------------------------------------------------------------------------------------------------------------------------------------------------------------------------------------------------------------------------------------|-------------------------------------------------------------------------------------------------------------------------|---------------|----------|-------|----|-------|--------|-----|--------|
|    | 3                                                                                                                                                                                                                                                                                                                                                                                                                                                                                                                                                                                                                                                                                                                                                                                                                   | Uncharacterized protein LOC100383775 [Zea mays]                                                                         | gi 293336540  | 36090.9  | 4.80  | 4  | 119   | 100    | 109 | 100    |
|    | 4                                                                                                                                                                                                                                                                                                                                                                                                                                                                                                                                                                                                                                                                                                                                                                                                                   | Hypothetical protein SELMODRAFT_425252 [Selaginella moellendorffii]                                                     | gi 302809182  | 30026.3  | 9.81  | 11 | 107   | 99.998 | 48  | 93.769 |
|    | 5                                                                                                                                                                                                                                                                                                                                                                                                                                                                                                                                                                                                                                                                                                                                                                                                                   | Unknown [Glycine max]                                                                                                   | gi 255634452  | 20542.2  | 4.54  | 3  | 73    | 95.277 | 62  | 99.72  |
|    | 6                                                                                                                                                                                                                                                                                                                                                                                                                                                                                                                                                                                                                                                                                                                                                                                                                   | Os05g0566500 [Oryza sativa Japonica Group]                                                                              | gi 297604927  | 65040.4  | 5.30  | 12 | 72    | 92.684 |     |        |
|    | 7                                                                                                                                                                                                                                                                                                                                                                                                                                                                                                                                                                                                                                                                                                                                                                                                                   | 30S ribosomal protein S1, chloroplastic;                                                                                | gi 133872     | 44759.1  | 5.41  | 8  | 71    | 92.339 |     |        |
|    | 8                                                                                                                                                                                                                                                                                                                                                                                                                                                                                                                                                                                                                                                                                                                                                                                                                   | Uncharacterized protein ycf45-like [Brachypodium distachyon], predicted                                                 | gi 357125252  | 71118.1  | 5.54  | 5  | 70    | 89.666 | 61  | 99.695 |
|    | 9                                                                                                                                                                                                                                                                                                                                                                                                                                                                                                                                                                                                                                                                                                                                                                                                                   | Spermidine synthase 2-like [Glycine max], predicted                                                                     | gi 356567616  | 36810.3  | 4.80  | 3  | 69    | 88.135 | 62  | 99.72  |
|    | 10                                                                                                                                                                                                                                                                                                                                                                                                                                                                                                                                                                                                                                                                                                                                                                                                                  | F-box protein SKIP23 [Medicago truncatula]                                                                              | gi 357492719  | 33514.1  | 8.44  | 3  | 68    | 85.403 | 60  | 99.562 |
|    | MASHIVGYPRMGPKRELKFALESFWDGKSSAEDLEKVATDLRASIWQKMAAGAGIKYIPSNTFAYYDQVLDTTAMLGAVPDRYSWTGGEINLSTYFSMARGNATVPAMEMTKWFDNTNYHFVPELGPDTKF<br>SYSSHKAINEYKEAKALGVDTVPVLVGPVSYLLLSKAAKGVEKSFPLSLLSSILPVYKEVIAELKAAASWQFDEPTLVKDLESHQLAAFAAAYTELESTLSGLNVLVETVFADVPAESYKTLTSLSSVTAYG<br>FDLERGTKTLELVKSGFPAGKYLFAGVVDGRNIWADDLAASLATLQSLEAIVGKDKLVVSTSCSLMHTAVDLVNETKLDDEIKSWLAFAAQKVVEVNALAKALAGQKDEAYFAANAAALASRRSSPRTNE<br>EVQKAATALKGSDHRRATTVSARLDAQQKKLNLPVLPPTTTIGSPQTVELRRVRREYKAKKISEEYTNAIKEISKVVKIQEELDIDVLVHGEPRNDMVEYFYGEQLSGFTTANGWVQSYGSRCVKPPIYG<br>DVSRRPNPMTVFWSKMAQSMTARPMKGMILTGPVITLNSWFSVRNDQPRFETCYQIALAIKKEVEDLEAGGIQVIQIDEAALREGLPLRKSEHAIFYLDWAVHSFRITNCGVQDTTQIHTHMCYSNFNDIIQSIINM<br>DADVDFIENSRSDKLI SVREGVYVYAGIGBQGVYDIHSPRIKSEFLIADRNVNKML AVLDTNIL WYNPDGCLG KTRKYAEVKBAUTNMVEAAKORAEI AKAO |                                                                                                                         |               |          |       |    |       |        |     |        |
| 8  | 1                                                                                                                                                                                                                                                                                                                                                                                                                                                                                                                                                                                                                                                                                                                                                                                                                   | Methionine synthase 1 enzyme [Hordeum vulgare subsp. vulgare]                                                           | gi 68655495   | 84511.3  | 5.74  | 27 | 1,100 | 100    | 928 | 100    |
|    | 2                                                                                                                                                                                                                                                                                                                                                                                                                                                                                                                                                                                                                                                                                                                                                                                                                   | Cobalamin-independent methionine synthase [Triticum monococcum]                                                         | gi 115589740  | 26146.4  | 6.10  | 11 | 622   | 100    | 546 | 100    |
|    | 3                                                                                                                                                                                                                                                                                                                                                                                                                                                                                                                                                                                                                                                                                                                                                                                                                   | 5-methyltetrahydropteroyltriglutamate-homocysteine methyltransferase-like [Brachypodium distachyon], predicted          | gi 357155679  | 84641.5  | 5.97  | 21 | 573   | 100    | 468 | 100    |
|    | 4                                                                                                                                                                                                                                                                                                                                                                                                                                                                                                                                                                                                                                                                                                                                                                                                                   | Osl2g0623900 [Oryza sativa Japonica Group]                                                                              | gi 15489652   | 84531.5  | 5.93  | 19 | 535   | 100    | 448 | 100    |
|    | 5                                                                                                                                                                                                                                                                                                                                                                                                                                                                                                                                                                                                                                                                                                                                                                                                                   | 5-methyltetrahydropteroyltriglutamate-homocysteine methyltransferase, putative, expressed [Oryza sativa Japonica Group] | gi 108862992  | 84582.4  | 5.93  | 18 | 529   | 100    | 451 | 100    |
|    | 6                                                                                                                                                                                                                                                                                                                                                                                                                                                                                                                                                                                                                                                                                                                                                                                                                   | Predicted protein [Hordeum vulgare subsp. vulgare]                                                                      | gi 326513870  | 84376.2  | 5.82  | 18 | 528   | 100    | 449 | 100    |
|    | 7                                                                                                                                                                                                                                                                                                                                                                                                                                                                                                                                                                                                                                                                                                                                                                                                                   | 5-methyltetrahydropteroyltriglutamate-homocysteine methyltransferase, putative, expressed [Oryza sativa Japonica Group] | gi 108862990  | 78929.9  | 7.19  | 17 | 522   | 100    | 448 | 100    |
|    | 8                                                                                                                                                                                                                                                                                                                                                                                                                                                                                                                                                                                                                                                                                                                                                                                                                   | Osl2g0624000 [Oryza sativa Japonica Group]                                                                              | gi 115489654  | 84612.4  | 5.93  | 17 | 521   | 100    | 451 | 100    |
|    | 9                                                                                                                                                                                                                                                                                                                                                                                                                                                                                                                                                                                                                                                                                                                                                                                                                   | 5-methyltetrahydropteroyltriglutamate--homocysteine methyltransferase-like [Brachypodium distachyon], predicted         | gi 357119807  | 84451.3  | 6.05  | 16 | 513   | 100    | 449 | 100    |
|    | 10                                                                                                                                                                                                                                                                                                                                                                                                                                                                                                                                                                                                                                                                                                                                                                                                                  | LOC100286153 [Zea mays]                                                                                                 | gi 2266531522 | 84417.3  | 5.85  | 16 | 441   | 100    | 379 | 100    |
|    | MACAWRSRADPLNWGKAAEELSGSHLEAVKRMVEEYRKPVVTMEGATTIAMVAAVAAGSDTRVELDESARGRVKESSDWVMNSMMNGTDSYGVTTGFATSHRRRTKEGVALQRELIRFLNAGAFGTGTDGHVLPAAA<br>TRAAMLRVNTLLQGYSGRFEILETIATLLNANVTPLCLRGTITASGDVLPSYIAGLVTPGNMATAPDGSKVNAAEFKIAQIHQFMFGQTEGLAMVNGTAVYSGLASMVLFEANVLSLLAEVLSGVFCEVMNGKPEF<br>TDHLTHKLKHHPGQIEAAAIMHEHLEGSSYMMLAKKLGELEDPLMKPKODRYALRTSPQWLGPQIEVIRAATKSIEREINSVNDNPLDIVSRGKAHHGGNFQGTPIGVSMNDTRLAIAAIGKLMFAQSELVNDFFYNGLPSNLSG<br>GRNPISLDYGFKGAEIAMASYCSEQLFNGPVTNHVQSAEQHNQDVNSLGLISSRKTAEDIAILKLMSSFTLVLCQAIDLRLHEENVKNVAVSKCVKTVARKLTSTDNNGLHLMNARFCEKDLLITDREAVFAYADDDPCSANYP<br>MQKMRAVLVYHALANGEAAHVETS VFYAKLAMFEQELRAVLPEKVEAARS AVENGTAQAQNRIAECRSYPLYRFVRKELGT EYLTGKTRSPGEVDKFVYAMNQGHIDALLECKEWNGEPLPLC                                                                                    |                                                                                                                         |               |          |       |    |       |        |     |        |
| 9  | 1                                                                                                                                                                                                                                                                                                                                                                                                                                                                                                                                                                                                                                                                                                                                                                                                                   | Phenylalanine ammonia-lyase                                                                                             | gi 3024363    | 75889.5  | 6.10  | 10 | 120   | 100    | 88  | 100    |
|    | 2                                                                                                                                                                                                                                                                                                                                                                                                                                                                                                                                                                                                                                                                                                                                                                                                                   | phenylalanine ammonia-lyase [Triticum aestivum]                                                                         | gi 371928984  | 55174.2  | 5.88  | 4  | 97    | 100    | 88  | 100    |
|    | 3                                                                                                                                                                                                                                                                                                                                                                                                                                                                                                                                                                                                                                                                                                                                                                                                                   | Inducible phenylalanine ammonia-lyase [Triticum                                                                         | gi 9965440    | 59360.4  | 5.88  | 4  | 96    | 100    | 88  | 100    |
|    | 4                                                                                                                                                                                                                                                                                                                                                                                                                                                                                                                                                                                                                                                                                                                                                                                                                   | Kinase R-like protein [Triticum aestivum]                                                                               | gi 17981551   | 18167.4  | 7.12  | 5  | 28    | 0      |     |        |
|    | 5                                                                                                                                                                                                                                                                                                                                                                                                                                                                                                                                                                                                                                                                                                                                                                                                                   | Eukaryotic translation initiation factor [Triticum aestivum],putative, expressed                                        | gi 300681560  | 117082.5 | 9.36  | 12 | 26    | 0      |     |        |
|    | 6                                                                                                                                                                                                                                                                                                                                                                                                                                                                                                                                                                                                                                                                                                                                                                                                                   | Glucan water dikinase [Triticum aestivum]                                                                               | gi 295687224  | 112709.9 | 4.91  | 11 | 24    | 0      |     |        |
|    | 7                                                                                                                                                                                                                                                                                                                                                                                                                                                                                                                                                                                                                                                                                                                                                                                                                   | Chloroplast acetyl-CoA carboxylase [Triticum aestivum]                                                                  | gi 55668382   | 8203.9   | 4.39  | 3  | 24    | 0      |     |        |
|    | 8                                                                                                                                                                                                                                                                                                                                                                                                                                                                                                                                                                                                                                                                                                                                                                                                                   | WRKY transcription factor [Triticum aestivum]                                                                           | gi 125491389  | 34615    | 10.09 | 6  | 23    | 0      |     |        |
|    | 9                                                                                                                                                                                                                                                                                                                                                                                                                                                                                                                                                                                                                                                                                                                                                                                                                   | Flavanone 3-hydroxylase [Triticum aestivum]                                                                             | gi 17361211   | 17494.9  | 8.83  | 4  | 23    | 0      |     |        |
|    | 10                                                                                                                                                                                                                                                                                                                                                                                                                                                                                                                                                                                                                                                                                                                                                                                                                  | Os07g0450000 [Oryza sativa Japonica Group]                                                                              | gi 115471897  | 12130.5  | 10.25 | 5  | 23    | 0      |     |        |
|    | MALSVEKTSRGREYKVKDLFDQADFRLLELALEVMPGLMACRTEFGSPQPFKGARISGSLHMTIQTAFLIETLTALGAEVRWCSCNIFSSQDHAAAIARDASA VFAWKGETLEEYWWCTERCULDWGVGGGPDIVIDDDGGD<br>ATLLIIEGVKAAEEFEKSGKVPDPSTDNPEFKIVLTIRDGLKLTDA SKYRKMKERLVGVSEETTGVKRLYQMQESGTLFPAINVNDSPKCFDNLYGCRHSLPDGLMRDVMIAKVAVVCYGDVGKGAALKQAG<br>ARVIVTEIDPICALQALMEGIQILTLEDVVSSEADIFVTTTGNDIIMVDHMRKMKNNAIVCNIGHFDNEIDMNGLETYPGVKRITIKPQTRDWRVFPETKTGIHVLAEGRMLMNLGCATGHPSFVMSCSFTNQVIAQLELWNEKASG<br>KYEKVVVYLPKHLDEKVAALHLGKLGARLTKLTKSQSDYISIPIEGPKYKRLRY                                                                                                                                                                                                                                                                                                           |                                                                                                                         |               |          |       |    |       |        |     |        |
| 10 | 1                                                                                                                                                                                                                                                                                                                                                                                                                                                                                                                                                                                                                                                                                                                                                                                                                   | Adenosylhomocysteinase [Triticum aestivum]                                                                              | SAHH WHEAT    | 53402.1  | 5.65  | 4  | 26    | 8.237  | 17  | 98.718 |
|    | 2                                                                                                                                                                                                                                                                                                                                                                                                                                                                                                                                                                                                                                                                                                                                                                                                                   | Ribulose biphosphate carboxylase small chain clone 512 (Fragment) [Triticum aestivum]                                   | RB53 WHEAT    | 13046.5  | 5.84  | 4  | 21    | 0      |     |        |
|    | 3                                                                                                                                                                                                                                                                                                                                                                                                                                                                                                                                                                                                                                                                                                                                                                                                                   | NAD(P)H-quinone oxidoreductase subunit 4L, chloroplastic [Triticum aestivum]                                            | NU4LC WHEAT   | 11296.1  | 9.09  | 3  | 20    | 0      |     |        |
|    | 4                                                                                                                                                                                                                                                                                                                                                                                                                                                                                                                                                                                                                                                                                                                                                                                                                   | Alpha-1-purothionin (Fragment) [Triticum aestivum]                                                                      | THN1 WHEAT    | 13516.2  | 4.76  | 2  | 19    | 0      | 10  | 93.47  |
|    | 5                                                                                                                                                                                                                                                                                                                                                                                                                                                                                                                                                                                                                                                                                                                                                                                                                   | Glutathione S-transferase OS=Triticum aestivum                                                                          | GSTZ WHEAT    | 23737.3  | 6.06  | 4  | 17    | 0      |     |        |
|    | 6                                                                                                                                                                                                                                                                                                                                                                                                                                                                                                                                                                                                                                                                                                                                                                                                                   | Phosphoglycerate kinase, cytosolic OS=Triticum                                                                          | PGKY WHEAT    | 42095.7  | 5.64  | 3  | 16    | 0      | 8   | 90.561 |
|    | 7                                                                                                                                                                                                                                                                                                                                                                                                                                                                                                                                                                                                                                                                                                                                                                                                                   | Gibberellin 3-beta-dioxygenase 2-3 [Triticum aestivum]                                                                  | G3O23 WHEAT   | 40300.4  | 6.43  | 5  | 15    | 0      |     |        |

|    |                                                                                                                                                                                                                                                                                                                                                                                                                                                                                                                                                                                                                                                                                                                                                                                                |                                                                                                      |              |          |      |    |     |        |     |        |
|----|------------------------------------------------------------------------------------------------------------------------------------------------------------------------------------------------------------------------------------------------------------------------------------------------------------------------------------------------------------------------------------------------------------------------------------------------------------------------------------------------------------------------------------------------------------------------------------------------------------------------------------------------------------------------------------------------------------------------------------------------------------------------------------------------|------------------------------------------------------------------------------------------------------|--------------|----------|------|----|-----|--------|-----|--------|
| 11 | 8                                                                                                                                                                                                                                                                                                                                                                                                                                                                                                                                                                                                                                                                                                                                                                                              | Alpha-2-purothionin [Triticum aestivum]                                                              | THN2 WHEAT   | 14547.8  | 5.13 | 4  | 15  | 0      |     |        |
|    | 9                                                                                                                                                                                                                                                                                                                                                                                                                                                                                                                                                                                                                                                                                                                                                                                              | DNA-directed RNA polymerase subunit beta [Triticum aestivum]                                         | RPOC2 WHEAT  | 169939   | 6.50 | 11 | 15  | 0      | 1   | 46.678 |
|    | 10                                                                                                                                                                                                                                                                                                                                                                                                                                                                                                                                                                                                                                                                                                                                                                                             | Small heat shock protein, chloroplastic [Triticum aestivum]                                          | HS21C WHEAT  | 26579.5  | 9.64 | 4  | 14  | 0      |     |        |
|    | MASHIVGYPRMGPKRELKFALESFWDGKSSAEDLEK VATDLRASIWKQMATTGKIYPSNTFSYYDQVLDTTAMLGAVPDRYSWTGGEINLSTYFSMARGNATVPAMEMTKWFDNTNYHFIVPELGPNTKFSYSSHKAINNEYKEAKALGIDTVPVLVGPVSYLLLSKPAKGVEKSFLLSLLSSILPVYKEVIAELKAAGASWIOFDEPTLVKDLDSHQLAAFFSSAYTELESALSGNLVLYETVYFADVPAESYKTLTSLSSVTAYGFDLERGTKTLDLVRSFGPAGKYLFAGVVDGRNIWADDLAASLITLQSLAEAVVGKDKLVVSTSCSLMHTAVDLVNETKLDDEIKSWLAFAAQKVVEVNALAKALAGQKDEAYFAANAAQSSRRSSPRVNAEVQKAATALKGSDHRRATNV SARLDAQQKKLNLPILPTTTIGSFQTVELRRVRREYKAKKISEEEYTNAIKEEISKVVKIQEELDIDVLVHGEPERNDMVEYFGEQLSGFAFTANGWVQSYGSRCKVPPIYGDVSRPNMTVFWSKTAQSM TARP MKGMLTGPVTILNWSFVRNDQPRFETCYQIALAIKKEVEDLEAGGIQVIQIDEAALREGLPLRKAHAFLYLDWAVHFSRITNCGVQDTTQIHTMCMYSNFNDIIQSIINMDADVITIENSRSDEKLLSVFREGVVYAGIGPGVYDIHSPRIPSMEEIADRVNKMLAVLDTNILWVNPDCGLKTRKYTEVKPALANMVEAAKLIRKQLASTK |                                                                                                      |              |          |      |    |     |        |     |        |
|    | 1                                                                                                                                                                                                                                                                                                                                                                                                                                                                                                                                                                                                                                                                                                                                                                                              | 5-methyltetrahydropteroyltriglutamate-homocysteine methyltransferase-like [Brachypodium distachyon]  | gi 357155679 | 84641.5  | 5.97 | 10 | 161 | 100    | 140 | 100    |
|    | 2                                                                                                                                                                                                                                                                                                                                                                                                                                                                                                                                                                                                                                                                                                                                                                                              | Methionine synthase 1 enzyme [Hordeum vulgare subsp. vulgare]                                        | gi 68655495  | 84511.3  | 5.74 | 10 | 161 | 100    | 140 | 100    |
|    | 3                                                                                                                                                                                                                                                                                                                                                                                                                                                                                                                                                                                                                                                                                                                                                                                              | Cobalamin-independent methionine synthase [Triticum monococcum]                                      | gi 115589740 | 26146.4  | 6.10 | 5  | 160 | 100    | 140 | 100    |
|    | 4                                                                                                                                                                                                                                                                                                                                                                                                                                                                                                                                                                                                                                                                                                                                                                                              | Methionine synthase [Medicago truncatula]                                                            | gi 357508777 | 88795    | 6.16 | 9  | 157 | 100    | 140 | 100    |
|    | 5                                                                                                                                                                                                                                                                                                                                                                                                                                                                                                                                                                                                                                                                                                                                                                                              | Methionine synthase [Medicago truncatula]                                                            | gi 357508781 | 83133.1  | 5.87 | 7  | 151 | 100    | 140 | 100    |
|    | 6                                                                                                                                                                                                                                                                                                                                                                                                                                                                                                                                                                                                                                                                                                                                                                                              | Alcohol dehydrogenase [Gossypium thurberi]                                                           | gi 6017997   | 23597.9  | 6.58 | 9  | 66  | 74.633 |     |        |
| 12 | 7                                                                                                                                                                                                                                                                                                                                                                                                                                                                                                                                                                                                                                                                                                                                                                                              | Hypothetical protein OsJ_17627 [Oryza sativa Japonica Group]                                         | gi 222630692 | 8358.2   | 5.00 | 6  | 51  | 0      |     |        |
|    | 8                                                                                                                                                                                                                                                                                                                                                                                                                                                                                                                                                                                                                                                                                                                                                                                              | Predicted protein [Micromonas sp. RCC299]                                                            | gi 255076057 | 172367   | 7.09 | 17 | 51  | 0      |     |        |
|    | 9                                                                                                                                                                                                                                                                                                                                                                                                                                                                                                                                                                                                                                                                                                                                                                                              | Putative protein [Arabidopsis thaliana]                                                              | gi 3297818   | 73366.5  | 6.22 | 14 | 51  | 0      |     |        |
|    | 10                                                                                                                                                                                                                                                                                                                                                                                                                                                                                                                                                                                                                                                                                                                                                                                             | Hypothetical protein CHLNCDRAFT_55969 [Chlorella variabilis]                                         | gi 307110782 | 52676.6  | 8.33 | 11 | 50  | 0      |     |        |
|    | MACAWRSRADPLN WGKA AEELSGSHLEAVKRMVEEYRKPVVTMEGATTIAMA VAAVAGSDTRVELDESARGVKESD WVMNSMMNGTDSYGVTTGFGATSHRRTKEGGALQRELIRFLNAGAFGTGTDGHVLPAAATRAAMLVRVNTLLQGYSGIRFEILETIATLLNANVTPCLPLRGTTTASGDLVPLSYIAGLVTRPNMSMATAPDGSKVNAEAEAFKIAGIQHGFELQPKEGLAMVNGTAVGSGGLASMVLFEANVLSLLAEVLSGVFCEVMNGKPEFTDHLTHKLKHHPGQIEAAAMEHILEGSSYMLAKKLGELDPLMKPKQDRYALRTSPQWLGPIEVIRAATKSIEREINSVNDNPLIDVSRGKA IHGGNFQGTPIGVSM DNTRLAIAAIGKLMFAQFSELVNDFYNNGLPSNLSGGRNPSLDYGFKGAEIAMASYCSELQFLGNPVTNHVQSAEQHNQDVNSLGLISSRKTAE AIDILKLMSSFTLVALCQAIDLRHLEENVKNAVSKCVTKVARKTLSTDNNGHLHNARFCEKDLLLTIDREAVFAYADDDPCSA NYPLMQKMRALVVEHALANGEAEAHVETSVFAKLAMFEQELRAVLPEKEVEAARS AVENGTA AQQNRIAECSRSPYLRFRVKELGTEYLTGKTRSPGVEVDKVFVAMNQKHIDALLECKEWNGEPLPLC                                                                |                                                                                                      |              |          |      |    |     |        |     |        |
|    | 1                                                                                                                                                                                                                                                                                                                                                                                                                                                                                                                                                                                                                                                                                                                                                                                              | Phenylalanine ammonia-lyase                                                                          | gi 3024363   | 75889.5  | 6.10 | 10 | 105 | 100    | 74  | 100    |
|    | 2                                                                                                                                                                                                                                                                                                                                                                                                                                                                                                                                                                                                                                                                                                                                                                                              | Phenylalanine ammonia-lyase [Triticum aestivum]                                                      | gi 371928984 | 55174.2  | 5.88 | 4  | 82  | 99.997 | 74  | 100    |
|    | 3                                                                                                                                                                                                                                                                                                                                                                                                                                                                                                                                                                                                                                                                                                                                                                                              | Inducible phenylalanine ammonia-lyase [Triticum                                                      | gi 9965440   | 59360.4  | 5.88 | 4  | 82  | 99.997 | 74  | 100    |
|    | 4                                                                                                                                                                                                                                                                                                                                                                                                                                                                                                                                                                                                                                                                                                                                                                                              | Cellulose synthase [Triticum aestivum], expressed                                                    | gi 299109313 | 111072.7 | 6.07 | 9  | 24  | 0      | 8   | 0      |
|    | 5                                                                                                                                                                                                                                                                                                                                                                                                                                                                                                                                                                                                                                                                                                                                                                                              | Ribulose-bisphosphate carboxylase (EC 4.1.1.39) small chain precursor (clone 234) - wheat (fragment) | gi 82619     | 15344.9  | 8.95 | 4  | 22  | 0      |     |        |
|    | 6                                                                                                                                                                                                                                                                                                                                                                                                                                                                                                                                                                                                                                                                                                                                                                                              | Ribulosebisphosphate carboxylase [Triticum aestivum]                                                 | gi 755804    | 18119.9  | 8.95 | 4  | 22  | 0      |     |        |
|    | 7                                                                                                                                                                                                                                                                                                                                                                                                                                                                                                                                                                                                                                                                                                                                                                                              | G protein alpha subunit [Triticum aestivum]                                                          | gi 22336036  | 45247.1  | 5.75 | 6  | 22  | 0      |     |        |
|    | 8                                                                                                                                                                                                                                                                                                                                                                                                                                                                                                                                                                                                                                                                                                                                                                                              | P450 [Triticum aestivum]                                                                             | gi 62148972  | 59565.9  | 6.77 | 7  | 21  | 0      |     |        |
|    | 9                                                                                                                                                                                                                                                                                                                                                                                                                                                                                                                                                                                                                                                                                                                                                                                              | ferritin [Triticum aestivum]                                                                         | gi 157674655 | 28167.2  | 5.67 | 5  | 21  | 0      |     |        |
|    | 10                                                                                                                                                                                                                                                                                                                                                                                                                                                                                                                                                                                                                                                                                                                                                                                             | alpha-1 purothionin [Triticum aestivum]                                                              | gi 1304262   | 14531.8  | 5.13 | 5  | 21  | 0      |     |        |
| 13 | HIYLSDLMRFM RQEEALKAMDLFEGAQE QNRVSKRSLKNWVVNAFRERKALALTNDTKTAVNKLHHMANVVVALIVFALWLLILGFATTKTFVFLSSQLLVA AFIFGNLKTIFEAIIFLV MHPFDVGDRC EVDGMQVVVEEMNIMTTIFLRYDNLK VYYPN SKLATLPI MN YRSPDMGDAVDFSVNVATPPEK LALMKERLMQYKEHWYPGSMVVL RDIDD TNRLKISIWCRHTINFQDMGMRFRDRRELILQEMMKILRDLDIEYRMLPLDINVNRNAPPINS TRMPTTWALNF                                                                                                                                                                                                                                                                                                                                                                                                                                                                           |                                                                                                      |              |          |      |    |     |        |     |        |
|    | 1                                                                                                                                                                                                                                                                                                                                                                                                                                                                                                                                                                                                                                                                                                                                                                                              | Mechanosensitive ion channel [Triticum aestivum]                                                     | gi 86439721  | 34712.9  | 8.46 | 8  | 30  | 0      |     |        |
|    | 2                                                                                                                                                                                                                                                                                                                                                                                                                                                                                                                                                                                                                                                                                                                                                                                              | PPR repeat domain containing protein [Triticum aestivum]                                             | gi 300681579 | 81867.8  | 6.21 | 11 | 27  | 0      |     |        |
|    | 3                                                                                                                                                                                                                                                                                                                                                                                                                                                                                                                                                                                                                                                                                                                                                                                              | PDI-like protein [Triticum aestivum], putative                                                       | gi 299469376 | 40249.9  | 6.17 | 7  | 27  | 0      |     |        |
|    | 4                                                                                                                                                                                                                                                                                                                                                                                                                                                                                                                                                                                                                                                                                                                                                                                              | Serine/threonine protein kinase [Triticum aestivum]                                                  | gi 14571547  | 45928.1  | 8.39 | 7  | 26  | 0      |     |        |
|    | 5                                                                                                                                                                                                                                                                                                                                                                                                                                                                                                                                                                                                                                                                                                                                                                                              | Annexin [Triticum aestivum]                                                                          | gi 38606205  | 35416.1  | 9.01 | 7  | 26  | 0      |     |        |
|    | 6                                                                                                                                                                                                                                                                                                                                                                                                                                                                                                                                                                                                                                                                                                                                                                                              | Glycosyltransferase [Triticum aestivum]                                                              | gi 56409844  | 65081    | 5.95 | 8  | 26  | 0      |     |        |
|    | 7                                                                                                                                                                                                                                                                                                                                                                                                                                                                                                                                                                                                                                                                                                                                                                                              | Cyclase/dehydrase, putative, expressed [Triticum aestivum]                                           | gi 300681463 | 25605.9  | 9.60 | 5  | 24  | 0      |     |        |
|    | 8                                                                                                                                                                                                                                                                                                                                                                                                                                                                                                                                                                                                                                                                                                                                                                                              | S-locus receptor kinase [Triticum aestivum], putative                                                | gi 62131096  | 59470.1  | 7.12 | 8  | 24  | 0      |     |        |
|    | 9                                                                                                                                                                                                                                                                                                                                                                                                                                                                                                                                                                                                                                                                                                                                                                                              | Oxygen-evolving enhancer protein 2, chloroplastic                                                    | gi 131394    | 27252.8  | 8.84 | 5  | 22  | 0      |     |        |
|    | 10                                                                                                                                                                                                                                                                                                                                                                                                                                                                                                                                                                                                                                                                                                                                                                                             | homeobox-like resistance [Triticum aestivum]                                                         | gi 166210345 | 37428.5  | 5.86 | 6  | 22  | 0      |     |        |

|    |                                                                                                                                                                                                                                                                                                                                                                                                                                                                                                                                       |                                                                                            |              |          |      |    |     |        |     |     |
|----|---------------------------------------------------------------------------------------------------------------------------------------------------------------------------------------------------------------------------------------------------------------------------------------------------------------------------------------------------------------------------------------------------------------------------------------------------------------------------------------------------------------------------------------|--------------------------------------------------------------------------------------------|--------------|----------|------|----|-----|--------|-----|-----|
| 14 | MSPQTETKAGVGFKAGVKDYKLTYYTPEYETKDTDLAAFRVSPQGPVPPEEAGAAVAEESSTGTWTTVWTDGLTSLDRYKGRCYHIEPVAGEDSQWICYVAYPLDLFEEGSVTNMFTSIVGNVFGFKALRALRLEDLRIPPTY<br>SKTFQGPPhGIQVERDKLNKYGRPLLGCITKPKLGLSAKNYGRACYECLRGGLDFTKDDENVNSQPFMRWRDRFVFCAEAIYKSQAETGEIKGHYLNATAGTCEEMIKRAVFARELGVPVIMHDYLTGGFTANTTLAHYCRD<br>NGLLLHIHRAMHAVIDRQKNHGMHFRVLAKALRMSGGDHIHSGTVVGKLEGEREMTLGFVDLLRDDFIEKDRARGIFFTQDWVSMGPVIVASGGIHVWHMPALTEIFGDDSVLQFGGGTLGHPWGNAPGAAANRVALEAC<br>VQARNEGRDLAREGNEIIRAACKWSPELAAACEVWKAIFEFEPVDTIDK                                |                                                                                            |              |          |      |    |     |        |     |     |
|    | 1                                                                                                                                                                                                                                                                                                                                                                                                                                                                                                                                     | Ribulose-1,5-bisphosphate carboxylase/oxygenase large subunit [Triticum aestivum]          | gi 14017580  | 52817.4  | 6.22 | 14 | 149 | 100    | 82  | 100 |
|    | 2                                                                                                                                                                                                                                                                                                                                                                                                                                                                                                                                     | Ribulose-1,5-bisphosphate carboxylase/oxygenase large subunit [Triticum aestivum]          | gi 32966580  | 52757.3  | 6.22 | 14 | 148 | 100    | 82  | 100 |
|    | 3                                                                                                                                                                                                                                                                                                                                                                                                                                                                                                                                     | Ribulose-1,5-bisphosphate carboxylase/oxygenase large subunit [Triticum aestivum]          | gi 339742637 | 21900    | 7.57 | 7  | 129 | 100    | 82  | 100 |
|    | 4                                                                                                                                                                                                                                                                                                                                                                                                                                                                                                                                     | Ribulose-1,5-bisphosphate carboxylase/oxygenase large subunit, partial [Triticum aestivum] | gi 313664567 | 22368.2  | 5.78 | 6  | 119 | 100    | 82  | 100 |
|    | 5                                                                                                                                                                                                                                                                                                                                                                                                                                                                                                                                     | Ribulose 1,5-bisphosphate carboxylase/oxygenase large subunit [Triticum aestivum]          | gi 12344     | 46972.5  | 6.60 | 10 | 38  | 25.245 |     |     |
|    | 6                                                                                                                                                                                                                                                                                                                                                                                                                                                                                                                                     | Starch synthase IIb precursor [Triticum aestivum]                                          | gi 189096677 | 143134.1 | 5.13 | 13 | 27  | 0      |     |     |
|    | 7                                                                                                                                                                                                                                                                                                                                                                                                                                                                                                                                     | Multiple inositol polyphosphate phosphatase Phyllc [Triticum aestivum]                     | gi 116294385 | 58093.8  | 7.55 | 8  | 25  | 0      |     |     |
|    | 8                                                                                                                                                                                                                                                                                                                                                                                                                                                                                                                                     | Multiple inositol polyphosphate phosphatase Phyllb [Triticum aestivum]                     | gi 116294383 | 58056.7  | 7.55 | 8  | 24  | 0      |     |     |
|    | 9                                                                                                                                                                                                                                                                                                                                                                                                                                                                                                                                     | ADP-glucose pyrophosphorylase small subunit, plastid [Triticum aestivum]                   | gi 224021585 | 56253.8  | 6.40 | 7  | 23  | 0      |     |     |
|    | 10                                                                                                                                                                                                                                                                                                                                                                                                                                                                                                                                    | WRKY39 transcription factor [Triticum aestivum]                                            | gi 189172061 | 26186.2  | 8.98 | 5  | 23  | 0      |     |     |
| 15 | MSPQTETKAGVGFKAGVKDYKLTYYTPEYETKDTDLAAFRVSPQGPVPPEEAGAAVAEESSTGTWTTVWTDGLTSLDRYKGRCYHIEPVAGEDSQWICYVAYPLDLFEEGSVTNMFTSIVGNVFGFKALRALRLEDLRIPPTY<br>SKTFQGPPhGIQVERDKLNKYGRPLLGCITKPKLGLSAKNYGRACYECLRGGLDFTKDDENVNSQPFMRWRDRFVFCAEAIYKSQAETGEIKGHYLNATAGTCEEMIKRAVFARELGVPVIMHDYLTGGFTANTTLAHYCRD<br>NGLLLHIHRAMHAVIDRQKNHGMHFRVLAKALRMSGGDHIHSGTVVGKLEGEREMTLGFVDLLRDDFIEKDRARGIFFTQDWVSMGPVIVASGGIHVWHMPALTEIFGDDSVLQFGGGTLGHPWGNAPGAAANRVALEAC<br>VQARNEGRDLAREGNEIIRAACKWSPELAAACEVWKAIFEFEPVDTIDK                                |                                                                                            |              |          |      |    |     |        |     |     |
|    | 1                                                                                                                                                                                                                                                                                                                                                                                                                                                                                                                                     | Ribulose-1,5-bisphosphate carboxylase/oxygenase large subunit [Triticum aestivum]          | gi 14017580  | 52817.4  | 6.22 | 25 | 806 | 100    | 611 | 100 |
|    | 2                                                                                                                                                                                                                                                                                                                                                                                                                                                                                                                                     | Ribulose-1,5-bisphosphate carboxylase/oxygenase large subunit [Triticum aestivum]          | gi 32966580  | 52757.3  | 6.22 | 24 | 793 | 100    | 611 | 100 |
|    | 3                                                                                                                                                                                                                                                                                                                                                                                                                                                                                                                                     | Ribulose-1,5-bisphosphate carboxylase/oxygenase large subunit [Triticum aestivum]          | gi 12344     | 46972.5  | 6.60 | 20 | 574 | 100    | 434 | 100 |
|    | 4                                                                                                                                                                                                                                                                                                                                                                                                                                                                                                                                     | Ribulose-1,5-bisphosphate carboxylase/oxygenase large subunit [Triticum aestivum]          | gi 339742637 | 21900    | 7.57 | 11 | 411 | 100    | 321 | 100 |
|    | 5                                                                                                                                                                                                                                                                                                                                                                                                                                                                                                                                     | Ribulose-1,5-bisphosphate carboxylase/oxygenase large subunit, partial [Triticum aestivum] | gi 313664567 | 22368.2  | 5.78 | 10 | 399 | 100    | 321 | 100 |
|    | 6                                                                                                                                                                                                                                                                                                                                                                                                                                                                                                                                     | Ribulose-1,5-bisphosphate carboxylase/oxygenase large subunit (30 AA) [Triticum aestivum]  | gi 12366     | 3423.7   | 4.66 | 2  | 130 | 100    | 113 | 100 |
|    | 7                                                                                                                                                                                                                                                                                                                                                                                                                                                                                                                                     | P450 [Triticum aestivum]                                                                   | gi 48762803  | 59137.5  | 6.41 | 11 | 45  | 85.424 |     |     |
|    | 8                                                                                                                                                                                                                                                                                                                                                                                                                                                                                                                                     | P450 [Triticum aestivum]                                                                   | gi 62148972  | 59565.9  | 6.77 | 9  | 32  | 0      |     |     |
|    | 9                                                                                                                                                                                                                                                                                                                                                                                                                                                                                                                                     | P450 [Triticum aestivum]                                                                   | gi 48526681  | 59208.6  | 6.61 | 9  | 32  | 0      |     |     |
|    | 10                                                                                                                                                                                                                                                                                                                                                                                                                                                                                                                                    | P450 [Triticum aestivum]                                                                   | gi 48526683  | 59201.6  | 6.30 | 9  | 32  | 0      |     |     |
| 16 | MAICKVWISLLALAVVLSAPAAAREEAAAAEEAAPEAVLTLHADNFDDAIKHPFILVEFYAPWCGHCKSLAPEYEKAAQLLSKHDPAILAKVDANDEKNKPLAGKYEYVQGPPTLKIFRNGGKNIQYKGPRAEAGIVE<br>YLKKQVGPASKEIKAPEDATYLEDGKIHVGVTEFGSGTEFTNFELEAEKLRSDYDFGHTVHANHLPRGDAAYERPLVRLFKPFDELVDSDKDFDVSALKFIDASTPKVVTFDKNPDNHPYLLKFFQTNAPKAMFLNFSTGP<br>FESFKSAYYGAVEEFGSKDVKFLIGDIEASQGAQFYFGLKEDQAPLILIQSDSKKFLKEQVEAGQIVAWLKDYFDGKLTFRKSEPIPEANNEPVKVVVADNVHDVVFKSGKNVLIIEFYAPWCGHCKKLAPILDEAAATLQSEE<br>DVVIAKMDATANDVPSEFDVQGYPTLYFVTPSGKKVSYEGGRTADEIVDYIKKNKETAGQAAAADTEKAAEPAATEPLKDEL |                                                                                            |              |          |      |    |     |        |     |     |
|    | 1                                                                                                                                                                                                                                                                                                                                                                                                                                                                                                                                     | Protein disulfide isomerase [Triticum aestivum]                                            | gi 222446340 | 56635.9  | 4.96 | 30 | 803 | 100    | 532 | 100 |
|    | 2                                                                                                                                                                                                                                                                                                                                                                                                                                                                                                                                     | Protein disulfide-isomerase                                                                | gi 1709620   | 56497.9  | 4.99 | 29 | 787 | 100    | 532 | 100 |
|    | 3                                                                                                                                                                                                                                                                                                                                                                                                                                                                                                                                     | Protein disulfide isomerase 1 proprotein [Triticum aestivum]                               | gi 13925723  | 56544    | 4.99 | 28 | 773 | 100    | 532 | 100 |
|    | 4                                                                                                                                                                                                                                                                                                                                                                                                                                                                                                                                     | Protein disulfide isomerase [Triticum aestivum]                                            | gi 222446344 | 56635.9  | 4.93 | 30 | 723 | 100    | 454 | 100 |
|    | 5                                                                                                                                                                                                                                                                                                                                                                                                                                                                                                                                     | Protein disulfide isomerase [Triticum aestivum]                                            | gi 222446342 | 56377.8  | 5.03 | 29 | 709 | 100    | 454 | 100 |
|    | 6                                                                                                                                                                                                                                                                                                                                                                                                                                                                                                                                     | Protein disulfide isomerase [Triticum aestivum]                                            | gi 335906219 | 56333.8  | 5.06 | 28 | 695 | 100    | 454 | 100 |
|    | 7                                                                                                                                                                                                                                                                                                                                                                                                                                                                                                                                     | Protein disulfide isomerase [Triticum aestivum]                                            | gi 335906215 | 56611.9  | 4.93 | 25 | 655 | 100    | 454 | 100 |
|    | 8                                                                                                                                                                                                                                                                                                                                                                                                                                                                                                                                     | Protein disulfide isomerase [Triticum aestivum]                                            | gi 335906217 | 56364.7  | 4.96 | 24 | 643 | 100    | 454 | 100 |
|    | 9                                                                                                                                                                                                                                                                                                                                                                                                                                                                                                                                     | Protein disulfide isomerase precursor [Triticum aestivum]                                  | gi 67508765  | 56559.9  | 4.99 | 26 | 550 | 100    | 340 | 100 |
|    | 10                                                                                                                                                                                                                                                                                                                                                                                                                                                                                                                                    | Protein disulfide isomerase [Triticum aestivum]                                            | gi 47118054  | 16692.4  | 5.16 | 9  | 540 | 100    | 464 | 100 |
|    | MAMVDEPLYPIAVLIDELKNEDIQLRLNSIRRLSTIARALGEERTRKELIPFLSENNDDEDEVLLAMAEELGVFIPYVGGVEHAHVLLPLELTSTVEETCVRDKAVESLCRIGAQMKEKENDIVDYFIADVVKRLAAGWEFTARVSSC<br>GLFHIAYPSATDPLKTELRTYQGLQDDMPMVRRAAASNLGKFAATVEQSHLKTETMSIFDDLTQDDQDSVRLLAVERGCAALGKLEPDQCVAHILPVIVNFSQDKSWRVRYMVANQYELCEAVGPEPTRADLVPAVYVRLLR<br>DNEAEVRIAAAGKVTKFCRILSPQLAIQHILPCVKELSSDSSQHVRSAASVIMGMAPVLGKDATIEQLLPIFLSLLKDEFPDVRNLNIIKSLDQVNVQVIGIDLLSQSLLPAIVELAEDRHWVRRLAIIIEYIPLLASQLGVGFDDKLG<br>ALCMQWLEDKVSFIREAAANLKRLAEEFGPEWAMQHIIQPVLEKINNPHYL                |                                                                                            |              |          |      |    |     |        |     |     |
|    | YRMTILQAISLLAPVMGAIEITCQKLLPVVINSSKDRVPNIKFNVAKVLQSLVPLILDQSVAEKTVKPCLVELSEDPDQDVRYANQALQACDQIMMSS                                                                                                                                                                                                                                                                                                                                                                                                                                    |                                                                                            |              |          |      |    |     |        |     |     |
|    | 1                                                                                                                                                                                                                                                                                                                                                                                                                                                                                                                                     | Protein phosphatase 2A structural subunit [Triticum aestivum]                              | gi 328775741 | 65460.1  | 4.95 | 18 | 514 | 100    | 403 | 100 |
|    | 2                                                                                                                                                                                                                                                                                                                                                                                                                                                                                                                                     | Protein disulfide isomerase [Triticum aestivum]                                            | gi 222446342 | 56377.8  | 5.03 | 20 | 233 | 100    | 100 | 100 |



|                                                                                                                                                                                                                                                                                                                                                                                                                                                                                                                                                                                                                                                                                                                                                                                                                      |                                                                                                                                                                                                                                                                                                                                                                                                                                                                                                                        |                                                                                                                  |                                                                           |            |         |      |     |        |        |        |  |
|----------------------------------------------------------------------------------------------------------------------------------------------------------------------------------------------------------------------------------------------------------------------------------------------------------------------------------------------------------------------------------------------------------------------------------------------------------------------------------------------------------------------------------------------------------------------------------------------------------------------------------------------------------------------------------------------------------------------------------------------------------------------------------------------------------------------|------------------------------------------------------------------------------------------------------------------------------------------------------------------------------------------------------------------------------------------------------------------------------------------------------------------------------------------------------------------------------------------------------------------------------------------------------------------------------------------------------------------------|------------------------------------------------------------------------------------------------------------------|---------------------------------------------------------------------------|------------|---------|------|-----|--------|--------|--------|--|
| 17                                                                                                                                                                                                                                                                                                                                                                                                                                                                                                                                                                                                                                                                                                                                                                                                                   | 3                                                                                                                                                                                                                                                                                                                                                                                                                                                                                                                      | Protein disulfide isomerase [Triticum aestivum]                                                                  | gi 335906219                                                              | 56333.8    | 5.06    | 19   | 222 | 100    | 100    | 100    |  |
|                                                                                                                                                                                                                                                                                                                                                                                                                                                                                                                                                                                                                                                                                                                                                                                                                      | 4                                                                                                                                                                                                                                                                                                                                                                                                                                                                                                                      | Protein disulfide isomerase [Triticum aestivum]                                                                  | gi 222446344                                                              | 56635.9    | 4.93    | 19   | 222 | 100    | 100    | 100    |  |
|                                                                                                                                                                                                                                                                                                                                                                                                                                                                                                                                                                                                                                                                                                                                                                                                                      | 5                                                                                                                                                                                                                                                                                                                                                                                                                                                                                                                      | Protein disulfide isomerase [Triticum aestivum]                                                                  | gi 335906217                                                              | 56364.7    | 4.96    | 18   | 212 | 100    | 100    | 100    |  |
|                                                                                                                                                                                                                                                                                                                                                                                                                                                                                                                                                                                                                                                                                                                                                                                                                      | 6                                                                                                                                                                                                                                                                                                                                                                                                                                                                                                                      | Protein disulfide isomerase [Triticum aestivum]                                                                  | gi 222446340                                                              | 56635.9    | 4.96    | 16   | 192 | 100    | 100    | 100    |  |
|                                                                                                                                                                                                                                                                                                                                                                                                                                                                                                                                                                                                                                                                                                                                                                                                                      | 7                                                                                                                                                                                                                                                                                                                                                                                                                                                                                                                      | Protein disulfide-isomerase, precursor                                                                           | gi 1709620                                                                | 56497.9    | 4.99    | 16   | 191 | 100    | 100    | 100    |  |
|                                                                                                                                                                                                                                                                                                                                                                                                                                                                                                                                                                                                                                                                                                                                                                                                                      | 8                                                                                                                                                                                                                                                                                                                                                                                                                                                                                                                      | Protein disulfide isomerase [Triticum aestivum]                                                                  | gi 335906215                                                              | 56611.9    | 4.93    | 15   | 182 | 100    | 100    | 100    |  |
|                                                                                                                                                                                                                                                                                                                                                                                                                                                                                                                                                                                                                                                                                                                                                                                                                      | 9                                                                                                                                                                                                                                                                                                                                                                                                                                                                                                                      | Protein disulfide isomerase 1 proprotein [Triticum                                                               | gi 13925723                                                               | 56544      | 4.99    | 15   | 182 | 100    | 100    | 100    |  |
|                                                                                                                                                                                                                                                                                                                                                                                                                                                                                                                                                                                                                                                                                                                                                                                                                      | 10                                                                                                                                                                                                                                                                                                                                                                                                                                                                                                                     | Protein disulfide isomerase [Triticum aestivum]                                                                  | gi 48093451                                                               | 10215.2    | 5.43    | 7    | 166 | 100    | 100    | 100    |  |
|                                                                                                                                                                                                                                                                                                                                                                                                                                                                                                                                                                                                                                                                                                                                                                                                                      | RASPPSESAPLRAPQRSATRQHQAARQGPRRMCMGGRGPYWTAGVTSAPARQTPLFSGRPSGGLSDPNEVAAVILGGGTGTQLFPLTSTRATPAVPIGGCYRLIDIPMSNCFNSGINKFVMTQFNSASLNRHIIHRTYLGGGINFTDGSVEVLAATQMPGEAAGWFRGTADAWRKIIWVLEDYYKNKSIEHILSLGDQLYRMDYMELVQKHVDDNADITLSCAPVGESRASEYGLVKFDSSGRVVFQSEQPKGDDLEAMKVDTSFLNFAIDDDPAKYPIYASMGVYVFKRDVLLNLLKSRYAELHDFGSEILPRALHDHNVQAYVFVTDY WEDIGTIRSFDDANRALCEQPPKFEFYDPKTPFFTSPRYLPPTKSDKCRKEAIIHLHGCFRECKIEHTAFSRLNSGSELKNAMMMGADSYETEDEM SRLMSEGKVPIGVGENTKISNCIIDMNAIRIGRDVVISNKEGVQEADRPEEGYYIRSGIVVIQKNATIKDGTVV |                                                                                                                  |                                                                           |            |         |      |     |        |        |        |  |
|                                                                                                                                                                                                                                                                                                                                                                                                                                                                                                                                                                                                                                                                                                                                                                                                                      | 18                                                                                                                                                                                                                                                                                                                                                                                                                                                                                                                     | 1                                                                                                                | Adenylosuccinate synthetase, chloroplastic (Fragment) [Triticum aestivum] | PURA WHEAT | 50886.1 | 5.93 | 8   | 26     | 12.367 |        |  |
| 2                                                                                                                                                                                                                                                                                                                                                                                                                                                                                                                                                                                                                                                                                                                                                                                                                    |                                                                                                                                                                                                                                                                                                                                                                                                                                                                                                                        | Glucose-1-phosphate adenylyltransferase large subunit, chloroplastic/amyloplastic (Fragment) [Triticum aestivum] | GLGL3 WHEAT                                                               | 55524.7    | 6.61    | 6    | 26  | 8.237  | 12     | 96.153 |  |
| 3                                                                                                                                                                                                                                                                                                                                                                                                                                                                                                                                                                                                                                                                                                                                                                                                                    |                                                                                                                                                                                                                                                                                                                                                                                                                                                                                                                        | Ribulose biphosphate carboxylase small chain clone 512 (Fragment) [Triticum aestivum]                            | RBS3 WHEAT                                                                | 13046.5    | 5.84    | 4    | 22  | 0      |        |        |  |
| 4                                                                                                                                                                                                                                                                                                                                                                                                                                                                                                                                                                                                                                                                                                                                                                                                                    |                                                                                                                                                                                                                                                                                                                                                                                                                                                                                                                        | Alpha-2-purothionin OS=Triticum aestivum GN=THI1.2                                                               | THN2 WHEAT                                                                | 14547.8    | 5.13    | 5    | 19  | 0      |        |        |  |
| 5                                                                                                                                                                                                                                                                                                                                                                                                                                                                                                                                                                                                                                                                                                                                                                                                                    |                                                                                                                                                                                                                                                                                                                                                                                                                                                                                                                        | Phosphoribulokinase, chloroplastic [Triticum aestivum]                                                           | KPPR WHEAT                                                                | 45112.9    | 5.72    | 6    | 18  | 0      |        |        |  |
| 6                                                                                                                                                                                                                                                                                                                                                                                                                                                                                                                                                                                                                                                                                                                                                                                                                    |                                                                                                                                                                                                                                                                                                                                                                                                                                                                                                                        | Flavone O-methyltransferase 1 OS=Triticum aestivum                                                               | FOMT1 WHEAT                                                               | 38834.6    | 5.75    | 5    | 16  | 0      |        |        |  |
| 7                                                                                                                                                                                                                                                                                                                                                                                                                                                                                                                                                                                                                                                                                                                                                                                                                    |                                                                                                                                                                                                                                                                                                                                                                                                                                                                                                                        | 30S ribosomal protein S11, chloroplastic [Triticum aestivum]                                                     | RR11 WHEAT                                                                | 15556.6    | 12.01   | 4    | 16  | 0      |        |        |  |
| 8                                                                                                                                                                                                                                                                                                                                                                                                                                                                                                                                                                                                                                                                                                                                                                                                                    |                                                                                                                                                                                                                                                                                                                                                                                                                                                                                                                        | Gibberellin 20 oxidase 1-A OS=Triticum aestivum                                                                  | GAO1A WHEAT                                                               | 40679.3    | 6.27    | 4    | 15  | 0      | 4      | 78.614 |  |
| 9                                                                                                                                                                                                                                                                                                                                                                                                                                                                                                                                                                                                                                                                                                                                                                                                                    |                                                                                                                                                                                                                                                                                                                                                                                                                                                                                                                        | Dihydrodipicolinate synthase 2, chloroplastic [Triticum aestivum]                                                | DAPA2 WHEAT                                                               | 40849.9    | 6.80    | 5    | 15  | 0      |        |        |  |
| 10                                                                                                                                                                                                                                                                                                                                                                                                                                                                                                                                                                                                                                                                                                                                                                                                                   |                                                                                                                                                                                                                                                                                                                                                                                                                                                                                                                        | Protochlorophyllide reductase A, chloroplastic [Triticum aestivum]                                               | PORA WHEAT                                                                | 141130.1   | 9.42    | 5    | 15  | 0      |        |        |  |
| MSSAVASAASFLALASAPGRSRRRTVSASPPHTGAGRLHWPPSPPORTARDGAVAARAAGKKDAGIDDAAPARQPRALRGGAATKVAERRDPVKTLDRDAAEGGAPSPAPRQEDARLPSPMNGMPVNGENKSTGGGGATKDSGLPAPARAPQSSQNRVPVNGENKANVASPPTSIAEVAAPDPAATISISDKAPESVVPAAEKAPSSGSNFVPSASAPGSDTVSDVELELKKGAVIVKEAPNPKALSPPAAPAVQQDLWDFKKYIGFEEEPVEAKDDGRAVADDAGSFEHHQNHDSGPLAGENVMNVVVVAECSPWCKTGGLGDVAGALPKALAKGRHRVMVVVPYRGDYEEAYDVGVKRYKKAAGQDMENVYFHAYIDGVDFVFIDAPLFRHRQEDIYGGSRQEIMKRMILFCKAAVEVPWHVPCGGVPYGDGNLVFIANDWHTALLPVYLKAYYRDHGLMQYTRSIMVIHNAHQGRGVPDEFPTLPEHYLEHFRLYDPVGEHANVFAAGLKMAQDVVVVSPGYLWELKTVEGGWGLHDIIRQNDWKTRGVNGIDNMEWNPEVDVHLKSDGYTNFSLGTLDSGKKRCKEALQRELGLQVRGDVPLLGFIGRLDGQKGVEIADAMPWIVSQDVQLVMLGTGRHDLEGLMRHFEREHDKVRGWVGSVRLAHRITAGADALLMPSRFEPICGLNQLYAMAYGTVPVVHAVGGLRDTVPFPDFNFHSLGLWTFDRAEAQKLIEALGHCLRTYRDYKESWRGLQERGMSQDFSWEHAAKLYEDVLVKAKYQW |                                                                                                                                                                                                                                                                                                                                                                                                                                                                                                                        |                                                                                                                  |                                                                           |            |         |      |     |        |        |        |  |
| 19                                                                                                                                                                                                                                                                                                                                                                                                                                                                                                                                                                                                                                                                                                                                                                                                                   | 1                                                                                                                                                                                                                                                                                                                                                                                                                                                                                                                      | Starch synthase IIa-3 [Triticum aestivum]                                                                        | gi 8953573                                                                | 86740.6    | 6.27    | 7    | 37  | 0      | 25     | 93.636 |  |
|                                                                                                                                                                                                                                                                                                                                                                                                                                                                                                                                                                                                                                                                                                                                                                                                                      | 2                                                                                                                                                                                                                                                                                                                                                                                                                                                                                                                      | Starch synthase IIa-1 [Triticum aestivum]                                                                        | gi 7529653                                                                | 86891.4    | 6.05    | 6    | 36  | 0      | 25     | 93.636 |  |
|                                                                                                                                                                                                                                                                                                                                                                                                                                                                                                                                                                                                                                                                                                                                                                                                                      | 3                                                                                                                                                                                                                                                                                                                                                                                                                                                                                                                      | Starch synthase IIA [Triticum aestivum]                                                                          | gi 5825480                                                                | 87179.8    | 6.20    | 6    | 35  | 0      | 25     | 93.636 |  |
|                                                                                                                                                                                                                                                                                                                                                                                                                                                                                                                                                                                                                                                                                                                                                                                                                      | 4                                                                                                                                                                                                                                                                                                                                                                                                                                                                                                                      | MYB-related protein [Triticum aestivum]                                                                          | gi 359950756                                                              | 60684.5    | 9.43    | 11   | 34  | 0      |        |        |  |
|                                                                                                                                                                                                                                                                                                                                                                                                                                                                                                                                                                                                                                                                                                                                                                                                                      | 5                                                                                                                                                                                                                                                                                                                                                                                                                                                                                                                      | Starch synthase [Triticum aestivum]                                                                              | gi 1620660                                                                | 55636.9    | 6.15    | 4    | 34  | 0      | 25     | 93.636 |  |
|                                                                                                                                                                                                                                                                                                                                                                                                                                                                                                                                                                                                                                                                                                                                                                                                                      | 6                                                                                                                                                                                                                                                                                                                                                                                                                                                                                                                      | Thioredoxin H [Triticum aestivum]                                                                                | gi 27461140                                                               | 12685.4    | 5.29    | 5    | 28  | 0      |        |        |  |
|                                                                                                                                                                                                                                                                                                                                                                                                                                                                                                                                                                                                                                                                                                                                                                                                                      | 7                                                                                                                                                                                                                                                                                                                                                                                                                                                                                                                      | MYB-related protein [Triticum aestivum]                                                                          | gi 359952782                                                              | 48051.4    | 8.93    | 6    | 28  | 0      | 11     | 0      |  |
|                                                                                                                                                                                                                                                                                                                                                                                                                                                                                                                                                                                                                                                                                                                                                                                                                      | 8                                                                                                                                                                                                                                                                                                                                                                                                                                                                                                                      | Dehydroascorbate reductase [Triticum aestivum]                                                                   | gi 259017810                                                              | 23343.1    | 5.88    | 5    | 27  | 0      | 4      | 0      |  |
|                                                                                                                                                                                                                                                                                                                                                                                                                                                                                                                                                                                                                                                                                                                                                                                                                      | 9                                                                                                                                                                                                                                                                                                                                                                                                                                                                                                                      | CHY-type zinc finger protein [Triticum aestivum]                                                                 | gi 282767742                                                              | 32057.4    | 6.70    | 8    | 24  | 0      |        |        |  |
|                                                                                                                                                                                                                                                                                                                                                                                                                                                                                                                                                                                                                                                                                                                                                                                                                      | 10                                                                                                                                                                                                                                                                                                                                                                                                                                                                                                                     | Starch branching enzyme II [Triticum aestivum]                                                                   | gi 145666648                                                              | 15223.9    | 4.85    | 2    | 24  | 0      | 16     | 48.861 |  |
| MDTITVVENVFGEVERKVQKSYWEHSKDLTVESMMLDSRAKDLDKEERPEVLAIPSYAGKTVLELGAIGRFTGELAKEAGHVIALDFIDSVIKKNEEINGDIYKNITMCADVTSPELKIEDNSVDIVFSNWLMLYNDEEVEKLIGRIVKWLKPGGHIFIRESCFHQSGDSKRKVNPHYREPRFYTKVFKECHSYDQEGNSFELSLVTSKCIGAYVKSCKNQNICWLWEKVKCTEDKGQFORLDNVQYKSTGILRYERVFGEGYVSTGGFETTKFEVDKLDLKAGQKVLVDVCGIGGGDFYMAETVDVHVLGIDLINMVSFAIERAIGRSCSVEFEVADCTTKEYAENTFDVIYSRDTILHIQDKPALFRNFFKWLKPGGKVLISDYCRSPGTPSEFAAYIKQRGYDLHDVKTYGKMLEADAGFHDVVAEDRTDQFLRVLERELGETEKNEAFLADFTQEDYDDIVNGWSAKLKRSSAGEQKWGLFIATK                                                                                                                                                                                                                                                                                                            |                                                                                                                                                                                                                                                                                                                                                                                                                                                                                                                        |                                                                                                                  |                                                                           |            |         |      |     |        |        |        |  |
| 20                                                                                                                                                                                                                                                                                                                                                                                                                                                                                                                                                                                                                                                                                                                                                                                                                   | 1                                                                                                                                                                                                                                                                                                                                                                                                                                                                                                                      | Beta-amylase/1,4-alpha-D-glucan maltohydrolase                                                                   | gi 3334120                                                                | 56575.1    | 5.24    | 18   | 696 | 100    | 575    | 100    |  |
|                                                                                                                                                                                                                                                                                                                                                                                                                                                                                                                                                                                                                                                                                                                                                                                                                      | 2                                                                                                                                                                                                                                                                                                                                                                                                                                                                                                                      | phosphoethanolamine methyltransferase [Triticum aestivum]                                                        | gi 17887465                                                               | 56822.4    | 5.21    | 12   | 128 | 100    | 72     | 100    |  |
|                                                                                                                                                                                                                                                                                                                                                                                                                                                                                                                                                                                                                                                                                                                                                                                                                      | 3                                                                                                                                                                                                                                                                                                                                                                                                                                                                                                                      | Vacuolar ATPase subunit B1 [Triticum aestivum]                                                                   | gi 125744990                                                              | 53958.6    | 5.12    | 10   | 42  | 67.368 |        |        |  |
|                                                                                                                                                                                                                                                                                                                                                                                                                                                                                                                                                                                                                                                                                                                                                                                                                      | 4                                                                                                                                                                                                                                                                                                                                                                                                                                                                                                                      | Peroxioredoxin [Triticum aestivum]                                                                               | gi 190684059                                                              | 23962.2    | 6.31    | 6    | 38  | 26.947 | 7      | 0      |  |
|                                                                                                                                                                                                                                                                                                                                                                                                                                                                                                                                                                                                                                                                                                                                                                                                                      | 5                                                                                                                                                                                                                                                                                                                                                                                                                                                                                                                      | l-Cys peroxiredoxin PER1/Rehydrin homolog/Thioredoxin p                                                          | gi 75324900                                                               | 23950.1    | 6.08    | 6    | 38  | 21.722 | 7      | 0      |  |
|                                                                                                                                                                                                                                                                                                                                                                                                                                                                                                                                                                                                                                                                                                                                                                                                                      | 6                                                                                                                                                                                                                                                                                                                                                                                                                                                                                                                      | Kinesin heavy chain isoform [Triticum aestivum], putative                                                        | gi 226434268                                                              | 31496.7    | 5.31    | 7    | 30  | 0      |        |        |  |
|                                                                                                                                                                                                                                                                                                                                                                                                                                                                                                                                                                                                                                                                                                                                                                                                                      | 7                                                                                                                                                                                                                                                                                                                                                                                                                                                                                                                      | Ent-copalyl diphosphate synthase [Triticum aestivum]                                                             | gi 226528027                                                              | 90143      | 5.88    | 10   | 28  | 0      |        |        |  |

|    |                                                                                                                                                                                                                                                                                                                                                                                                                                                                                                                                                          |                                                                                                      |              |          |      |    |     |        |     |       |
|----|----------------------------------------------------------------------------------------------------------------------------------------------------------------------------------------------------------------------------------------------------------------------------------------------------------------------------------------------------------------------------------------------------------------------------------------------------------------------------------------------------------------------------------------------------------|------------------------------------------------------------------------------------------------------|--------------|----------|------|----|-----|--------|-----|-------|
| 21 | 8                                                                                                                                                                                                                                                                                                                                                                                                                                                                                                                                                        | Heat shock protein HSP26 [Triticum aestivum]                                                         | gi 4028567   | 26482.4  | 9.36 | 6  | 26  | 0      |     |       |
|    | 9                                                                                                                                                                                                                                                                                                                                                                                                                                                                                                                                                        | Ribulose-1,5-bisphosphate carboxylase/oxygenase small subunit [Triticum aestivum]                    | gi 11990901  | 19448.8  | 8.81 | 5  | 24  | 0      |     |       |
|    | 10                                                                                                                                                                                                                                                                                                                                                                                                                                                                                                                                                       | Ribulose bisphosphate carboxylase small chain PW9, chloroplastic                                     | gi 132099    | 19441.7  | 8.52 | 5  | 24  | 0      |     |       |
|    | MRECISIHGQAGIQVGNACWELYCLEHGIQPDGQMPGDKTVGGDDAFNTFFSETGAGKHVPRAVFVDLEPTVIDEVRTGAYRQLFHPEQLISGKEDAANNFARGHYTIGKEIVDLCLDRIRKLSDNCTGLQGFLVFNAVGGG<br>TGSGLSGLLLERLSVDYGGKSKLGFTVYPPSPQVSTSVVEPYNSVLSTHSLLEHTDVSILLDNEAIYDICRRSLDIERPTYTNLNRLLVSVQVISSLTASLRFDGALNVDVNEFQTNLVPYPRIHFMLSSYAPVISAEEKAYHEQLSVAEIT<br>NSAFEPSSMMAKCDPRHGKYMACCLMYRGDVPKDVNAAVATIKTKRTIQFVDWCPTGFKCGINYQPPGVVPGGDLAKVQRAVCMISNSTSVVEVFSRIDHKFDLMYAKRAVFVHWYVGEEMEEGEFSEAREDLAALEKDY<br>EEVGAEFDEGEDGDEGDEY                                                                        |                                                                                                      |              |          |      |    |     |        |     |       |
|    | 1                                                                                                                                                                                                                                                                                                                                                                                                                                                                                                                                                        | Alpha tubulin-2A [Triticum aestivum]                                                                 | gi 90289596  | 49683.3  | 4.89 | 15 | 304 | 100    | 212 | 100   |
|    | 2                                                                                                                                                                                                                                                                                                                                                                                                                                                                                                                                                        | Tubulin alpha-3 chain                                                                                | gi 8928432   | 49697.4  | 4.89 | 15 | 304 | 100    | 212 | 100   |
|    | 3                                                                                                                                                                                                                                                                                                                                                                                                                                                                                                                                                        | Alpha tubulin-4A [Triticum aestivum]                                                                 | gi 90289610  | 49755.4  | 4.81 | 11 | 267 | 100    | 212 | 100   |
|    | 4                                                                                                                                                                                                                                                                                                                                                                                                                                                                                                                                                        | Alpha tubulin-1D [Triticum aestivum]                                                                 | gi 90289618  | 49579.5  | 4.95 | 10 | 171 | 100    | 124 | 100   |
|    | 5                                                                                                                                                                                                                                                                                                                                                                                                                                                                                                                                                        | Alpha tubulin-1B [Triticum aestivum]                                                                 | gi 90289622  | 49619.6  | 4.99 | 8  | 155 | 100    | 124 | 100   |
|    | 6                                                                                                                                                                                                                                                                                                                                                                                                                                                                                                                                                        | ATP synthase beta subunit [Triticum aestivum]                                                        | gi 525291    | 59211.9  | 5.56 | 6  | 93  | 100    | 74  | 100   |
| 22 | 7                                                                                                                                                                                                                                                                                                                                                                                                                                                                                                                                                        | Annexin [Triticum aestivum]                                                                          | gi 38606205  | 35416.1  | 9.01 | 8  | 46  | 86.397 | 11  | 0     |
|    | 8                                                                                                                                                                                                                                                                                                                                                                                                                                                                                                                                                        | Ribulose-bisphosphate carboxylase (EC 4.1.1.39) small chain precursor (clone 234) - wheat (fragment) | gi 82619     | 15344.9  | 8.95 | 6  | 41  | 57.962 |     |       |
|    | 9                                                                                                                                                                                                                                                                                                                                                                                                                                                                                                                                                        | Ribulose bisphosphate carboxylase small chain clone 512                                              | gi 132107    | 13046.5  | 5.84 | 5  | 33  | 0      |     |       |
|    | 10                                                                                                                                                                                                                                                                                                                                                                                                                                                                                                                                                       | Ribulose-1,5-bisphosphate carboxylase/oxygenase small subunit [Triticum aestivum]                    | gi 11990893  | 19500.8  | 9.06 | 6  | 32  | 0      |     |       |
|    | MRECISIHGQAGIQVGNACWELYCLEHGIQPDGQMPGDKTVGGDDAFNTFFSETGAGKHVPRAVFVDLEPTVIDEVRTGAYRQLFHPEQLISGKEDAANNFARGHYTIGKEIVDLCLDRIRKLSDNCTGLQGFLVFNAVGGG<br>TGSGLSGLLLERLSVDYGGKSKLGFTVYPPSPQVSTSVVEPYNSVLSTHSLLEHTDVSILLDNEAIYDICRRSLDIERPTYTNLNRLLVSVQVISSLTASLRFDGALNVDVNEFQTNLVPYPRIHFMLSSYAPVISAEEKAYHEQLSVAEIT<br>NSAFEPSSMMAKCDPRHGKYMACCLMYRGDVPKDVNAAVATIKTKRTIQFVDWCPTGFKCGINYQPPGVVPGGDLAKVQRAVCMISNSTSVVEVFSRIDHKFDLMYAKRAVFVHWYVGEEMEEGEFSEAREDLAALEKDY<br>EEVGAEFDEGEDGDEGDEY                                                                        |                                                                                                      |              |          |      |    |     |        |     |       |
|    | 1                                                                                                                                                                                                                                                                                                                                                                                                                                                                                                                                                        | Alpha tubulin-2A [Triticum aestivum]                                                                 | gi 90289596  | 49683.3  | 4.89 | 8  | 65  | 99.84  | 28  | 97.22 |
|    | 2                                                                                                                                                                                                                                                                                                                                                                                                                                                                                                                                                        | Tubulin alpha-3 chain                                                                                | gi 8928432   | 49697.4  | 4.89 | 7  | 57  | 99.101 | 28  | 97.22 |
|    | 3                                                                                                                                                                                                                                                                                                                                                                                                                                                                                                                                                        | Alpha tubulin-4A [Triticum aestivum]                                                                 | gi 90289610  | 49755.4  | 4.81 | 6  | 51  | 95.698 | 28  | 97.22 |
|    | 4                                                                                                                                                                                                                                                                                                                                                                                                                                                                                                                                                        | Ribulose-1,5-bisphosphate carboxylase/oxygenase small subunit [Triticum aestivum]                    | gi 11990893  | 19500.8  | 9.06 | 6  | 39  | 39.237 |     |       |
|    | 5                                                                                                                                                                                                                                                                                                                                                                                                                                                                                                                                                        | Ribulose-1,5-bisphosphate carboxylase/oxygenase small subunit [Triticum aestivum]                    | gi 11990897  | 19447.8  | 8.80 | 6  | 38  | 23.504 |     |       |
| 23 | 6                                                                                                                                                                                                                                                                                                                                                                                                                                                                                                                                                        | ADP-glucose pyrophosphorylase small subunit, plastid [Triticum aestivum]                             | gi 224021585 | 56253.8  | 6.40 | 8  | 34  | 0      |     |       |
|    | 7                                                                                                                                                                                                                                                                                                                                                                                                                                                                                                                                                        | Bowman-Birk trypsin inhibitor-like protein [Triticum aestivum]                                       | gi 162319710 | 9856.6   | 8.67 | 5  | 34  | 0      |     |       |
|    | 8                                                                                                                                                                                                                                                                                                                                                                                                                                                                                                                                                        | D1 protease precursor [Triticum aestivum]                                                            | gi 19774133  | 42003.6  | 5.72 | 7  | 32  | 0      |     |       |
|    | 9                                                                                                                                                                                                                                                                                                                                                                                                                                                                                                                                                        | 5-methylcytosine DNA glycosylase [Triticum aestivum]                                                 | gi 333471381 | 218295.3 | 6.06 | 15 | 30  | 0      |     |       |
|    | 10                                                                                                                                                                                                                                                                                                                                                                                                                                                                                                                                                       | Ribulose-1,5-bisphosphate carboxylase/oxygenase small subunit [Triticum aestivum]                    | gi 11990901  | 19448.8  | 8.81 | 5  | 30  | 0      |     |       |
|    | MAFRRLSAAVRRRSAAAAAAGNAREASTAVAAGPGVIGPDAPVRAPLMPYDRISEAVNARLRRLEHPDPRFLRYASPVPAHVHDHTAILAAPETRVTTLPNGLRVATESSLAARTATVGVWIDAGSRYEKDSQAGVAHFVEH<br>MLFKGTGMRTAGQLEQIEIDIGGHLNAYTSREQTYYAKVLDKDVPRALEVLADILQNSNLAEEIERERDVILREMEVEEGQSEEVIFDHLHATAFYQYTSRGPILGSADNVRSITQEDLKAYIKTHYTAPRMVITAAGAVKHE<br>DIVEQATKLFDKLSTDPSTTSMMLVDKEPASFTGSEVRIIDDDMPLAQFAVAFNGASWADPDSIALVMQTMLGSWNKSAGGKHMGSSELVQRVAINDIAESIMAFNTNYKDTGLFGVYAVAKADCLDDLAFAIMQEMSKLSYR<br>VTEEDVIRARNQLKSSIQHLHDGSTAVVEDIGRQLLIYGRRIPIELFARIDAVDPSTIRHVANRFIFDQDVAIAAMGPIQSLPDYNWFRRTYMLRY |                                                                                                      |              |          |      |    |     |        |     |       |
|    | 1                                                                                                                                                                                                                                                                                                                                                                                                                                                                                                                                                        | Predicted protein [Hordeum vulgare subsp. vulgare]                                                   | gi 326513540 | 58472.9  | 6.05 | 17 | 266 | 100    | 172 | 100   |
|    | 2                                                                                                                                                                                                                                                                                                                                                                                                                                                                                                                                                        | Mitochondrial-processing peptidase subunit beta-like [Brachypodium distachyon], predicted            | gi 357113428 | 58384.8  | 5.63 | 13 | 219 | 100    | 160 | 100   |
|    | 3                                                                                                                                                                                                                                                                                                                                                                                                                                                                                                                                                        | Hypothetical protein OsJ_09894 [Oryza sativa Japonica Group]                                         | gi 222624442 | 53597.1  | 5.18 | 10 | 200 | 100    | 160 | 100   |
|    | 4                                                                                                                                                                                                                                                                                                                                                                                                                                                                                                                                                        | Hypothetical protein OsI_10505 [Oryza sativa Indica Group]                                           | gi 125542883 | 58719.9  | 5.50 | 10 | 196 | 100    | 160 | 100   |
| 23 | 5                                                                                                                                                                                                                                                                                                                                                                                                                                                                                                                                                        | LOC100283246 [Zea mays]                                                                              | gi 226508302 | 58406.6  | 5.87 | 10 | 139 | 100    | 103 | 100   |
|    | 6                                                                                                                                                                                                                                                                                                                                                                                                                                                                                                                                                        | Uncharacterized protein LOC100191520 [Zea mays]                                                      | gi 212275227 | 58342.7  | 5.96 | 9  | 130 | 100    | 103 | 100   |
|    | 7                                                                                                                                                                                                                                                                                                                                                                                                                                                                                                                                                        | Hypothetical protein SORBIDRAFT_01g043060 [Sorghum bicolor]                                          | gi 242041787 | 58336.7  | 6.05 | 8  | 126 | 100    | 103 | 100   |
|    | 8                                                                                                                                                                                                                                                                                                                                                                                                                                                                                                                                                        | Floricaula protein [Misopates orontium]                                                              | gi 82734197  | 44863.4  | 6.06 | 13 | 66  | 72.186 |     |       |
|    | 9                                                                                                                                                                                                                                                                                                                                                                                                                                                                                                                                                        | Phosphoenolpyruvate carboxylase [Dendrobium loddigesii]                                              | gi 7768113   | 41211.6  | 9.32 | 12 | 65  | 66.56  |     |       |
|    | 10                                                                                                                                                                                                                                                                                                                                                                                                                                                                                                                                                       | hypothetical protein [Zea mays]                                                                      | gi 195615876 | 10109.2  | 6.26 | 7  | 64  | 62.48  |     |       |
|    | MFIESFKVESPNVRYGAGEIESEYRYDTTELTVHSHDGAASKWVVRPKSVNYHFKTNTTVPKLGVMVLVGWGGNNGSTLMAGVIANREGISWATKDKVQQANYFGSLTQASTIRVGSYNGEEIYAPFKSLPLMPVNPDDLVEFGGW<br>DISSMNLADAMTRTKVLDIDLQKQLRPYMESIVPLPGIYDPDFIAANQGSRRANNVIKGTKEQMEQIHKDIREFKEKNKVDKVVVLWTANTERYSNVSVGLNDTMENLLASVDKNEAEISPSTLYAIACVMEGVFPFINGSPQNTF<br>VPLGLDLAIKNCLIGDDDFKSGQTKMKSVLVDVFLVGAGIKPTSVSYNHLGNNDGMNLSAPOTFRSKEIKSNVVDMMVSSSAILYKPGHEPDRVVVIKYPVYVGDGSKRAMDEYTEIFMGGKSTIVLHNTCEDSLAAPHILD<br>LVLLAELSTRIQLKAEGEDKFHSFHPVATILSYLTAKPLVPPGTPVVNALAKQRAMLENIMRACVGLAPENNMLEYK              |                                                                                                      |              |          |      |    |     |        |     |       |
|    | 1                                                                                                                                                                                                                                                                                                                                                                                                                                                                                                                                                        | Myo-inositol-1-phosphate synthase [Triticum aestivum]                                                | gi 351767989 | 56086.6  | 5.64 | 20 | 822 | 100    | 663 | 100   |

|    |                                                                                                                                                                                                                                                                                                                                                                                                                                                                                                                                                                                                                     |                                                                                                     |              |          |      |    |     |        |     |        |
|----|---------------------------------------------------------------------------------------------------------------------------------------------------------------------------------------------------------------------------------------------------------------------------------------------------------------------------------------------------------------------------------------------------------------------------------------------------------------------------------------------------------------------------------------------------------------------------------------------------------------------|-----------------------------------------------------------------------------------------------------|--------------|----------|------|----|-----|--------|-----|--------|
| 24 | 2                                                                                                                                                                                                                                                                                                                                                                                                                                                                                                                                                                                                                   | Inositol-3-phosphate synthase/Myo-inositol-1-phosphate synthase                                     | gi 14548098  | 56258.6  | 5.38 | 8  | 30  | 0      |     |        |
|    | 3                                                                                                                                                                                                                                                                                                                                                                                                                                                                                                                                                                                                                   | High molecular weight glutenin subunit Dx5 [Triticum                                                | gi 343174543 | 13214.8  | 5.12 | 4  | 28  | 0      |     |        |
|    | 4                                                                                                                                                                                                                                                                                                                                                                                                                                                                                                                                                                                                                   | MYB-related protein [Triticum aestivum]                                                             | gi 359950756 | 60684.5  | 9.43 | 8  | 27  | 0      |     |        |
|    | 5                                                                                                                                                                                                                                                                                                                                                                                                                                                                                                                                                                                                                   | Pm3 [Triticum aestivum]                                                                             | gi 296280026 | 159148.2 | 6.30 | 16 | 24  | 0      |     |        |
|    | 6                                                                                                                                                                                                                                                                                                                                                                                                                                                                                                                                                                                                                   | Zinc finger protein [Triticum aestivum]                                                             | gi 255642812 | 47342.4  | 8.82 | 6  | 23  | 0      |     |        |
|    | 7                                                                                                                                                                                                                                                                                                                                                                                                                                                                                                                                                                                                                   | Glycosyltransferase, HGA-like [Triticum aestivum], putative,expressed                               | gi 300681530 | 68832    | 6.38 | 8  | 22  | 0      |     |        |
|    | 8                                                                                                                                                                                                                                                                                                                                                                                                                                                                                                                                                                                                                   | Ribulose-bisphosphate carboxylase (EC 4.1.1.39) small chain precursor (clone 234) - wheat (fragment | gi 82619     | 15344.9  | 8.95 | 4  | 22  | 0      |     |        |
|    | 9                                                                                                                                                                                                                                                                                                                                                                                                                                                                                                                                                                                                                   | Ribulosebisphosphate carboxylase [Triticum aestivum]                                                | gi 755804    | 18119.9  | 8.95 | 4  | 22  | 0      |     |        |
|    | 10                                                                                                                                                                                                                                                                                                                                                                                                                                                                                                                                                                                                                  | HMW glutenin subunit [Triticum aestivum]                                                            | gi 45533895  | 20813.4  | 5.15 | 4  | 22  | 0      |     |        |
|    | MAGPSSPSSTRPRRREGVENLFERMDRMVAHGPNFCBITWAGGSTADVTLDIANRMQNMVCVETMMHLTCTNMPVEKIDNALDTIKSNGIQNVLALRGDPHPGQDKFVQVAGGFSCALDLVEHIKAKYGDYFGITVAGY<br>PEAHPEVILGEEGATEEAYRKDLAYLKRKVDAGADVIVTQLFYDTDFLKFVNDCRQIGITCPIVPGIMPINNYKGFVRMTGFCKTKIPAEITAALDPIKDNEEAVKAYGIHLGTEMCKKILASGIKTLHLYTLNMEKTALAILMNL<br>GLIEESKLSRTLPRWPPTNVFRVKEDVRPIFWANRPKSYISRTTGWDQYPHGRWGDSRNPSYGALNDHQFTRPRGRGKKLQEEWAVPLKSVQDINERFVNFCGKLSKSPWSEL DGLQPETTIIDDQLVKINSKGFLTINSQPAVN<br>AEKSESPPSVGWGGPGGYVYQKAYVEFFCAKEKLGQLEKSAFPSLTYIAVKNKEGESISNIPANAVNAVTVGWVFPGEKIIQPTVVDASFMVMWKDEAFEIWSRGWACLFPEGDSSRELLEQIKSYYLVSLVDNDYISGDLFAAF<br>KEI |                                                                                                     |              |          |      |    |     |        |     |        |
| 25 | 1                                                                                                                                                                                                                                                                                                                                                                                                                                                                                                                                                                                                                   | 5,10-methylene-tetrahydrofolate reductase [Triticum monococcum]                                     | gi 115589742 | 64833.7  | 5.86 | 30 | 382 | 100    | 150 | 100    |
|    | 2                                                                                                                                                                                                                                                                                                                                                                                                                                                                                                                                                                                                                   | Os03g0815200 [Oryza sativa Japonica Group]                                                          | gi 115456165 | 66388.3  | 5.38 | 8  | 187 | 100    | 169 | 100    |
|    | 3                                                                                                                                                                                                                                                                                                                                                                                                                                                                                                                                                                                                                   | Methylenetetrahydrofolate reductase, 3-partial [Oryza sativa Japonica Group]                        | gi 37718877  | 41789    | 6.10 | 6  | 187 | 100    | 169 | 100    |
|    | 4                                                                                                                                                                                                                                                                                                                                                                                                                                                                                                                                                                                                                   | Hypothetical protein SORIDRAFT_01g003700 [Sorghum bicolor]                                          | gi 242032523 | 66298.5  | 5.73 | 11 | 151 | 100    | 115 | 100    |
|    | 5                                                                                                                                                                                                                                                                                                                                                                                                                                                                                                                                                                                                                   | Methylenetetrahydrofolate reductase 1 [Zea mays]                                                    | gi 162459521 | 66386.4  | 5.62 | 10 | 145 | 100    | 115 | 100    |
|    | 6                                                                                                                                                                                                                                                                                                                                                                                                                                                                                                                                                                                                                   | Methylenetetrahydrofolate reductase-like [Brachypodium distachyon], predicted                       | gi 357124307 | 66224.2  | 5.31 | 14 | 105 | 99.997 | 39  | 57.793 |
|    | 7                                                                                                                                                                                                                                                                                                                                                                                                                                                                                                                                                                                                                   | Methylenetetrahydrofolate reductase 2-like [Glycine max]                                            | gi 356517828 | 66893.6  | 5.60 | 10 | 64  | 59.797 | 36  | 13.765 |
|    | 8                                                                                                                                                                                                                                                                                                                                                                                                                                                                                                                                                                                                                   | Methylenetetrahydrofolate reductase [Populus trichocarpa]                                           | gi 224117802 | 67453.1  | 6.01 | 8  | 60  | 0      | 39  | 57.793 |
|    | 9                                                                                                                                                                                                                                                                                                                                                                                                                                                                                                                                                                                                                   | Methylenetetrahydrofolate reductase 2-like [Glycine max], predicted                                 | gi 356509485 | 66953.7  | 5.76 | 9  | 57  | 0      | 36  | 13.765 |
|    | 10                                                                                                                                                                                                                                                                                                                                                                                                                                                                                                                                                                                                                  | conserved hypothetical protein [Ricinus communis]                                                   | gi 255606550 | 5468.7   | 8.94 | 6  | 54  | 0      |     |        |
| 26 | MEFSPRAAELTTLLESRMNTFYTNFQVDEIGRVVSVGDGIARVYGLNEIQAGEMVEFASGVKGIALNLENENVGIVVFGSDTAIKEGDLVKRTGSIVDVPAGKAMLGRVVDALGVPIDGKGALSDHERRRVVVKAPGHIERKSV<br>HEPMQTGLKAVDSLVPGRGQRELIIGDRQTGKTAIAIDTILNQKQMSRGTNESETLYCVYVAIGQKRSTVAQLVQILSEANALEYSILVAATASDPAPLQFLAPYSGCAMGEYFRDNGMHALIIYDDLKQAVAYRQMSLLLR<br>PPGREAFPGDVFLYHLSRLLEAAKRSDDQTGAGSSTALPVETQAGDVSAYIPTNVISITDGGICLETFLYRGIRPAINVGLSVSRVGSAAQLKAMKQVCGSSKLELAQYREVAFAAQFGSDLDAATQALLNRGARLTEVPKQPQ<br>YEPLPIEKQIVVIYAANGFCDRMPLDRISQYEKAILSTINPELQKSFLEKGGLTNERKMEPDASLKESTLPYL                                                                                 |                                                                                                     |              |          |      |    |     |        |     |        |
|    | 1                                                                                                                                                                                                                                                                                                                                                                                                                                                                                                                                                                                                                   | ATP1 [Triticum aestivum]                                                                            | gi 81176509  | 55271.7  | 5.70 | 25 | 752 | 100    | 550 | 100    |
|    | 2                                                                                                                                                                                                                                                                                                                                                                                                                                                                                                                                                                                                                   | ATP synthase subunit alpha, mitochondrial                                                           | gi 114419    | 55229.6  | 5.70 | 24 | 487 | 100    | 299 | 100    |
|    | 3                                                                                                                                                                                                                                                                                                                                                                                                                                                                                                                                                                                                                   | Cold acclimation protein WCOR615 [Triticum aestivum]                                                | gi 1657857   | 17773.5  | 4.92 | 7  | 37  | 3.697  |     |        |
|    | 4                                                                                                                                                                                                                                                                                                                                                                                                                                                                                                                                                                                                                   | Glycosyltransferase, HGA-like [Triticum aestivum], putative,expressed                               | gi 300681530 | 68832    | 6.38 | 9  | 28  | 0      |     |        |
|    | 5                                                                                                                                                                                                                                                                                                                                                                                                                                                                                                                                                                                                                   | Expansin EXPB4 [Triticum aestivum]                                                                  | gi 44894802  | 29008.4  | 8.03 | 6  | 27  | 0      |     |        |
|    | 6                                                                                                                                                                                                                                                                                                                                                                                                                                                                                                                                                                                                                   | Conserved hypothetical protein, expressed [Triticum aestivum]                                       | gi 300681533 | 65462.9  | 9.33 | 8  | 25  | 0      |     |        |
|    | 7                                                                                                                                                                                                                                                                                                                                                                                                                                                                                                                                                                                                                   | Type 1 non specific lipid transfer protein precursor [Triticum aestivum]                            | gi 84617223  | 11139.6  | 9.20 | 4  | 25  | 0      |     |        |
|    | 8                                                                                                                                                                                                                                                                                                                                                                                                                                                                                                                                                                                                                   | Cyclophilin [Triticum aestivum]                                                                     | gi 82547214  | 13583.8  | 9.19 | 4  | 25  | 0      |     |        |
|    | 9                                                                                                                                                                                                                                                                                                                                                                                                                                                                                                                                                                                                                   | Non-specific lipid transfer protein 1 precursor [Triticum                                           | gi 94315719  | 11110.6  | 9.20 | 4  | 24  | 0      |     |        |
|    | 10                                                                                                                                                                                                                                                                                                                                                                                                                                                                                                                                                                                                                  | Phenylalanine ammonia-lyase                                                                         | gi 3024363   | 75889.5  | 6.10 | 9  | 24  | 0      | 6   | 0      |
| 27 | MVFSVTKKETKPYEGQKPGTSGLRKKVTVFQQPHYLANFVQSTFNALPADQVKGATIVVSGDGRYFSKDAVQIIAKMAAANGVRRVWVGQDSSLSTPAVSAIRERISADGAKATGAFILTASHNPGGPTDFGIKYNMGNGGP<br>APESVTDKIFSNKTIVTEYLLAEDLPNVDSIVIGVTSFTGPEGPFDDVDVDSATDYIKLMKTIKDFESIKLLASPKFSFCFDGLHGAVAGAYAKRMFVDELGASESSLNCPKEDFGGHPDPNLTAKELVDRMGLGKTSNVEP<br>PEFGAAADGDADRNMVLGKRFFVTPSDSVAIIAANAVQSIPYFASGLKGVARSMPTSAALDVAKNLNLKFFEVP TGWKFFGNLMDAGMCSVCGEESFGTGDHIREKDGIVAVLAWLSILAYKNKNDNLGDKLTVEDIVL<br>QHWATYGRHYTRYDYENVDAEAAKELMANLVKMQSSLDVNKSIKEIQPTVADVVSADFEYKDPVDGVSVKHQGIRYLF GDGSRVRLSGTGSVGATIRIYIEQYEKDSSTGRASSDALSPVDVALKFSKIKEYTGRSA<br>PTVIT             |                                                                                                     |              |          |      |    |     |        |     |        |
|    | 1                                                                                                                                                                                                                                                                                                                                                                                                                                                                                                                                                                                                                   | Phosphoglucomutase [Triticum aestivum]                                                              | gi 18076790  | 62749.8  | 5.66 | 19 | 762 | 100    | 641 | 100    |
|    | 2                                                                                                                                                                                                                                                                                                                                                                                                                                                                                                                                                                                                                   | NADP-dependent malic enzyme [Triticum aestivum]                                                     | gi 158701881 | 63049.4  | 5.56 | 14 | 65  | 99.854 |     |        |
|    | 3                                                                                                                                                                                                                                                                                                                                                                                                                                                                                                                                                                                                                   | Unnamed protein product [Triticum aestivum]                                                         | gi 300681516 | 13915.9  | 5.92 | 5  | 32  | 0      |     |        |
|    | 4                                                                                                                                                                                                                                                                                                                                                                                                                                                                                                                                                                                                                   | Glycosyltransferase, HGA-like [Triticum aestivum], putative,expressed                               | gi 300681530 | 68832    | 6.38 | 9  | 28  | 0      |     |        |
|    | 5                                                                                                                                                                                                                                                                                                                                                                                                                                                                                                                                                                                                                   | Ribulose-1,5-bisphosphate carboxylase/oxygenase small subunit [Aegilops longissima]                 | gi 4038673   | 18533.4  | 8.83 | 5  | 26  | 0      |     |        |
|    | 6                                                                                                                                                                                                                                                                                                                                                                                                                                                                                                                                                                                                                   | Ferritin 2C [Triticum aestivum]                                                                     | gi 210061155 | 22620.2  | 4.99 | 5  | 26  | 0      |     |        |



|                                                                                                                                              |                                                                                                                                                  |                                                                                            |              |         |       |     |     |     |        |     |
|----------------------------------------------------------------------------------------------------------------------------------------------|--------------------------------------------------------------------------------------------------------------------------------------------------|--------------------------------------------------------------------------------------------|--------------|---------|-------|-----|-----|-----|--------|-----|
| 28                                                                                                                                           | 7                                                                                                                                                | Mitogen-activated protein kinase MAPK1d [Triticum aestivum]                                | gi 84795224  | 42746.3 | 8.82  | 7   | 25  | 0   |        |     |
|                                                                                                                                              | 8                                                                                                                                                | Ribulose-1,5-bisphosphate carboxylase/oxygenase small subunit [Triticum aestivum]          | gi 11990897  | 19447.8 | 8.80  | 5   | 24  | 0   |        |     |
|                                                                                                                                              | 9                                                                                                                                                | Ribulose bisphosphate carboxylase small chain clone 512                                    | gi 132107    | 13046.5 | 5.84  | 4   | 24  | 0   |        |     |
|                                                                                                                                              | 10                                                                                                                                               | pTACR7 [Triticum aestivum]                                                                 | gi 12656895  | 11070.4 | 10.99 | 5   | 23  | 0   |        |     |
|                                                                                                                                              | MVFSVTKKETKPYEGQKPGTSLRKKVTVFQQPHYLANFVQSTFNALPADQVKGATIVVSGDGRYFSKDAVQIIAKMAAANGVRRVWVGQDSSLSTPAVSAIIRERISADGAKATGAFILTASHNPGGPTDFGIKYNMNGNGP   |                                                                                            |              |         |       |     |     |     |        |     |
|                                                                                                                                              | APESVTDKIFSNTKTVTEYLIAEDLPNVDISVIGVTSFTGPEGPFDVDFDSATDYIKLMKTIFDFESIKLLASPKFSFCFDGLHGAVAGAYAKRMFVDELGASESSLNCVPKEDFGGGHPDNLTYAKELVDRMGLGKTSNVPE  |                                                                                            |              |         |       |     |     |     |        |     |
|                                                                                                                                              | PEFGAAADGDADRNMVLGKRFFVTPSDSVAIIAANAVQSIPIYFASGLKGVARSMPTSAALDVAKNLNLKFFEVP TGWKFFGNLMDAGMCSVCGEESFGTGSDDHIREKDGIVAWLAWLSILAYKNKNDLGGDKLVTVEDIVL |                                                                                            |              |         |       |     |     |     |        |     |
|                                                                                                                                              | QHWATYGRHYTRYDYENVDAEAAKELMANLVKMQSSLSDVNSIKIEQPTVADVVSADFEFYKDPVDGSVSKHQGIRYLFGDGSRVFLRLSGTGSVGATIRIYIEQYKEDSSKTGRASSDALSPVLDVALKFSKIKEYTGRSA   |                                                                                            |              |         |       |     |     |     |        |     |
|                                                                                                                                              | PTVIT                                                                                                                                            |                                                                                            |              |         |       |     |     |     |        |     |
|                                                                                                                                              | 1                                                                                                                                                | Phosphoglucomutase [Triticum aestivum]                                                     | gi 18076790  | 62749.8 | 5.66  | 21  | 609 | 100 | 465    | 100 |
| 2                                                                                                                                            | NADP-dependent malic enzyme [Triticum aestivum]                                                                                                  | gi 158701881                                                                               | 63049.4      | 5.56    | 13    | 110 | 100 | 50  | 99.989 |     |
| 3                                                                                                                                            | Ribulose bisphosphate carboxylase small chain clone 512                                                                                          | gi 132107                                                                                  | 13046.5      | 5.84    | 5     | 33  | 0   |     |        |     |
| 4                                                                                                                                            | Ribulose-1,5-bisphosphate carboxylase/oxygenase small subunit [Triticum aestivum]                                                                | gi 11990897                                                                                | 19447.8      | 8.80    | 6     | 32  | 0   |     |        |     |
| 5                                                                                                                                            | Ribulosebisphosphate carboxylase [Triticum aestivum]                                                                                             | gi 755804                                                                                  | 18119.9      | 8.95    | 5     | 30  | 0   |     |        |     |
| 6                                                                                                                                            | Ribulose-bisphosphate carboxylase (EC 4.1.1.39) small chain precursor (clone 234) - wheat (fragment                                              | gi 82619                                                                                   | 15344.9      | 8.95    | 5     | 29  | 0   |     |        |     |
| 7                                                                                                                                            | Protein serine/threonine kinase [Triticum aestivum]                                                                                              | gi 310723069                                                                               | 51387.9      | 8.09    | 7     | 24  | 0   |     |        |     |
| 8                                                                                                                                            | Ribulose-1,5-bisphosphate carboxylase/oxygenase small subunit [Triticum aestivum]                                                                | gi 11990893                                                                                | 19500.8      | 9.06    | 5     | 24  | 0   |     |        |     |
| 9                                                                                                                                            | Unnamed protein product [Triticum aestivum]                                                                                                      | gi 300681516                                                                               | 13915.9      | 5.92    | 4     | 24  | 0   |     |        |     |
| 10                                                                                                                                           | Glycosyltransferase, HGA-like [Triticum aestivum], putative,expressed                                                                            | gi 300681530                                                                               | 68832        | 6.38    | 8     | 23  | 0   |     |        |     |
| 29                                                                                                                                           | MVFSVTKKETKPYEGQKPGTSLRKKVTVFQQPHYLANFVQSTFNALPADQVKGATIVVSGDGRYFSKDAVQIIAKMAAANGVRRVWVGQDSSLSTPAVSAIIRERISADGAKATGAFILTASHNPGGPTDFGIKYNMNGNGP   |                                                                                            |              |         |       |     |     |     |        |     |
|                                                                                                                                              | APESVTDKIFSNTKTVTEYLIAEDLPNVDISVIGVTSFTGPEGPFDVDFDSATDYIKLMKTIFDFESIKLLASPKFSFCFDGLHGAVAGAYAKRMFVDELGASESSLNCVPKEDFGGGHPDNLTYAKELVDRMGLGKTSNVPE  |                                                                                            |              |         |       |     |     |     |        |     |
|                                                                                                                                              | PEFGAAADGDADRNMVLGKRFFVTPSDSVAIIAANAVQSIPIYFASGLKGVARSMPTSAALDVAKNLNLKFFEVP TGWKFFGNLMDAGMCSVCGEESFGTGSDDHIREKDGIVAWLAWLSILAYKNKNDLGGDKLVTVEDIVL |                                                                                            |              |         |       |     |     |     |        |     |
|                                                                                                                                              | QHWATYGRHYTRYDYENVDAEAAKELMANLVKMQSSLSDVNSIKIEQPTVADVVSADFEFYKDPVDGSVSKHQGIRYLFGDGSRVFLRLSGTGSVGATIRIYIEQYKEDSSKTGRASSDALSPVLDVALKFSKIKEYTGRSA   |                                                                                            |              |         |       |     |     |     |        |     |
|                                                                                                                                              | PTVIT                                                                                                                                            |                                                                                            |              |         |       |     |     |     |        |     |
|                                                                                                                                              | 1                                                                                                                                                | Phosphoglucomutase [Triticum aestivum]                                                     | gi 18076790  | 62749.8 | 5.66  | 26  | 879 | 100 | 673    | 100 |
|                                                                                                                                              | 2                                                                                                                                                | Unnamed protein product [Triticum aestivum]                                                | gi 300681516 | 13915.9 | 5.92  | 5   | 32  | 0   |        |     |
|                                                                                                                                              | 3                                                                                                                                                | Nuclear transcription factor 1 [Triticum aestivum]                                         | gi 313575761 | 22026.9 | 8.11  | 6   | 29  | 0   |        |     |
|                                                                                                                                              | 4                                                                                                                                                | Serine/threonine protein kinase [Triticum aestivum]                                        | gi 14571547  | 45928.1 | 8.39  | 7   | 27  | 0   |        |     |
|                                                                                                                                              | 5                                                                                                                                                | Mitogen-activated protein kinase MAPK1d [Triticum aestivum]                                | gi 84795224  | 42746.3 | 8.82  | 7   | 24  | 0   |        |     |
| 6                                                                                                                                            | Ribulose bisphosphate carboxylase small chain clone 512                                                                                          | gi 132107                                                                                  | 13046.5      | 5.84    | 4     | 24  | 0   |     |        |     |
| 7                                                                                                                                            | Protein serine/threonine kinase [Triticum aestivum]                                                                                              | gi 310723069                                                                               | 51387.9      | 8.09    | 7     | 24  | 0   |     |        |     |
| 8                                                                                                                                            | pTACR7 [Triticum aestivum]                                                                                                                       | gi 12656895                                                                                | 11070.4      | 10.99   | 5     | 23  | 0   |     |        |     |
| 9                                                                                                                                            | Resistance-related receptor-like kinase [Triticum aestivum]                                                                                      | gi 116008311                                                                               | 72503.7      | 7.10    | 8     | 22  | 0   |     |        |     |
| 10                                                                                                                                           | Glycosyltransferase, HGA-like [Triticum aestivum], putative,expressed                                                                            | gi 300681530                                                                               | 68832        | 6.38    | 8     | 22  | 0   |     |        |     |
| 30                                                                                                                                           | MSPQETKAGVGFKAGVKDYKLTYYTPEYETKDTDILAAFRVSPQPGVPPEEAGAAVAEASSTGTWTTVWTDGLTSLDRYKGRCYHIEPVAGEDSQWICYVAYPLDLFEESGVTNMFTSIVGNVFGFKALRALRLLEDLRIPPTY |                                                                                            |              |         |       |     |     |     |        |     |
|                                                                                                                                              | SKTFQGPPIHGQVERDKLNKYGRPLLGCTIKPKLGLSAKNYGRACYELCRGGLDFTKDDENVNSQPFMRWRDRFVFCAEAIYKSAQETGEIKGHYLNATAGTCEEMIKRAVFARELGVPIVMHDYLTGGFTANTTLAHYCRD   |                                                                                            |              |         |       |     |     |     |        |     |
|                                                                                                                                              | NGLLLIHHRAMHVAIDRQKNHGMHFRVLAKALRMSGDDHIHSGTVVGKLEGEREMTLRGFDLLRDFIEKDRARGIFFTQDWVSMGPVVPKASGGIHWHPALTEIFGDDSVLQFGGGTLGHPWGNAPGAAANRVALEAC       |                                                                                            |              |         |       |     |     |     |        |     |
|                                                                                                                                              | VQARNEGRDLAREGNEIRAACKWSPELAAACEVWKAIFEFEPVDITDK                                                                                                 |                                                                                            |              |         |       |     |     |     |        |     |
|                                                                                                                                              | 1                                                                                                                                                | Ribulose-1,5-bisphosphate carboxylase/oxygenase large subunit [Triticum aestivum]          | gi 14017580  | 52817.4 | 6.22  | 20  | 592 | 100 | 406    | 100 |
|                                                                                                                                              | 2                                                                                                                                                | Ribulose-1,5-bisphosphate carboxylase/oxygenase large subunit [Triticum aestivum]          | gi 32966580  | 52757.3 | 6.22  | 19  | 578 | 100 | 406    | 100 |
|                                                                                                                                              | 3                                                                                                                                                | Ribulose-1,5-bisphosphate carboxylase/oxygenase large subunit [Triticum aestivum]          | gi 12344     | 46972.5 | 6.60  | 17  | 503 | 100 | 353    | 100 |
|                                                                                                                                              | 4                                                                                                                                                | Ribulose-1,5-bisphosphate carboxylase/oxygenase large subunit [Triticum aestivum]          | gi 339742637 | 21900   | 7.57  | 8   | 269 | 100 | 198    | 100 |
|                                                                                                                                              | 5                                                                                                                                                | Ribulose-1,5-bisphosphate carboxylase/oxygenase large subunit, partial [Triticum aestivum] | gi 313664567 | 22368.2 | 5.78  | 8   | 268 | 100 | 198    | 100 |
|                                                                                                                                              | 6                                                                                                                                                | VIVIPAROUS1 protein [Triticum aestivum]                                                    | gi 7801372   | 73395.2 | 8.63  | 8   | 34  | 0   | 12     | 0   |
| 7                                                                                                                                            | Viviparous 1 protein [Triticum aestivum]                                                                                                         | gi 219819649                                                                               | 72598.7      | 8.16    | 8     | 34  | 0   | 12  | 0      |     |
| 8                                                                                                                                            | VIVIPAROUS1 protein [Triticum aestivum]                                                                                                          | gi 94962615                                                                                | 72756.8      | 8.44    | 8     | 34  | 0   | 12  | 0      |     |
| 9                                                                                                                                            | VIVIPAROUS1 protein [Triticum aestivum]                                                                                                          | gi 7801376                                                                                 | 73086.9      | 8.44    | 7     | 28  | 0   | 12  | 0      |     |
| 10                                                                                                                                           | Starch synthase IIIb precursor [Triticum aestivum]                                                                                               | gi 189096677                                                                               | 14134.1      | 5.13    | 10    | 27  | 0   |     |        |     |
| MADANAPFALSRLSPAARLPRAWRAARPAPLSTGGRTPLSVASAAQENRDNDSVDVQVSQAQNAQNQQGNAVQRRPRRAGFDISPGFLVDPMSPMRTMRQMLDITMDRLFDDAVGFPTARRSLAAASEMPRMPWDIMEDD |                                                                                                                                                  |                                                                                            |              |         |       |     |     |     |        |     |
| KEVKMRFDMPLSGREEVKVMVEGDALVIRGEHKKKEAGEGOGEEAEGGDGWWKERSVSSYDMRLALPDECDKSQVRAELKNGVLLVSPKRETERKVIDVKVQ                                       |                                                                                                                                                  |                                                                                            |              |         |       |     |     |     |        |     |

|    |                                                                                                                                                                                                                                                                                                                                                                                                                                         |                                                                                                      |              |          |       |    |     |        |     |        |
|----|-----------------------------------------------------------------------------------------------------------------------------------------------------------------------------------------------------------------------------------------------------------------------------------------------------------------------------------------------------------------------------------------------------------------------------------------|------------------------------------------------------------------------------------------------------|--------------|----------|-------|----|-----|--------|-----|--------|
| 31 | 1                                                                                                                                                                                                                                                                                                                                                                                                                                       | Heat shock protein HSP26 [Triticum aestivum]                                                         | gi 4028569   | 26857.5  | 7.85  | 5  | 45  | 83.264 | 28  | 97.862 |
|    | 2                                                                                                                                                                                                                                                                                                                                                                                                                                       | Phosphoenolpyruvate carboxylase [Triticum aestivum]                                                  | gi 3341490   | 110082.5 | 5.61  | 7  | 33  | 0      | 23  | 92.327 |
|    | 3                                                                                                                                                                                                                                                                                                                                                                                                                                       | Dehydroascorbate reductase [Triticum aestivum]                                                       | gi 259017810 | 23343.1  | 5.88  | 6  | 31  | 0      |     |        |
|    | 4                                                                                                                                                                                                                                                                                                                                                                                                                                       | Cold-regulated protein 15b [Arabidopsis thaliana]                                                    | gi 15227952  | 14951.7  | 6.62  | 5  | 30  | 0      |     |        |
|    | 5                                                                                                                                                                                                                                                                                                                                                                                                                                       | DEP1 [Triticum aestivum]                                                                             | gi 208293840 | 31669.2  | 8.29  | 8  | 28  | 0      |     |        |
|    | 6                                                                                                                                                                                                                                                                                                                                                                                                                                       | Ribulose-bisphosphate carboxylase (EC 4.1.1.39) small chain precursor (clone 234) - wheat (fragment) | gi 82619     | 15344.9  | 8.95  | 5  | 27  | 0      |     |        |
|    | 7                                                                                                                                                                                                                                                                                                                                                                                                                                       | P450 [Triticum aestivum]                                                                             | gi 51572463  | 59563.8  | 7.10  | 9  | 25  | 0      |     |        |
|    | 8                                                                                                                                                                                                                                                                                                                                                                                                                                       | Serine/threonine protein kinase Stpk-D [Triticum aestivum]                                           | gi 333385001 | 44526.8  | 7.63  | 7  | 25  | 0      |     |        |
|    | 9                                                                                                                                                                                                                                                                                                                                                                                                                                       | PDI-like protein [Triticum aestivum], putative                                                       | gi 299469376 | 40249.9  | 6.17  | 7  | 25  | 0      |     |        |
|    | 10                                                                                                                                                                                                                                                                                                                                                                                                                                      | 40S ribosomal protein [Triticum aestivum]                                                            | gi 307941401 | 14750.9  | 9.90  | 5  | 24  | 0      |     |        |
| 32 | MAQAVVPAMQCQVGVGRSAVPAQAGRVWGVRRRTARAASGFKVLALGPETTGVIQRMQQLLDMDTTPFTDKIIAEYIWVGGSGIDLRSKSRITSKPVEDPSELPKWNYDGSSTGQAPGEDSEVILYPQAIKDPFRGGNNILVICDTYTPQGEPIPTNKRHMAAQIFSDPKVTSQVPWFGIEQEYTLMQRDVNWPLGWVPGGYPGPQGPYYCAVGSKSFGRDISDAHYKACLYAGIEISGTNGEVMPPQWVEYQVGPVSGIDAGDHIWASRYILERITEQAGVVLTLDPKPIQGDWNGAGCHTNTYSLSMREDGGFDVIKKAILNLSLRHDLHIAAYGEGNERRLTGLHETASISDFSWGVANRGCSIRVGRETEAKGKGYLEDRRPASNMDPYTVTALLAETTLWEPTLEAEALAAKKLALKV |                                                                                                      |              |          |       |    |     |        |     |        |
|    | 1                                                                                                                                                                                                                                                                                                                                                                                                                                       | Glutamine synthetase 2 [Triticum aestivum], plastid                                                  | gi 251832986 | 46659.4  | 5.75  | 22 | 891 | 100    | 699 | 100    |
|    | 2                                                                                                                                                                                                                                                                                                                                                                                                                                       | Glutamine synthetase 2 [Triticum aestivum], plastid                                                  | gi 251832993 | 46643.4  | 5.75  | 22 | 860 | 100    | 668 | 100    |
|    | 3                                                                                                                                                                                                                                                                                                                                                                                                                                       | Glutamine synthetase isoform GS2b [Triticum aestivum], plastid                                       | gi 71362638  | 46615.5  | 6.04  | 19 | 674 | 100    | 522 | 100    |
|    | 4                                                                                                                                                                                                                                                                                                                                                                                                                                       | Glutamine synthetase isoform GS2a [Triticum aestivum], plastid                                       | gi 71362455  | 46659.3  | 5.42  | 18 | 332 | 100    | 197 | 100    |
|    | 5                                                                                                                                                                                                                                                                                                                                                                                                                                       | Glutamine synthetase isoform GSr1 [Triticum aestivum]                                                | gi 40317416  | 38705.3  | 5.35  | 3  | 156 | 100    | 146 | 100    |
|    | 6                                                                                                                                                                                                                                                                                                                                                                                                                                       | Glutamine synthetase isoform GS1c [Triticum aestivum]                                                | gi 71361904  | 39216.6  | 5.41  | 3  | 154 | 100    | 144 | 100    |
|    | 7                                                                                                                                                                                                                                                                                                                                                                                                                                       | Glutamine synthetase isoform GSr2 [Triticum aestivum]                                                | gi 40317418  | 38633.2  | 5.34  | 2  | 153 | 100    | 146 | 100    |
|    | 8                                                                                                                                                                                                                                                                                                                                                                                                                                       | Glycosyltransferase, HGA-like [Triticum aestivum], putative,expressed                                | gi 300681530 | 68832    | 6.38  | 11 | 43  | 75.246 |     |        |
|    | 9                                                                                                                                                                                                                                                                                                                                                                                                                                       | Putative protein [Triticum aestivum]                                                                 | gi 283099379 | 57999.7  | 5.26  | 8  | 29  | 0      |     |        |
| 33 | 10                                                                                                                                                                                                                                                                                                                                                                                                                                      | Glutathione transferase [Triticum aestivum]                                                          | gi 20067419  | 24995.9  | 6.35  | 3  | 28  | 0      | 20  | 88.594 |
|    | MAIPANAAATSLSPFVIHMEKLETEERGAAMEVIRDACENWGGFELLNHGISHELMDEVERVSKAHYAACREEQFKEFAARTLEAGEKGADVKDQVDWESTFFVRHLPASNLADLPNLDHHYRQVMKEFASEIEKLAEKVLDLCLNEGLEEGYLKRAFTGNSNGPTFGTKVSSYPPCPRPDLVDGLRAHTDAGGVILLFQDDQVSGLQLLDKGAWVDVPPMRHAVVNIGDQLEVITNGRYKSVMHVRVLRTPDGNRMSIASFYNPAGADAVIFPAPALMGAAEAAGKNEEGETAIEYPSVFEDYMNLYLRHKFEAKEPRFEAMKVDAPIATV                                                                                            |                                                                                                      |              |          |       |    |     |        |     |        |
|    | 1                                                                                                                                                                                                                                                                                                                                                                                                                                       | Predicted protein [Hordeum vulgare subsp. vulgare]                                                   | gi 326512860 | 36765.2  | 4.96  | 11 | 132 | 100    | 71  | 99.977 |
|    | 2                                                                                                                                                                                                                                                                                                                                                                                                                                       | Predicted protein [Hordeum vulgare subsp. vulgare]                                                   | gi 326522108 | 36658.3  | 5.08  | 9  | 114 | 100    | 71  | 99.977 |
|    | 3                                                                                                                                                                                                                                                                                                                                                                                                                                       | uncharacterized protein LOC100191321 [Zea mays]                                                      | gi 212274981 | 35273.5  | 4.89  | 5  | 77  | 97.739 | 59  | 99.618 |
|    | 4                                                                                                                                                                                                                                                                                                                                                                                                                                       | unknown [Zea mays]                                                                                   | gi 194701382 | 21774    | 5.12  | 3  | 71  | 91.792 | 59  | 99.618 |
|    | 5                                                                                                                                                                                                                                                                                                                                                                                                                                       | hypothetical protein VOLCADRAFT_86598 [Volvox]                                                       | gi 302829949 | 80365.4  | 5.24  | 8  | 62  | 31.725 | 47  | 93.324 |
|    | 6                                                                                                                                                                                                                                                                                                                                                                                                                                       | predicted protein [Micromonas pusilla CCMP1545]                                                      | gi 303285780 | 66000.5  | 5.51  | 15 | 62  | 31.725 |     |        |
|    | 7                                                                                                                                                                                                                                                                                                                                                                                                                                       | ACC oxidase [Alstroemeria peruviana]                                                                 | gi 50845230  | 8075.3   | 5.98  | 2  | 55  | 0      | 43  | 84.314 |
|    | 8                                                                                                                                                                                                                                                                                                                                                                                                                                       | phenylalanine ammonia-lyase [Ginkgo biloba]                                                          | gi 156118600 | 79058.2  | 5.96  | 14 | 53  | 0      |     |        |
|    | 9                                                                                                                                                                                                                                                                                                                                                                                                                                       | calmodulin-binding motif family protein [Micromonas pusilla CCMP1545]                                | gi 303291411 | 49738    | 10.36 | 7  | 52  | 0      | 38  | 50.053 |
| 34 | 10                                                                                                                                                                                                                                                                                                                                                                                                                                      | Os03g0153500 [Oryza sativa Japonica Group]                                                           | gi 297600348 | 43468.2  | 6.34  | 7  | 51  | 0      |     |        |
|    | MASLADLVNLDLSDCTDKIIVEYLWVGGSGIDIRSKARTVNGPITDASQLPKWNYDGSSTGQAPGEDSEVILYPQAIKDPFRRGDNLVMCDCTYTPQGVPIPTNKRHNAAKIFNTPKVA AEETWYGIEQEYTLQKQDVNWPLGWPIGGYPGPQGPYYCAAGADKAFGRDIVDAHYKACLYAGINISGINGEVMPQWVEFQVGPVSGIAASDQLWVARYILERITEVAGVLSLDPKPIPGDWNGAGAHTNYSTKSMREAGGYEVIKTAIEKLKGRHAQHIAAYGEGNERRLTGHHETADINTFKWGVADRGASVRVGRDTEKDGKGYFEDRRPASNMDPYVVTSMIAETLLLL                                                                       |                                                                                                      |              |          |       |    |     |        |     |        |
|    | 1                                                                                                                                                                                                                                                                                                                                                                                                                                       | glutamine synthetase isoform GSr1 [Triticum aestivum]                                                | gi 40317416  | 38705.3  | 5.35  | 14 | 711 | 100    | 608 | 100    |
|    | 2                                                                                                                                                                                                                                                                                                                                                                                                                                       | glutamine synthetase isoform GSr2 [Triticum aestivum]                                                | gi 40317418  | 38633.2  | 5.34  | 14 | 614 | 100    | 511 | 100    |
|    | 3                                                                                                                                                                                                                                                                                                                                                                                                                                       | glutamine synthetase isoform GS1a [Triticum aestivum]                                                | gi 71361900  | 39172.6  | 5.41  | 11 | 205 | 100    | 140 | 100    |
|    | 4                                                                                                                                                                                                                                                                                                                                                                                                                                       | glutamine synthetase isoform GS1b [Triticum aestivum]                                                | gi 71361902  | 39188.6  | 5.41  | 10 | 196 | 100    | 140 | 100    |
|    | 5                                                                                                                                                                                                                                                                                                                                                                                                                                       | Glutamine synthetase isoform GS2c [Triticum aestivum], plastid                                       | gi 71362640  | 46673.4  | 5.75  | 4  | 154 | 100    | 142 | 100    |
|    | 6                                                                                                                                                                                                                                                                                                                                                                                                                                       | yellow rust resistance protein, partial [Triticum aestivum]                                          | gi 375127084 | 17187.8  | 6.36  | 5  | 30  | 0      |     |        |
|    | 7                                                                                                                                                                                                                                                                                                                                                                                                                                       | Chromomethylase MTH2 [Triticum aestivum], putative                                                   | gi 16755865  | 10159.1  | 8.80  | 5  | 30  | 0      |     |        |
|    | 8                                                                                                                                                                                                                                                                                                                                                                                                                                       | glycosyltransferase, HGA-like, putative,expressed                                                    | gi 300681530 | 68832    | 6.38  | 9  | 29  | 0      |     |        |
|    | 9                                                                                                                                                                                                                                                                                                                                                                                                                                       | Chromomethylase MTH1 [Triticum aestivum], putative                                                   | gi 16755863  | 12117.2  | 9.60  | 5  | 28  | 0      |     |        |
|    | 10                                                                                                                                                                                                                                                                                                                                                                                                                                      | polyphenol oxidase [Triticum aestivum]                                                               | gi 118131878 | 25104    | 5.26  | 5  | 26  | 0      |     |        |

|    |                                                                                                                                                                                                                                                                                                                                                                                                                                                        |                                                                                   |              |          |       |    |     |     |     |        |
|----|--------------------------------------------------------------------------------------------------------------------------------------------------------------------------------------------------------------------------------------------------------------------------------------------------------------------------------------------------------------------------------------------------------------------------------------------------------|-----------------------------------------------------------------------------------|--------------|----------|-------|----|-----|-----|-----|--------|
| 35 | MADGEDIQPLVCDNGTGMVKAGFAGDDAPRAVFPISVGRPRHTGVMVGMGQKDAYVGDEAQSKRGILTLYPIEHGIVSNWDDMEKIWHHTFYNELRVAPEEHPVLLTEAPLNPKANREKMTQIMFETFNVPAMYVAIQAVLSLYASGRTTGIVLDSGDGVSHVTPIYIEGYALPHAILRLDLAGRDLTDSLMIKILTERGYSFTTSAEREIVRDIKEKLAYVALDYEQELETAKNSSSVEKSYELPDGQVITIGAERFRCPEVLFPQSMIGMESSGIIHETTYSIMKCDVDIRKDLYGNIIVLSGGTTFMFGIADRMSEKITALAPSSMKIKVVAPPERKYSVWIGGSILASLSTFQQMWISKDEYDESGPAIVHRKCF                                                            |                                                                                   |              |          |       |    |     |     |     |        |
|    | 1                                                                                                                                                                                                                                                                                                                                                                                                                                                      | Actin-97-like [Brachypodium distachyon], Ppredicted                               | gi 357135037 | 41700.9  | 5.23  | 16 | 752 | 100 | 634 | 100    |
|    | 2                                                                                                                                                                                                                                                                                                                                                                                                                                                      | actin [Triticum aestivum]                                                         | gi 255684860 | 28061.3  | 5.34  | 11 | 666 | 100 | 583 | 100    |
|    | 3                                                                                                                                                                                                                                                                                                                                                                                                                                                      | actin-like protein [Triticum aestivum]                                            | gi 37694729  | 21402.8  | 4.84  | 5  | 410 | 100 | 381 | 100    |
|    | 5                                                                                                                                                                                                                                                                                                                                                                                                                                                      | actin [Triticum aestivum]                                                         | gi 371927227 | 14740.3  | 5.16  | 5  | 33  | 0   |     |        |
|    | 6                                                                                                                                                                                                                                                                                                                                                                                                                                                      | reverse transcriptase [Triticum aestivum]                                         | gi 15723989  | 29343.8  | 8.53  | 7  | 27  | 0   |     |        |
|    | 7                                                                                                                                                                                                                                                                                                                                                                                                                                                      | abscisic acid-induced protein [Triticum aestivum]                                 | gi 32400834  | 10950.2  | 11.74 | 4  | 24  | 0   |     |        |
|    | 8                                                                                                                                                                                                                                                                                                                                                                                                                                                      | RING finger protein [Triticum aestivum]                                           | gi 353167263 | 16927.8  | 8.04  | 3  | 23  | 0   | 12  | 22.746 |
|    | 9                                                                                                                                                                                                                                                                                                                                                                                                                                                      | aestivum stearyl-ACP desaturase [Triticum aestivum]                               | gi 319739542 | 44610.4  | 6.05  | 6  | 23  | 0   |     |        |
|    | 10                                                                                                                                                                                                                                                                                                                                                                                                                                                     | SNF2 family N-terminal domain protein, partial [Triticum aestivum]                | gi 129282525 | 7972.2   | 5.76  | 3  | 23  | 0   |     |        |
| 36 | MAAVDTFLFTSESVNEGHPDKLCDQISDAVLDACLAEDPDSKVACETCTCTNMVMVFGEITTKANVDYKIVRDTCRGIGFVSNVDVGLDADHCKVLVNIEQQSPDIAQGVHGHFTKRPEEIGAGDQGHMFYGATDETPEFMPLSHVLATKLGARLLEVRKNATCPWLRPDGKTQVTVEYHNDNGAMVPIRVHTVLSTQHDVETVNDIEAADLKEHVIKVPIPEQYLDENTIFHLNPSGRFVIGGPHGDAGLTGRKIIIDTYGGWGAHGGGAFSGKDPTKVDRSGAYVARQAAKSIVASGIARRCIVQVSYAIGVPEPLSVFVDVTYGTGKIPDKLEIVKENFDFRPGMIIINLDLKRGGKGGRYLKTAAYGHFGREGADFTWEVVKPLKWEKPSA                                            |                                                                                   |              |          |       |    |     |     |     |        |
|    | 1                                                                                                                                                                                                                                                                                                                                                                                                                                                      | S-adenosylmethionine synthase/Methionine adenos                                   | gi 223635315 | 43152.7  | 5.55  | 4  | 109 | 100 | 98  | 100    |
|    | 2                                                                                                                                                                                                                                                                                                                                                                                                                                                      | Axi 1 like protein [Triticum aestivum], putative                                  | gi 300681428 | 48037.3  | 9.23  | 9  | 32  | 0   |     |        |
|    | 3                                                                                                                                                                                                                                                                                                                                                                                                                                                      | Axi 1 like protein [Triticum aestivum], putative                                  | gi 300681427 | 61972.6  | 9.45  | 10 | 32  | 0   |     |        |
|    | 4                                                                                                                                                                                                                                                                                                                                                                                                                                                      | Rps3 [Triticum aestivum]                                                          | gi 291498608 | 64167.2  | 10.41 | 10 | 30  | 0   |     |        |
|    | 5                                                                                                                                                                                                                                                                                                                                                                                                                                                      | Rps3 [Triticum aestivum]                                                          | gi 81687782  | 64135.2  | 10.39 | 10 | 29  | 0   |     |        |
|    | 6                                                                                                                                                                                                                                                                                                                                                                                                                                                      | Starch synthase IIIB precursor [Triticum aestivum]                                | gi 189096677 | 143134.1 | 5.13  | 9  | 28  | 0   | 17  | 74.788 |
|    | 7                                                                                                                                                                                                                                                                                                                                                                                                                                                      | Fatty acyl coA reductase [Triticum aestivum]                                      | gi 22003090  | 57224.5  | 7.31  | 6  | 27  | 0   | 10  | 0      |
|    | 8                                                                                                                                                                                                                                                                                                                                                                                                                                                      | Dsulfide oxidoreductase [Triticum aestivum], putative, expressed                  | gi 300681588 | 57533.6  | 6.30  | 6  | 26  | 0   | 10  | 0      |
|    | 9                                                                                                                                                                                                                                                                                                                                                                                                                                                      | Tsn1 [Triticum durum]                                                             | gi 296033920 | 168126.7 | 6.62  | 15 | 26  | 0   |     |        |
| 37 | 10                                                                                                                                                                                                                                                                                                                                                                                                                                                     | Pyridoxine biosynthesis protein [Triticum aestivum]                               | gi 74026503  | 33277.1  | 6.40  | 6  | 25  | 0   | 2   | 0      |
|    | MAAAKSVDRLAQRVLTPAEPTPAGPLRLSWLDRYPTQMALIESLHVFKPAPDRDGGDAGPAGTIERALAAQALVQYYPLAGRLGFTTEEGLLQVDCGGGGSGVWFTEAAAGCALEDVEYLEHPMMIAKDELPPPTAQEEDARKLVLVQVTTTFACGGFVVGFRFHAVADGPGAAQFMAAVGELARGRTAEGLTVEPQWGREAIPDPAGAVIGSLPSPAGAKRLEYLAMDISADYINHFKSQYNSSHTGSWCSAFEVLVAKAWQSRTRAAGFEEDSIVHLCFAMNARPLLHASLPRAGAGFYGNCYYIMRVSAAPAGKVAGSTIPEVVKIHKDGKRRMPSEFGRWATGEAGADGGVDPYQITSYRRTLVSVDWTRLGFAEVDYDGWGPAPHVPLTNLDYIATCILVKPWAHKPGARLITQCVTDPDRIAAFHEGMLDMN |                                                                                   |              |          |       |    |     |     |     |        |
|    | 1                                                                                                                                                                                                                                                                                                                                                                                                                                                      | S-adenosylmethionine synthase                                                     | gi 223635315 | 43152.7  | 5.55  | 16 | 394 | 100 | 284 | 100    |
|    | 2                                                                                                                                                                                                                                                                                                                                                                                                                                                      | Mechanosensitive ion channel [Triticum aestivum]                                  | gi 86439721  | 34712.9  | 8.46  | 8  | 30  | 0   |     |        |
|    | 3                                                                                                                                                                                                                                                                                                                                                                                                                                                      | Glutaryl tRNA reductase [Triticum aestivum]                                       | gi 354681872 | 57572    | 8.57  | 6  | 26  | 0   | 6   | 0      |
|    | 4                                                                                                                                                                                                                                                                                                                                                                                                                                                      | RAD51D protein [Triticum aestivum]                                                | gi 197092365 | 26608.1  | 9.48  | 6  | 25  | 0   |     |        |
|    | 5                                                                                                                                                                                                                                                                                                                                                                                                                                                      | Ribulose-1,5-bisphosphate carboxylase/oxygenase small                             | gi 11990893  | 19500.8  | 9.06  | 5  | 25  | 0   |     |        |
|    | 6                                                                                                                                                                                                                                                                                                                                                                                                                                                      | Pre-mRNA processing factor [Triticum aestivum], putative                          | gi 68035888  | 53987.6  | 9.67  | 8  | 24  | 0   |     |        |
|    | 7                                                                                                                                                                                                                                                                                                                                                                                                                                                      | MYB-related protein [Triticum aestivum]                                           | gi 359950770 | 66124    | 9.47  | 8  | 24  | 0   |     |        |
|    | 8                                                                                                                                                                                                                                                                                                                                                                                                                                                      | Ribulose-1,5-bisphosphate carboxylase/oxygenase small subunit [Triticum aestivum] | gi 11990897  | 19447.8  | 8.80  | 5  | 24  | 0   |     |        |
|    | 9                                                                                                                                                                                                                                                                                                                                                                                                                                                      | Acyl transferase 5 [Triticum aestivum], putative                                  | gi 151175359 | 46832.5  | 5.53  | 1  | 24  | 0   | 24  | 96.447 |
| 38 | 10                                                                                                                                                                                                                                                                                                                                                                                                                                                     | Thylakoid ascorbate peroxidase [Triticum aestivum]                                | gi 46095321  | 47948.3  | 7.57  | 5  | 24  | 0   | 10  | 0      |
|    | MAAVDTFLFTSESVNEGHPDKLCDQISDAVLDACLAEDPDSKVACETCTCTNMVMVFGEITTKANVDYKIVRDTCRGIGFVSNVDVGLDADHCKVLVNIEQQSPDIAQGVHGHFTKRPEEIGAGDQGHMFYGATDETPEFMPLSHVLATKLGARLLEVRKNATCPWLRPDGKTQVTVEYHNDNGAMVPIRVHTVLSTQHDVETVNDIEAADLKEHVIKVPIPEQYLDENTIFHLNPSGRFVIGGPHGDAGLTGRKIIIDTYGGWGAHGGGAFSGKDPTKVDRSGAYVARQAAKSIVASGIARRCIVQVSYAIGVPEPLSVFVDVTYGTGKIPDKLEIVKENFDFRPGMIIINLDLKRGGKGGRYLKTAAYGHFGREGADFTWEVVKPLKWEKPSA                                            |                                                                                   |              |          |       |    |     |     |     |        |
|    | 1                                                                                                                                                                                                                                                                                                                                                                                                                                                      | S-adenosylmethionine synthase                                                     | gi 223635315 | 43152.7  | 5.55  | 11 | 273 | 100 | 214 | 100    |
|    | 2                                                                                                                                                                                                                                                                                                                                                                                                                                                      | Ent-kaurene synthase [Triticum aestivum]                                          | gi 326367366 | 95062.1  | 6.40  | 11 | 31  | 0   |     |        |
|    | 3                                                                                                                                                                                                                                                                                                                                                                                                                                                      | Trehalose-6-P synthase [Triticum aestivum]                                        | gi 206600899 | 96698.6  | 5.97  | 6  | 29  | 0   | 20  | 88.125 |
|    | 4                                                                                                                                                                                                                                                                                                                                                                                                                                                      | Alcohol dehydrogenase ADH1A [Triticum aestivum]                                   | gi 119388723 | 40988.5  | 6.15  | 7  | 29  | 0   |     |        |
|    | 5                                                                                                                                                                                                                                                                                                                                                                                                                                                      | CBFIIIc-3.1 [Triticum aestivum]                                                   | gi 117653891 | 24876.1  | 4.86  | 4  | 28  | 0   | 9   | 0      |
|    | 6                                                                                                                                                                                                                                                                                                                                                                                                                                                      | Vacuolar ATPase subunit F [Triticum aestivum]                                     | gi 94537548  | 14370.5  | 5.33  | 4  | 28  | 0   |     |        |
|    | 7                                                                                                                                                                                                                                                                                                                                                                                                                                                      | Unnamed protein product [Triticum aestivum]                                       | gi 300681470 | 24476.1  | 6.77  | 6  | 25  | 0   |     |        |

|    |                                                                                                                                                                                                                                                                                                                                                                       |                                                                |              |         |       |    |     |     |     |        |
|----|-----------------------------------------------------------------------------------------------------------------------------------------------------------------------------------------------------------------------------------------------------------------------------------------------------------------------------------------------------------------------|----------------------------------------------------------------|--------------|---------|-------|----|-----|-----|-----|--------|
| 39 | 8                                                                                                                                                                                                                                                                                                                                                                     | MYB-related protein [Triticum aestivum]                        | gi 359950770 | 66124   | 9.47  | 8  | 24  | 0   |     |        |
|    | 9                                                                                                                                                                                                                                                                                                                                                                     | Powdery mildew resistance protein PM [Triticum aestivum]       | gi 62511923  | 75144.9 | 7.62  | 7  | 24  | 0   | 9   | 0      |
|    | 10                                                                                                                                                                                                                                                                                                                                                                    | Alcohol dehydrogenase ADH1D [Triticum aestivum]                | gi 119388725 | 40989.5 | 6.03  | 6  | 22  | 0   |     |        |
|    | MGSIAAGADEDACMYALQLVSSSILPMTLKNAIELGLETLMAAGGKFLTPAEVAAKLP5AANPEAPDMVDRMLRLLASYNVVSCTEEGKDGRLSRRYGAAPVCKYLTPTNEDGVSM5SALALMNQDKVLMESWYYLKDAVLDGGIPFNKAYGMSAFEHYHGTDPFRFNRFNEGMKNHSIIITKLLLESYKGFEGLGLTVDVGGVGATVAITAHYPTIKGINFDLPHVISEAPPFPGVTHVGGDMFQKVPSADAILMKWILHDWSDHEHCATLLKNCYDALPAHGKVVVLVECILPVNPEATPKAQGVFHVDMIMLAHNPGGRERYEREFEALAKGAGFAAMKTTYIYANAWAIEFTK |                                                                |              |         |       |    |     |     |     |        |
|    | 1                                                                                                                                                                                                                                                                                                                                                                     | Flavone O-methyltransferase 1/Caffeic acid O-methyltransferase | gi 75147302  | 38834.6 | 5.75  | 15 | 732 | 100 | 615 | 100    |
|    | 2                                                                                                                                                                                                                                                                                                                                                                     | Caffeic acid 3-O-methyltransferase [Triticum aestivum]         | gi 145321007 | 38573.4 | 5.71  | 12 | 442 | 100 | 364 | 100    |
|    | 3                                                                                                                                                                                                                                                                                                                                                                     | Caffeic acid O-methyltransferase [Triticum aestivum]           | gi 33323468  | 22028   | 6.04  | 7  | 218 | 100 | 174 | 100    |
|    | 4                                                                                                                                                                                                                                                                                                                                                                     | O-methyltransferase 4 [Triticum aestivum]                      | gi 145693798 | 38430.3 | 5.60  | 8  | 212 | 100 | 174 | 100    |
|    | 5                                                                                                                                                                                                                                                                                                                                                                     | O-methyltransferase 5 [Triticum aestivum]                      | gi 145693796 | 38983.6 | 5.37  | 4  | 108 | 100 | 96  | 100    |
|    | 6                                                                                                                                                                                                                                                                                                                                                                     | Small heat shock protein Hsp23.6 [Triticum aestivum]           | gi 4138871   | 23622   | 5.25  | 5  | 25  | 0   |     |        |
| 40 | 7                                                                                                                                                                                                                                                                                                                                                                     | Ribulose-1,5-bisphosphate carboxylase/oxygenase small          | gi 11990893  | 19500.8 | 9.06  | 5  | 24  | 0   |     |        |
|    | 8                                                                                                                                                                                                                                                                                                                                                                     | Ribulose bisphosphate carboxylase                              | gi 132107    | 13046.5 | 5.84  | 4  | 24  | 0   |     |        |
|    | 9                                                                                                                                                                                                                                                                                                                                                                     | Cytochrome b6-f complex iron-sulfur subunit, chloroplastic     | gi 68566191  | 23711   | 8.47  | 5  | 23  | 0   |     |        |
|    | 10                                                                                                                                                                                                                                                                                                                                                                    | MADS-box transcription factor TaAGL26 [Triticum aestivum]      | gi 95981884  | 24101.4 | 7.81  | 5  | 22  | 0   |     |        |
|    | MGSIAAGADEDACMYALQLVSSSILPMTLKNAIELGLETLMAAGGKFLTPAEVAAKLP5AANPEAPDMVDRMLRLLASYNVVSCTEEGKDGRLSRRYGAAPVCKYLTPTNEDGVSM5SALALMNQDKVLMESWYYLKDAVLDGGIPFNKAYGMSAFEHYHGTDPFRFNRFNEGMKNHSIIITKLLLESYKGFEGLGLTVDVGGVGATVAITAHYPTIKGINFDLPHVISEAPPFPGVTHVGGDMFQKVPSADAILMKWILHDWSDHEHCATLLKNCYDALPAHGKVVVLVECILPVNPEATPKAQGVFHVDMIMLAHNPGGRERYEREFEALAKGAGFAAMKTTYIYANAWAIEFTK |                                                                |              |         |       |    |     |     |     |        |
|    | 1                                                                                                                                                                                                                                                                                                                                                                     | Flavone O-methyltransferase 1/Caffeic acid O-methyltransferase | gi 75147302  | 38834.6 | 5.75  | 18 | 711 | 100 | 556 | 100    |
|    | 2                                                                                                                                                                                                                                                                                                                                                                     | Caffeic acid 3-O-methyltransferase [Triticum aestivum]         | gi 145321007 | 38573.4 | 5.71  | 14 | 508 | 100 | 409 | 100    |
|    | 3                                                                                                                                                                                                                                                                                                                                                                     | O-methyltransferase 4 [Triticum aestivum]                      | gi 145693798 | 38430.3 | 5.60  | 9  | 258 | 100 | 212 | 100    |
|    | 4                                                                                                                                                                                                                                                                                                                                                                     | Caffeic acid O-methyltransferase [Triticum aestivum]           | gi 33323468  | 22028   | 6.04  | 7  | 256 | 100 | 212 | 100    |
|    | 5                                                                                                                                                                                                                                                                                                                                                                     | O-methyltransferase 5 [Triticum aestivum]                      | gi 145693796 | 38983.6 | 5.37  | 6  | 152 | 100 | 130 | 100    |
| 41 | 6                                                                                                                                                                                                                                                                                                                                                                     | Glutathione synthetase [Triticum aestivum]                     | gi 33352235  | 52738.9 | 5.35  | 2  | 27  | 0   | 27  | 97.831 |
|    | 7                                                                                                                                                                                                                                                                                                                                                                     | Ribulose-1,5-bisphosphate carboxylase/oxygenase small          | gi 11990893  | 19500.8 | 9.06  | 5  | 24  | 0   |     |        |
|    | 8                                                                                                                                                                                                                                                                                                                                                                     | Ribulose bisphosphate carboxylase                              | gi 132107    | 13046.5 | 5.84  | 4  | 24  | 0   |     |        |
|    | 9                                                                                                                                                                                                                                                                                                                                                                     | MADS-box transcription factor TaAGL26 [Triticum                | gi 95981884  | 24101.4 | 7.81  | 5  | 22  | 0   |     |        |
|    | 10                                                                                                                                                                                                                                                                                                                                                                    | Ribulosebisphosphate carboxylase [Triticum aestivum]           | gi 755804    | 18119.9 | 8.95  | 4  | 22  | 0   |     |        |
|    | MAGKRELVISFGEMLIDFVPTVAGVSLAEAPAFVKAPGGAPANVAIAVARLGGAAAFVGKLGDDDEFGRMLAGILRDNGVDASAVVFD5SGARTALAFVTLRADGEREFMFYRNPSADMLLTAELNVELIKKAAPFHYGSISLIAEPCRTAHLRAMEIAKGAGALLSYDPNLREALWPSRDEARTKILSIWDQADIVKVSEVELEFLTGIDSVEDNVVMKLRWPTFKLLVTLGDQGGKYYTKDFRGVVP5SYKQQVDTTGAGDAFVGALLRKRIVHDPSSLQDQKKLVEAIKFANACGAITATKKGAIPSLPTEVEVRLIEKA                                   |                                                                |              |         |       |    |     |     |     |        |
|    | 1                                                                                                                                                                                                                                                                                                                                                                     | Predicted protein [Hordeum vulgare subsp. vulgare]             | gi 326489677 | 34762.2 | 5.67  | 12 | 498 | 100 | 426 | 100    |
|    | 2                                                                                                                                                                                                                                                                                                                                                                     | Os01g0894300 [Oryza sativa Japonica Group]                     | gi 297598102 | 34698   | 5.07  | 9  | 294 | 100 | 248 | 100    |
|    | 3                                                                                                                                                                                                                                                                                                                                                                     | Fructokinase-1                                                 | gi 158512869 | 34707   | 5.14  | 8  | 286 | 100 | 248 | 100    |
|    | 4                                                                                                                                                                                                                                                                                                                                                                     | Fructokinase-1 [Zea mays]                                      | gi 195650763 | 34582   | 5.13  | 7  | 279 | 100 | 248 | 100    |
| 42 | 5                                                                                                                                                                                                                                                                                                                                                                     | Fructokinase [Oryza sativa Japonica Group], putative           | gi 57899806  | 27182.1 | 5.17  | 6  | 247 | 100 | 221 | 100    |
|    | 6                                                                                                                                                                                                                                                                                                                                                                     | Hypothetical protein Osl_04762 [Oryza sativa Indica Group]     | gi 218189518 | 27191.1 | 5.27  | 5  | 240 | 100 | 221 | 100    |
|    | 7                                                                                                                                                                                                                                                                                                                                                                     | Fructokinase-1-like [Brachypodium distachyon], predicted       | gi 357126300 | 34650.3 | 5.79  | 8  | 211 | 100 | 174 | 100    |
|    | 8                                                                                                                                                                                                                                                                                                                                                                     | Predicted protein [Hordeum vulgare subsp. vulgare]             | gi 326518162 | 34594.8 | 4.76  | 7  | 204 | 100 | 174 | 100    |
|    | 9                                                                                                                                                                                                                                                                                                                                                                     | Predicted protein [Hordeum vulgare subsp. vulgare]             | gi 326494746 | 38124.6 | 5.66  | 9  | 143 | 100 | 101 | 100    |
|    | 10                                                                                                                                                                                                                                                                                                                                                                    | Fructokinase-2 [Vitis vinifera], predicted                     | gi 225433918 | 35177.2 | 5.13  | 8  | 111 | 100 | 74  | 99.984 |
|    | MAIKRTKAEEKKVAYDKKLQQLLDEYTKVLIADVNVGSNQLQEIRKGLRGDSIVLMGKNTLIRRCIKVHADNTGNKEFLELMPLLVGNVGLIFTKGDLKEVREEVAKYKVGAPARVGLVAPVDVVPPGNTGLDPSQTSFFQV5LNIPTKINKGTVEIITPVELIKKGDKVGSSEALLAKLGRPF5SYGLVITNVYDSGSVFSPEVLDLTEDDLMEKFASGVSMVASVSLAISYPTIAAAPHMFLNGYKNVLAVAVETEYSYPHADKIKEYLKDPSKFAVAAPVAADSGA5AAPSAAKEEEKKEEPEESDGLGMSLFD                                         |                                                                |              |         |       |    |     |     |     |        |
|    | 1                                                                                                                                                                                                                                                                                                                                                                     | Os08g0130500 [Oryza sativa Japonica Group]                     | gi 115474653 | 34356.1 | 5.38  | 3  | 92  | 100 | 81  | 100    |
|    | 2                                                                                                                                                                                                                                                                                                                                                                     | MYB-related protein [Triticum aestivum]                        | gi 359952782 | 48051.4 | 8.93  | 8  | 33  | 0   |     |        |
|    | 3                                                                                                                                                                                                                                                                                                                                                                     | Absciseic acid-induced protein [Triticum aestivum]             | gi 32400834  | 10950.2 | 11.74 | 5  | 32  | 0   |     |        |
|    | 4                                                                                                                                                                                                                                                                                                                                                                     | Annexin [Triticum aestivum]                                    | gi 38606205  | 35416.1 | 9.01  | 8  | 32  | 0   |     |        |

|    |                                                                                                                                                                                                                                                                                                                                                                                                            |                                                                     |              |          |       |    |     |        |     |        |
|----|------------------------------------------------------------------------------------------------------------------------------------------------------------------------------------------------------------------------------------------------------------------------------------------------------------------------------------------------------------------------------------------------------------|---------------------------------------------------------------------|--------------|----------|-------|----|-----|--------|-----|--------|
|    | 5                                                                                                                                                                                                                                                                                                                                                                                                          | Polyprotein [Triticum aestivum], putative                           | gi 217426769 | 28749.3  | 5.29  | 7  | 30  | 0      |     |        |
|    | 6                                                                                                                                                                                                                                                                                                                                                                                                          | Ribulose-1,5-bisphosphate carboxylase/oxygenase small               | gi 4038673   | 18533.4  | 8.83  | 5  | 27  | 0      |     |        |
|    | 7                                                                                                                                                                                                                                                                                                                                                                                                          | P450 [Triticum aestivum]                                            | gi 48762803  | 59137.5  | 6.41  | 8  | 26  | 0      |     |        |
|    | 8                                                                                                                                                                                                                                                                                                                                                                                                          | P450 [Triticum aestivum]                                            | gi 48526685  | 59236.6  | 6.50  | 8  | 26  | 0      |     |        |
|    | 9                                                                                                                                                                                                                                                                                                                                                                                                          | P450 [Triticum aestivum]                                            | gi 62148970  | 59289.7  | 6.61  | 8  | 25  | 0      |     |        |
|    | 10                                                                                                                                                                                                                                                                                                                                                                                                         | cytochrome P450 [Triticum aestivum]                                 | gi 26655528  | 59519.8  | 6.75  | 8  | 25  | 0      |     |        |
|    | MASRMLRPHAVTPRLAAGRGRNGSVRLVAVASCASAKIDSKTFAPPKQVHVQVTHSMPPQKMDIFQSLYWARDNLKHLKPVKECWQPQDFLPDPPSDGFHDEVKELRERAKENPDDYLVCLFGDMITEALPTYQ<br>TMLNTLDGVRDETGAASPTAWAVWTRAUTAEENRHGDLLNKYLYLTGRVDMRQIEKTIQYLGSGMDPRTEENNPYLGFYTSFQERATFISHGNTARHAKDFGDLKLAQICGIIASDEKRHETAYTKIVEKLFEIDPDGTVLALAD<br>MMRKKIAMPAPHLMFDGQDEKLFDFHSMVAQRLGVYTARDYADILEFLVGRWKVPELTGLSGEGHKAQDYLCITLAGRIRKLDERAQSRQAGKMPFSWVYGVREVQM |                                                                     |              |          |       |    |     |        |     |        |
|    | 1                                                                                                                                                                                                                                                                                                                                                                                                          | Stearoyl-ACP desaturase [Triticum aestivum]                         | gi 319739540 | 44426.4  | 8.15  | 14 | 228 | 100    | 155 | 100    |
|    | 2                                                                                                                                                                                                                                                                                                                                                                                                          | ADP-glucose pyrophosphorylase small subunit, plastid                | gi 224021585 | 56253.8  | 6.40  | 9  | 30  | 0      |     |        |
|    | 3                                                                                                                                                                                                                                                                                                                                                                                                          | Puroindoline a [Triticum aestivum]                                  | gi 149212447 | 16366    | 8.72  | 6  | 30  | 0      |     |        |
| 43 | 4                                                                                                                                                                                                                                                                                                                                                                                                          | Ribulose-bisphosphate carboxylase (EC 4.1.1.39) small               | gi 82619     | 15344.9  | 8.95  | 5  | 30  | 0      |     |        |
|    | 5                                                                                                                                                                                                                                                                                                                                                                                                          | WAL17 [Triticum aestivum]                                           | gi 257135793 | 28053.7  | 6.99  | 6  | 28  | 0      |     |        |
|    | 6                                                                                                                                                                                                                                                                                                                                                                                                          | SUSIBA2-like protein [Triticum aestivum]                            | gi 34329333  | 22543.2  | 7.16  | 5  | 24  | 0      |     |        |
|    | 7                                                                                                                                                                                                                                                                                                                                                                                                          | Puroindoline=basic cystine-rich protein [Triticum                   | gi 408873    | 12920.2  | 8.76  | 5  | 24  | 0      |     |        |
|    | 8                                                                                                                                                                                                                                                                                                                                                                                                          | 14-3-3 protein [Triticum aestivum]                                  | gi 40781605  | 29273.7  | 4.83  | 6  | 24  | 0      |     |        |
|    | 9                                                                                                                                                                                                                                                                                                                                                                                                          | WRKY45-like transcription factor [Triticum aestivum]                | gi 341864987 | 31615.3  | 5.92  | 6  | 23  | 0      |     |        |
|    | 10                                                                                                                                                                                                                                                                                                                                                                                                         | Protein kinase [Triticum aestivum]                                  | gi 110341803 | 61660.4  | 9.12  | 9  | 23  | 0      |     |        |
|    | MADAATIAKLEEGFKKLEAATDCKSLKKYLTKDIFDSLKAKKTGLGATLLDVIQSGVENLDSGVGIYAPDAEAYSIFAPLFDPIIEDYHKGFKQTDKHAKDFGDVSKFINVDPEGTFVISTRVRCGRSMEGYFPNPCLTEAQY<br>KEMEEKVSSTLSGLELGKSYFPLTGMTKEVQQLIDHFLFKEGDRFLQAANACRYWPAGRGYIHNDNKFTLVWCNEEDHLRIISMQMGDDLQGVYRRLVSAVNDIEKRVPFSSHDLRGFLTFCPTNLGTTVRASVHIKLP<br>KLAANREKLEEVAAKFSLQVRGTRGEHTEAEGGIYDISNKRRLMGLTEFQAVKEMQDGILELIKIEKEM                                    |                                                                     |              |          |       |    |     |        |     |        |
|    | 1                                                                                                                                                                                                                                                                                                                                                                                                          | Uncharacterized protein LOC100273160 [Zea mays]                     | gi 226528643 | 39942.3  | 6.05  | 10 | 103 | 99.995 | 50  | 94.629 |
|    | 2                                                                                                                                                                                                                                                                                                                                                                                                          | Predicted protein [Physcomitrella patens subsp. patens]             | gi 168042645 | 12933.5  | 6.97  | 6  | 56  | 0      |     |        |
|    | 3                                                                                                                                                                                                                                                                                                                                                                                                          | Maturase K [Tachigali sp. Clarke 7212]                              | gi 183529279 | 59810.3  | 9.33  | 13 | 53  | 0      |     |        |
| 44 | 4                                                                                                                                                                                                                                                                                                                                                                                                          | Predicted protein [Physcomitrella patens subsp. patens]             | gi 168003694 | 13992    | 6.20  | 6  | 52  | 0      |     |        |
|    | 5                                                                                                                                                                                                                                                                                                                                                                                                          | Exportin-1-like isoform 2 [Glycine max], predicted                  | gi 356543440 | 122123.4 | 5.35  | 17 | 50  | 0      |     |        |
|    | 6                                                                                                                                                                                                                                                                                                                                                                                                          | Exportin-1-like isoform 3 [Glycine max], predicted                  | gi 356543442 | 122492.5 | 5.29  | 17 | 50  | 0      |     |        |
|    | 7                                                                                                                                                                                                                                                                                                                                                                                                          | Predicted protein [Populus trichocarpa]                             | gi 224144521 | 18696.2  | 6.89  | 8  | 50  | 0      |     |        |
|    | 8                                                                                                                                                                                                                                                                                                                                                                                                          | Hypothetical protein Osl_27441 [Oryza sativa Indica                 | gi 218200310 | 67755.7  | 9.85  | 13 | 50  | 0      |     |        |
|    | 9                                                                                                                                                                                                                                                                                                                                                                                                          | Predicted protein [Chlamydomonas reinhardtii]                       | gi 159465393 | 56157.3  | 11.93 | 12 | 49  | 0      |     |        |
|    | 10                                                                                                                                                                                                                                                                                                                                                                                                         | Predicted protein [Populus trichocarpa]                             | gi 224079477 | 11660.8  | 9.05  | 7  | 49  | 0      |     |        |
|    | MRSSLLRSASQHLRRRGYASAAAGQPERKVAILGAAGGIGQPLALLMKNLNPVSSLSLYDIAATPGVAADVSHINSALVKGFVGDDQLGEALEGADLVIIIPAGVPRKPGMTRDDLKFINAGIVKGLCTAISKYCPNALVNMISNP<br>VNSTVPAAEVFKKAGTYDEKKLFGVTTLDVVRAKTFYAGKANVPVTGVNVPVVGHGAGITILPLFSQATPSSNALSHEDLKALTKRTQDGGTEVVEAKAGKGSATLSMAYAGAVFGDACLKGLNGVPDIIIECSFVQSTVTDL<br>PFFASKVRLGKNGVEEVIGLGELSAFEKEGLESLKGELMSSIEKGKFAQEN                                               |                                                                     |              |          |       |    |     |        |     |        |
|    | 1                                                                                                                                                                                                                                                                                                                                                                                                          | Predicted protein [Hordeum vulgare subsp. vulgare]                  | gi 326493440 | 35844.9  | 8.20  | 8  | 593 | 100    | 558 | 100    |
|    | 2                                                                                                                                                                                                                                                                                                                                                                                                          | Malate dehydrogenase 1,mitochondrial-like [Brachypodium distachyon] | gi 357132456 | 35371.7  | 8.54  | 6  | 364 | 100    | 342 | 100    |
|    | 3                                                                                                                                                                                                                                                                                                                                                                                                          | Malate dehydrogenase [Micromonas sp. RCC299]                        | gi 255073915 | 33424.3  | 4.95  | 7  | 133 | 100    | 104 | 100    |
| 45 | 4                                                                                                                                                                                                                                                                                                                                                                                                          | Os05g0574400 [Oryza sativa Japonica Group]                          | gi 115465579 | 35413.7  | 8.22  | 7  | 133 | 100    | 104 | 100    |
|    | 5                                                                                                                                                                                                                                                                                                                                                                                                          | Predicted protein [Populus trichocarpa]                             | gi 224116458 | 22240.8  | 9.10  | 5  | 127 | 100    | 104 | 100    |
|    | 6                                                                                                                                                                                                                                                                                                                                                                                                          | Malate dehydrogenase, mitochondrial;                                | gi 126896    | 36178.2  | 8.88  | 6  | 125 | 100    | 104 | 100    |
|    | 7                                                                                                                                                                                                                                                                                                                                                                                                          | Malate dehydrogenase [Pinus pinaster]                               | gi 332591472 | 36954.4  | 8.90  | 6  | 125 | 100    | 104 | 100    |
|    | 8                                                                                                                                                                                                                                                                                                                                                                                                          | Malate dehydrogenase, putative [Ricinus communis]                   | gi 255563084 | 35850.8  | 8.47  | 6  | 125 | 100    | 104 | 100    |
|    | 9                                                                                                                                                                                                                                                                                                                                                                                                          | Hypothetical protein SORBIDRAFT_03g029570                           | gi 242053811 | 35613.8  | 7.63  | 6  | 125 | 100    | 104 | 100    |
|    | 10                                                                                                                                                                                                                                                                                                                                                                                                         | Os01g0649100 [Oryza sativa Japonica Group]                          | gi 115438875 | 35438.6  | 8.74  | 6  | 124 | 100    | 104 | 100    |
|    | LLHRAFSVFLFNSKPELLLQORSATKVTFPLVWNTNCCSHPLYRESELIQENFLGVRNAAQRKLLDELGIPAEDVPVDQFTPLGRMLYKAPSDGKWEHELDYLLFIVRDVKLPNPDEVADVKYVSREQLRELIQQADAGEGG<br>VKLSWPVRLVVDNFMGMWWEHLEKGTAEAVDMETHKIKL                                                                                                                                                                                                                  |                                                                     |              |          |       |    |     |        |     |        |
|    | 1                                                                                                                                                                                                                                                                                                                                                                                                          | Isopentenyl pyrophosphate isomerase [Triticum aestivum]             | gi 193072753 | 21147    | 5.41  | 8  | 283 | 100    | 226 | 100    |
|    | 2                                                                                                                                                                                                                                                                                                                                                                                                          | Histone deacetylase [Triticum aestivum]                             | gi 52548252  | 50933.8  | 5.31  | 8  | 30  | 0      |     |        |



|    |                                                                                                                                                                                                                                                                                                                               |                                                                                        |              |          |      |    |     |        |     |     |
|----|-------------------------------------------------------------------------------------------------------------------------------------------------------------------------------------------------------------------------------------------------------------------------------------------------------------------------------|----------------------------------------------------------------------------------------|--------------|----------|------|----|-----|--------|-----|-----|
| 46 | 3                                                                                                                                                                                                                                                                                                                             | UDP-glucuronosyl/UDP-glucosyl transferase protein                                      | gi 171674071 | 54844.2  | 5.12 | 9  | 29  | 0      |     |     |
|    | 4                                                                                                                                                                                                                                                                                                                             | Serine/threonine protein kinase Stpk-A [Triticum                                       | gi 333384999 | 44613.9  | 7.63 | 7  | 27  | 0      |     |     |
|    | 5                                                                                                                                                                                                                                                                                                                             | Alcohol dehydrogenase ADH3-1 [Triticum aestivum]                                       | gi 119388711 | 40982.6  | 5.91 | 7  | 27  | 0      |     |     |
|    | 6                                                                                                                                                                                                                                                                                                                             | Glycosyltransferase, HGA-like, putative, expressed                                     | gi 300681530 | 68832    | 6.38 | 9  | 27  | 0      |     |     |
|    | 7                                                                                                                                                                                                                                                                                                                             | Ornithine carbamoyl transferase [Triticum aestivum]                                    | gi 318086913 | 3072.4   | 4.57 | 3  | 26  | 0      |     |     |
|    | 8                                                                                                                                                                                                                                                                                                                             | Cold acclimation protein WCOR615 [Triticum aestivum]                                   | gi 1657857   | 17773.5  | 4.92 | 5  | 24  | 0      |     |     |
|    | 9                                                                                                                                                                                                                                                                                                                             | Tsn1 [Triticum durum]                                                                  | gi 296033920 | 168126.7 | 6.62 | 14 | 24  | 0      |     |     |
|    | 10                                                                                                                                                                                                                                                                                                                            | Ribulose biphosphate carboxylase small chain clone 512                                 | gi 132107    | 13046.5  | 5.84 | 4  | 24  | 0      |     |     |
|    | MADEYGRSGAYGRSGTDDYETGYKKSGTDDYDGSAGAGGYNKSAGDDEYSGGAGYKKSGAGADDYDGGYKSTHEDYGRNKSATDDYDRSGAGGYKKSSGDDDEYSGGGYKKSGGDDEYKSTGDDDEYSGGGYKKSTPGGDDDESDKYRKEEKEHKRKEHLGEMGTLAAGAFAMYEHQAQKDPENAHHRHKIEEEVAAVAAGVSGGYAFHEHHEKKESREDAEEDDEESGRGEGKKKHFFFG                                                                             |                                                                                        |              |          |      |    |     |        |     |     |
|    | 1                                                                                                                                                                                                                                                                                                                             | Uncharacterized protein LOC100822602 [Brachypodium distachyon], predicted              | gi 357163453 | 25950.6  | 5.11 | 4  | 231 | 100    | 215 | 100 |
| 47 | 2                                                                                                                                                                                                                                                                                                                             | Abscisic stress ripening [Musa acuminata AAA Group]                                    | gi 269852824 | 16707.8  | 5.70 | 2  | 125 | 100    | 116 | 100 |
|    | 3                                                                                                                                                                                                                                                                                                                             | Hypothetical protein SELMODRAFT_138488                                                 | gi 302825464 | 29513.5  | 8.66 | 10 | 60  | 5.754  |     |     |
|    | 4                                                                                                                                                                                                                                                                                                                             | Hypothetical protein SELMODRAFT_428029 [Selaginella moellendorffii]                    | gi 302815458 | 40823.6  | 6.49 | 9  | 53  | 0      |     |     |
|    | 5                                                                                                                                                                                                                                                                                                                             | OSJNBb0034113.10 [Oryza sativa Japonica Group]                                         | gi 21741247  | 157623.3 | 8.59 | 20 | 52  | 0      |     |     |
|    | 6                                                                                                                                                                                                                                                                                                                             | NAD(P)H-dependent, probably, predicted                                                 | gi 225424504 | 35573.4  | 5.66 | 10 | 51  | 0      |     |     |
|    | 7                                                                                                                                                                                                                                                                                                                             | Uncharacterized protein LOC100855072 [Vitis vinifera], predicted                       | gi 359473529 | 100172.1 | 6.03 | 16 | 49  | 0      |     |     |
|    | 8                                                                                                                                                                                                                                                                                                                             | Hypothetical protein ARALYDRAFT_895672 [Arabidopsis lyrata subsp. lyrata]              | gi 297842563 | 12568.4  | 8.46 | 8  | 49  | 0      |     |     |
|    | 9                                                                                                                                                                                                                                                                                                                             | Transposon protein, putative, CACTA, En/Spm sub-class [Oryza sativa Japonica Group]    | gi 77551246  | 75968.9  | 8.64 | 15 | 48  | 0      |     |     |
|    | 10                                                                                                                                                                                                                                                                                                                            | Unknown [Zea mays]                                                                     | gi 238007756 | 47104.8  | 7.78 | 11 | 47  | 0      |     |     |
|    | MAPKDRILVLGPTGAIGRHIVWASVKAGNPTFILVRDTPASVKNPRLVTAANPETREELIQSFQNSGVTLIQGDMNDHESLVNAIKQVDVVICSFGRLLIEDQVKIVAAIKEAGNVKRRFFPSEFGLDVDRHDAAPVREVFEKAKIRRVIEAEGIPYTYLCCHAFTGYFLRNLAQIDITVPPRDKVFIQGDGNVKGAYITEADVGTFTIEAANDPRALNKAHVHRLPNNYLSLNDIISLWEKKIGKLTLEKIYVSEEVVKQIKETSFLNNYLLALYHSQQIKGDAVYEIDPAKDLAESEAYPHVEYSTVSEYLDQFV |                                                                                        |              |          |      |    |     |        |     |     |
| 48 | 1                                                                                                                                                                                                                                                                                                                             | Hypothetical protein SORBIDRAFT_03g008760 [Sorghum bicolor]                            | gi 242052385 | 33034.5  | 5.38 | 6  | 280 | 100    | 256 | 100 |
|    | 2                                                                                                                                                                                                                                                                                                                             | Hypothetical protein SORBIDRAFT_03g029820 [Sorghum bicolor]                            | gi 242058197 | 30399.9  | 5.53 | 5  | 195 | 100    | 176 | 100 |
|    | 3                                                                                                                                                                                                                                                                                                                             | Unknown [Glycine max]                                                                  | gi 255648230 | 35643.7  | 5.51 | 6  | 119 | 100    | 97  | 100 |
|    | 4                                                                                                                                                                                                                                                                                                                             | NADPH:isoflavone reductase [Glycine max]                                               | gi 351724529 | 35568.5  | 5.30 | 6  | 119 | 100    | 97  | 100 |
|    | 5                                                                                                                                                                                                                                                                                                                             | Isoflavone reductase homolog [Lotus japonicus]                                         | gi 116077992 | 35360.7  | 5.69 | 6  | 119 | 100    | 97  | 100 |
|    | 6                                                                                                                                                                                                                                                                                                                             | Isoflavone reductase-like protein [Picea sitchensis]                                   | gi 306018397 | 30818.9  | 7.05 | 2  | 117 | 100    | 111 | 100 |
|    | 7                                                                                                                                                                                                                                                                                                                             | Unknown [Picea sitchensis]                                                             | gi 148909885 | 16875.5  | 5.12 | 1  | 115 | 100    | 111 | 100 |
|    | 8                                                                                                                                                                                                                                                                                                                             | Isoflavone reductase homolog IRL [Zea mays]                                            | gi 162461348 | 32831.4  | 5.69 | 5  | 114 | 100    | 97  | 100 |
|    | 9                                                                                                                                                                                                                                                                                                                             | Isoflavone reductase-like [Glycine max], predicted                                     | gi 356538212 | 35549.7  | 5.51 | 5  | 113 | 100    | 97  | 100 |
|    | 10                                                                                                                                                                                                                                                                                                                            | Isoflavone reductase/2'-hydroxyisoflavone reductase/isoflavone oxidoreductase          | gi 1708425   | 35386.5  | 5.94 | 5  | 113 | 100    | 97  | 100 |
| 49 | MDRTSQWVSSPDIPADLLIRIADDVFPLLKGVMPKCGYIRKAVAAAARGGATATVDLDSLALPGGADAFDKAARYCYGANFEISVRNAAALLCAAFLDMHPTDGGGLARRVEEFLAKVGLRRTLPGAVAVLRYCEGLLPAAEEIGVVQRSADAIALRICNEVLPFTRSPPEWWTAELAALSPASFHKVITLARSELARMRAYVSGMQQSKGSSSSRGKKGSWLRRLSRLNPFKAGIWGKDTSGIVDGTKTDAMNSVKSRRRFSIS                                                     |                                                                                        |              |          |      |    |     |        |     |     |
|    | 1                                                                                                                                                                                                                                                                                                                             | Root phototropism 2 [Oryza sativa Japonica Group], putative, expressed                 | gi 108862102 | 28468.9  | 9.65 | 10 | 70  | 89.179 | 13  | 0   |
|    | 2                                                                                                                                                                                                                                                                                                                             | Unknown [Picea sitchensis]                                                             | gi 148907206 | 39010.3  | 6.65 | 11 | 58  | 0      |     |     |
|    | 3                                                                                                                                                                                                                                                                                                                             | Root phototropism 2 [Oryza sativa Japonica Group], putative, expressed                 | gi 77552853  | 60503.3  | 8.66 | 12 | 57  | 0      | 13  | 0   |
|    | 4                                                                                                                                                                                                                                                                                                                             | Osl2g0117400 [Oryza sativa Japonica Group]                                             | gi 115487026 | 62362.2  | 8.55 | 12 | 57  | 0      | 13  | 0   |
|    | 5                                                                                                                                                                                                                                                                                                                             | Osl1g0118300 [Oryza sativa Japonica Group]                                             | gi 115483869 | 60493.2  | 8.40 | 12 | 57  | 0      | 13  | 0   |
|    | 6                                                                                                                                                                                                                                                                                                                             | Cysteine-rich receptor-like protein kinase 29-like [Vitis vinifera], predicted         | gi 225452063 | 72932.5  | 5.65 | 14 | 56  | 0      |     |     |
|    | 7                                                                                                                                                                                                                                                                                                                             | Ring finger protein [Ricinus communis], putative                                       | gi 255583204 | 39517.7  | 6.83 | 11 | 54  | 0      |     |     |
|    | 8                                                                                                                                                                                                                                                                                                                             | Hypothetical protein MTR_1g005870 [Medicago truncatula]                                | gi 357436077 | 20917.8  | 8.91 | 9  | 52  | 0      |     |     |
|    | 9                                                                                                                                                                                                                                                                                                                             | Hypothetical protein VITISV_026923 [Vitis vinifera]                                    | gi 147791345 | 69798    | 6.17 | 14 | 52  | 0      |     |     |
|    | 10                                                                                                                                                                                                                                                                                                                            | Hypothetical protein Osl_34888 [Oryza sativa Indica Group]                             | gi 218185128 | 60482.2  | 8.25 | 11 | 51  | 0      | 13  | 0   |
|    | MEDINNGFKAATAAAAGVPAADKYKTFEATFSAASNKAFAEVLKGAATGQYAAQSSMAKLSSSLELSYKLAYDKAQGATPETKYDAYVATLTESLRVISGTLVHSHVKAPEEEVKGVPTGELKAIDQVDAAFRTAATAADAA                                                                                                                                                                                |                                                                                        |              |          |      |    |     |        |     |     |
|    | PVNDKFTVFESSFNKAIKETTTGGTYESYKFIPALEAAVQYAAATVAAPEVKFTVFQFALSAINAMTQAEKDAKAPAAAATATATPGASAGATAGGYKA                                                                                                                                                                                                                           |                                                                                        |              |          |      |    |     |        |     |     |
|    | 1                                                                                                                                                                                                                                                                                                                             | Group 5/9 grass pollen allergen R8-5 [Triticum turgidum subsp. durum x Secale cereale] | gi 365769201 | 24910.6  | 5.61 | 7  | 199 | 100    | 164 | 100 |
|    | 2                                                                                                                                                                                                                                                                                                                             | 30 kDa pollen allergen [Hordeum vulgare]                                               | gi 459163    | 18359.6  | 8.68 | 4  | 182 | 100    | 164 | 100 |

|    |                                                                                                                                                                                                                                                                                                                                                                                                                                                                                                                          |                                                                                                      |              |          |      |    |     |        |     |        |
|----|--------------------------------------------------------------------------------------------------------------------------------------------------------------------------------------------------------------------------------------------------------------------------------------------------------------------------------------------------------------------------------------------------------------------------------------------------------------------------------------------------------------------------|------------------------------------------------------------------------------------------------------|--------------|----------|------|----|-----|--------|-----|--------|
| 50 | 3                                                                                                                                                                                                                                                                                                                                                                                                                                                                                                                        | Pollen allergen precursor [Hordeum vulgare]                                                          | gi 1808987   | 33127.1  | 9.43 | 4  | 176 | 100    | 164 | 100    |
|    | 4                                                                                                                                                                                                                                                                                                                                                                                                                                                                                                                        | Predicted protein [Hordeum vulgare subsp. vulgare]                                                   | gi 326527679 | 30064.4  | 6.62 | 4  | 174 | 100    | 161 | 100    |
|    | 5                                                                                                                                                                                                                                                                                                                                                                                                                                                                                                                        | Predicted protein [Hordeum vulgare subsp. vulgare]                                                   | gi 326534176 | 35730.8  | 6.40 | 7  | 140 | 100    | 116 | 100    |
|    | 6                                                                                                                                                                                                                                                                                                                                                                                                                                                                                                                        | Uncharacterized protein LOC100830071 [Brachypodium distachyon], predicted                            | gi 357164825 | 36973.4  | 8.44 | 3  | 123 | 100    | 116 | 100    |
|    | 7                                                                                                                                                                                                                                                                                                                                                                                                                                                                                                                        | Uncharacterized protein LOC100382145 [Zea mays]                                                      | gi 293335391 | 37298.5  | 6.49 | 4  | 123 | 100    | 112 | 100    |
|    | 8                                                                                                                                                                                                                                                                                                                                                                                                                                                                                                                        | Hypothetical protein SORBIDRAFT_06g023220 [Sorghum bicolor]                                          | gi 242073772 | 37152.5  | 6.56 | 4  | 122 | 100    | 112 | 100    |
|    | 9                                                                                                                                                                                                                                                                                                                                                                                                                                                                                                                        | Hypothetical protein OsJ_15539 [Oryza sativa Japonica]                                               | gi 222629244 | 37523.9  | 6.89 | 2  | 121 | 100    | 116 | 100    |
|    | 10                                                                                                                                                                                                                                                                                                                                                                                                                                                                                                                       | OO_Ba0013J05-OO_Ba0033A15.6 [Oryza officinalis]                                                      | gi 260447006 | 56654.2  | 9.60 | 2  | 116 | 100    | 116 | 100    |
|    | MVSTLMAPASRAVAGKTPFLGARPAVASPLRDVAAAASNGRISMSELWYGPDRVKYLGPFSAQTPSYLSGEFPGDYGWDTAGLSADPEAFARNRALEVIHGRWAMLGALGCVFPEVLQKVVGVFEFKEPVWFKAGAQIFSEGGLDYLGNPNLVHAQSILAVLGSQVLLMGLVEGFRINGLDGVEGEGNDLYPGGQYFDPLGLADDPVTFaelkvKEIKNGRLAMFSMFQFFVQAIVTGKGPLENLFdHLDdDPVANNAWVFATKFAPGS                                                                                                                                                                                                                                            |                                                                                                      |              |          |      |    |     |        |     |        |
|    | 1                                                                                                                                                                                                                                                                                                                                                                                                                                                                                                                        | Chlorophyll a-b binding protein of LHCII type III, chloroplastic-like [Brachypodium distachyon]      | gi 357122389 | 28559.4  | 5.00 | 10 | 475 | 100    | 412 | 100    |
| 51 | 2                                                                                                                                                                                                                                                                                                                                                                                                                                                                                                                        | Chlorophyll a-b binding protein of LHCII type III, chloroplastic, Precursor                          | gi 115793    | 28740.5  | 4.99 | 9  | 469 | 100    | 412 | 100    |
|    | 3                                                                                                                                                                                                                                                                                                                                                                                                                                                                                                                        | Hypothetical protein SORBIDRAFT_02g036380 [Sorghum bicolor]                                          | gi 242045970 | 28716.6  | 5.11 | 6  | 76  | 97.404 | 48  | 94.948 |
|    | 4                                                                                                                                                                                                                                                                                                                                                                                                                                                                                                                        | LHCII Type III chlorophyll a/b binding protein [Brassica napus]                                      | gi 405617    | 24102.2  | 4.76 | 5  | 75  | 96.879 | 48  | 94.948 |
|    | 5                                                                                                                                                                                                                                                                                                                                                                                                                                                                                                                        | LHCII type III chlorophyll a/b binding protein [Wolffia australiana]                                 | gi 374434016 | 28504.4  | 5.01 | 5  | 72  | 94.189 | 48  | 94.948 |
|    | 6                                                                                                                                                                                                                                                                                                                                                                                                                                                                                                                        | Chlorophyll A/B binding protein, putative [Ricinus communis]                                         | gi 255569585 | 28855.6  | 5.11 | 5  | 70  | 89.425 | 48  | 94.948 |
|    | 7                                                                                                                                                                                                                                                                                                                                                                                                                                                                                                                        | Uncharacterized protein LOC100790960 [Glycine max]                                                   | gi 359806176 | 28676.5  | 5.11 | 5  | 70  | 89.179 | 48  | 94.948 |
|    | 8                                                                                                                                                                                                                                                                                                                                                                                                                                                                                                                        | Uncharacterized protein LOC100779387 [Glycine max]                                                   | gi 359807444 | 28793.5  | 5.11 | 5  | 70  | 88.927 | 48  | 94.948 |
|    | 9                                                                                                                                                                                                                                                                                                                                                                                                                                                                                                                        | Chlorophyll a-b binding protein of LHCII type III [Zea mays]                                         | gi 226509520 | 28984.7  | 5.11 | 5  | 69  | 87.576 | 48  | 94.948 |
|    | 10                                                                                                                                                                                                                                                                                                                                                                                                                                                                                                                       | Light-harvesting chlorophyll binding protein 3 [Solenostemon scutellarioides]                        | gi 157987285 | 20879.7  | 4.76 | 4  | 68  | 85.063 | 48  | 94.948 |
|    | GTRGHAVSRDLIHWRLPLAMVPDQWYDINGVWTGSATVLPDGLSVILYTGSTNASVQVQCLAVPADPNDSLLRNWTKYEANPILVPPPGIGDKDFRDPTTAWFDESDDKTWRTSSAPRDNHGHGTGIVMTYKTKDFINYLIPGLLHSPGTGMWECIDFYFVGADGSEELYVMKESSDDDRHDWYALGRYDAAANKYTPIDAEMDVIGLRYDWGKFYASKTFYDPSKNRRVLWGWIGETDSEADVAKGWASLQSIPTVELDEKTRTNLIQWPVVEIETLRI NSTDLGGTTIDTGSVLPLPLRRATQLDIEATFHLDTSAIAAVNEADVGYNCSTSGGAANRGALGPFGLLVADGALKEQTAVYFYVSRGLDGGQLTHFCQDESRSLSAQDVVKRVVGFTVPVLDGEDLSRLVLVDHSIVESFAM GGRSTANIEGVSDGGHLRRRWRVPFQQRHRCRHRGEARGARDGRLLQPDHLGRRCLSRLVAAINQALGPMVMIHPYYIL |                                                                                                      |              |          |      |    |     |        |     |        |
| 52 | 1                                                                                                                                                                                                                                                                                                                                                                                                                                                                                                                        | Vacuolar invertase [Triticum aestivum]                                                               | gi 3219509   | 56398.3  | 5.82 | 7  | 111 | 100    | 91  | 100    |
|    | 2                                                                                                                                                                                                                                                                                                                                                                                                                                                                                                                        | Powdery mildew resistance protein PM3C [Triticum aestivum]                                           | gi 82492377  | 159009.1 | 6.18 | 17 | 42  | 65.035 | 5   | 0      |
|    | 3                                                                                                                                                                                                                                                                                                                                                                                                                                                                                                                        | Powdery mildew resistance protein PM3 variant [Triticum aestivum]                                    | gi 225580397 | 157134.1 | 6.17 | 17 | 40  | 49.46  |     |        |
|    | 4                                                                                                                                                                                                                                                                                                                                                                                                                                                                                                                        | Powdery mildew resistance protein PM3 variant [Triticum aestivum]                                    | gi 225580393 | 157155.1 | 6.15 | 17 | 39  | 40.62  |     |        |
|    | 5                                                                                                                                                                                                                                                                                                                                                                                                                                                                                                                        | LEA D-11 dehydrin [Triticum aestivum]                                                                | gi 21624242  | 12820.1  | 7.21 | 5  | 36  | 0      |     |        |
|    | 6                                                                                                                                                                                                                                                                                                                                                                                                                                                                                                                        | Pm3 [Triticum aestivum]                                                                              | gi 296280016 | 158971   | 6.07 | 17 | 36  | 0      |     |        |
|    | 7                                                                                                                                                                                                                                                                                                                                                                                                                                                                                                                        | Powdery mildew resistance protein PM3 variant [Triticum aestivum]                                    | gi 225580395 | 158673.9 | 6.19 | 17 | 35  | 0      |     |        |
|    | 8                                                                                                                                                                                                                                                                                                                                                                                                                                                                                                                        | Powdery mildew resistance protein PM3 variant [Triticum aestivum]                                    | gi 225580391 | 158700.9 | 6.19 | 17 | 35  | 0      |     |        |
|    | 9                                                                                                                                                                                                                                                                                                                                                                                                                                                                                                                        | Powdery mildew resistance protein PM3 variant [Triticum aestivum]                                    | gi 225580379 | 158875   | 6.18 | 16 | 34  | 0      |     |        |
|    | 10                                                                                                                                                                                                                                                                                                                                                                                                                                                                                                                       | Pm3 [Triticum aestivum]                                                                              | gi 296280026 | 159148.2 | 6.30 | 17 | 33  | 0      |     |        |
| 53 | MLVYQDKLSGDELLSDSFYRELENGVLWEVDGHWVVGAVDVIDIGANPSAEGGGDDEGVDDQAVKVVVDIVDTFRLQEQAFAFDKKQFISHMKRYIKNLSAKLEGDDLDAFKKNVESATKYLLSKLKDLOFFVVGESMHDDGGVVFAYYKEGAADPTFLYFAHGLKEVKC                                                                                                                                                                                                                                                                                                                                               |                                                                                                      |              |          |      |    |     |        |     |        |
|    | 1                                                                                                                                                                                                                                                                                                                                                                                                                                                                                                                        | Translationally-controlled tumor protein [Triticum aestivum]                                         | gi 146285306 | 18766.3  | 4.55 | 9  | 486 | 100    | 413 | 100    |
|    | 2                                                                                                                                                                                                                                                                                                                                                                                                                                                                                                                        | Translationally-controlled tumor protein homolog                                                     | gi 75246527  | 18794.3  | 4.55 | 9  | 486 | 100    | 413 | 100    |
|    | 3                                                                                                                                                                                                                                                                                                                                                                                                                                                                                                                        | Ribulose-1,5-bisphosphate carboxylase/oxygenase small subunit [Triticum aestivum]                    | gi 11990893  | 19500.8  | 9.06 | 5  | 26  | 0      |     |        |
|    | 4                                                                                                                                                                                                                                                                                                                                                                                                                                                                                                                        | Ribulose-1,5-bisphosphate carboxylase/oxygenase small subunit [Triticum aestivum]                    | gi 11990897  | 19447.8  | 8.80 | 5  | 26  | 0      |     |        |
|    | 5                                                                                                                                                                                                                                                                                                                                                                                                                                                                                                                        | NBS-LRR type RGA [Triticum aestivum]                                                                 | gi 74121555  | 20107.3  | 8.82 | 5  | 25  | 0      |     |        |
|    | 6                                                                                                                                                                                                                                                                                                                                                                                                                                                                                                                        | NBS-LRR type RGA [Triticum aestivum]                                                                 | gi 74121546  | 19123.7  | 6.95 | 5  | 25  | 0      |     |        |
|    | 7                                                                                                                                                                                                                                                                                                                                                                                                                                                                                                                        | Ribulose-bisphosphate carboxylase (EC 4.1.1.39) small chain precursor (clone 234) - wheat (fragment) | gi 82619     | 15344.9  | 8.95 | 4  | 23  | 0      |     |        |
|    | 8                                                                                                                                                                                                                                                                                                                                                                                                                                                                                                                        | Putative Zn-finger transcription factor [Triticum aestivum]                                          | gi 60100212  | 19391.2  | 8.09 | 4  | 22  | 0      |     |        |
|    | 9                                                                                                                                                                                                                                                                                                                                                                                                                                                                                                                        | Glycosyltransferase, HGA-like [Triticum aestivum], putative, expressed                               | gi 300681530 | 68832    | 6.38 | 8  | 22  | 0      |     |        |
|    | 10                                                                                                                                                                                                                                                                                                                                                                                                                                                                                                                       | Bowman-Birk trypsin inhibitor-like protein [Triticum aestivum]                                       | gi 162319710 | 9856.6   | 8.67 | 4  | 22  | 0      |     |        |
|    | MEGEKNSSGDLMSSSKLVAEAARTAYEKKSVEGIDKEKVAASADILDSAAKYGKLEDKPVGQYLEKAEYLLKQYSSGGAEKTDAPAAADAPKPDAPKEPAPAPAPAVEEEKSSDGFGLDDVMKGAAASLGKKGDGEEKE SGGGGFMKMAQQGFMK                                                                                                                                                                                                                                                                                                                                                             |                                                                                                      |              |          |      |    |     |        |     |        |
|    | 1                                                                                                                                                                                                                                                                                                                                                                                                                                                                                                                        | Predicted protein [Hordeum vulgare subsp. vulgare]                                                   | gi 326520557 | 16184.9  | 4.75 | 5  | 200 | 100    | 173 | 100    |

|    |                                                                                                                                                                                                                                                                                    |                                                                                                |              |          |      |    |     |        |     |        |
|----|------------------------------------------------------------------------------------------------------------------------------------------------------------------------------------------------------------------------------------------------------------------------------------|------------------------------------------------------------------------------------------------|--------------|----------|------|----|-----|--------|-----|--------|
| 54 | 2                                                                                                                                                                                                                                                                                  | Predicted protein [Physcomitrella patens subsp. patens]                                        | gi 168060960 | 33045.9  | 4.41 | 4  | 61  | 17.915 | 48  | 93.586 |
|    | 3                                                                                                                                                                                                                                                                                  | Hydroxysteroid 11-beta-dehydrogenase 1-like protein-like [Brachypodium distachyon], predicted  | gi 357163124 | 38739.3  | 9.02 | 11 | 57  | 0      |     |        |
|    | 4                                                                                                                                                                                                                                                                                  | Hypothetical protein OsI_28484 [Oryza sativa Indica Group]                                     | gi 125560799 | 88651.5  | 6.02 | 5  | 56  | 0      | 48  | 93.542 |
|    | 5                                                                                                                                                                                                                                                                                  | Hydroxycinnamoyl-Coenzyme A shikimate/quininate hydroxycinnamoyltransferase-like [Glycine max] | gi 356527016 | 52294.9  | 8.67 | 9  | 54  | 0      |     |        |
|    | 6                                                                                                                                                                                                                                                                                  | Hypothetical protein OsJ_15032 [Oryza sativa Japonica Group]                                   | gi 222628982 | 8212.2   | 9.89 | 2  | 53  | 0      | 43  | 79.845 |
|    | 7                                                                                                                                                                                                                                                                                  | OSJNBa0036B21.9 [Oryza sativa Japonica Group]                                                  | gi 21740895  | 12329.1  | 9.57 | 2  | 52  | 0      | 43  | 79.845 |
|    | 8                                                                                                                                                                                                                                                                                  | Os01g0925800 [Oryza sativa Japonica Group]                                                     | gi 115441959 | 21309.6  | 4.95 | 8  | 52  | 0      |     |        |
|    | 9                                                                                                                                                                                                                                                                                  | Os04g0457400 [Oryza sativa Japonica Group]                                                     | gi 297602845 | 13572    | 9.73 | 3  | 51  | 0      | 43  | 79.845 |
|    | 10                                                                                                                                                                                                                                                                                 | Ubiquitin-conjugating enzyme E2 27-like [Brachypodium distachyon], predicted                   | gi 357126604 | 21406.7  | 4.84 | 8  | 51  | 0      |     |        |
|    | MATTAMALSPSSFAGKAVKDLPSALFGEARVTMRKTAAKAPVSSGSPWYGS DRVLYLGLPLSGDPPSYLTGEFPGDYGWDTAGLSADPETFAKNRELEVIHCRWAMLGALGCVFPELLARNGVKFGAEAVWFKAGSQIFSEGGLDYLGNPSLVHAQSILAIWACQVVLGMGAVEGYRVAGGPLGEIVDPLYPGGSFDPLGLADDPFAFAELKVKEIKNGRLAMFSMFQFFVQAIVTGKGPLENLADHLSDPVNNNAWAFATNFVPGK       |                                                                                                |              |          |      |    |     |        |     |        |
| 55 | 1                                                                                                                                                                                                                                                                                  | Chloroplast light-harvesting chlorophyll a/b binding protein [Triticum aestivum]               | gi 302566696 | 28196.2  | 5.14 | 6  | 330 | 100    | 298 | 100    |
|    | 2                                                                                                                                                                                                                                                                                  | Chlorophyll a/b-binding protein WCAB precursor [Triticum aestivum]                             | gi 1657859   | 28206.3  | 5.30 | 5  | 253 | 100    | 230 | 100    |
|    | 3                                                                                                                                                                                                                                                                                  | Chlorophyll a-b binding protein, chloroplastic                                                 | gi 115782    | 28246.3  | 5.67 | 3  | 178 | 100    | 168 | 100    |
|    | 4                                                                                                                                                                                                                                                                                  | Chlorophyll a-b binding protein [Triticum aestivum]                                            | gi 225690798 | 21229.7  | 5.55 | 2  | 69  | 99.933 | 61  | 100    |
|    | 5                                                                                                                                                                                                                                                                                  | Chlorophyll a-b binding protein [Triticum aestivum]                                            | gi 225690800 | 23022.6  | 5.50 | 2  | 68  | 99.927 | 61  | 100    |
|    | 6                                                                                                                                                                                                                                                                                  | Chlorophyll a-b binding protein [Triticum aestivum]                                            | gi 225690804 | 28482.3  | 5.13 | 2  | 68  | 99.912 | 61  | 100    |
|    | 7                                                                                                                                                                                                                                                                                  | Cold acclimation protein WCOR615 [Triticum aestivum]                                           | gi 1657857   | 17773.5  | 4.92 | 6  | 33  | 0      |     |        |
|    | 8                                                                                                                                                                                                                                                                                  | MYB-related protein [Triticum aestivum]                                                        | gi 359952798 | 42359.3  | 9.48 | 6  | 31  | 0      | 16  | 73.061 |
|    | 9                                                                                                                                                                                                                                                                                  | WRKY45-like transcription factor [Triticum aestivum]                                           | gi 341864987 | 31615.3  | 5.92 | 7  | 28  | 0      |     |        |
|    | 10                                                                                                                                                                                                                                                                                 | Heat shock protein HSP26 [Triticum aestivum]                                                   | gi 4028573   | 26573.3  | 7.88 | 6  | 26  | 0      |     |        |
| 56 | MTGCVNSISPPPVTLYRHRASPSRSFSLSGDALHSLYRHRVSRSPSIAPKFQIVAAEKSEPLKIMISGAPASGKGTOCELITHKYGLVHISAGDLLRAEIASGSENGRRAKEHMEKGQLPDEIVMMVKDRLSQTDSEQKGWLLDGYPRSASQATALKGFGQPDLFIVLEVPPEILIERVVGRRLDPTVGKIIHLKYSPPETEEIAVRLTQRFDTEEKAKRLKTHNQNVSDVLSMYDDITIKIEGNRSKEEVFAQIDSSSELLQERNTAPSSLLS |                                                                                                |              |          |      |    |     |        |     |        |
|    | 1                                                                                                                                                                                                                                                                                  | Predicted protein [Hordeum vulgare subsp. vulgare]                                             | gi 326510901 | 29327.9  | 9.00 | 8  | 189 | 100    | 145 | 100    |
|    | 2                                                                                                                                                                                                                                                                                  | Predicted protein [Hordeum vulgare subsp. vulgare]                                             | gi 326514018 | 29328.9  | 8.69 | 8  | 189 | 100    | 145 | 100    |
|    | 3                                                                                                                                                                                                                                                                                  | Os08g0109300 [Oryza sativa Japonica Group]                                                     | gi 115474427 | 31796.9  | 7.71 | 7  | 132 | 100    | 101 | 100    |
|    | 4                                                                                                                                                                                                                                                                                  | Hypothetical protein OsJ_25775 [Oryza sativa Japonica]                                         | gi 125601941 | 26078.9  | 9.00 | 6  | 126 | 100    | 101 | 100    |
|    | 5                                                                                                                                                                                                                                                                                  | Adenylate kinase, chloroplastic-like [Brachypo, predicted distachyon]                          | gi 357139457 | 31257.5  | 8.42 | 6  | 124 | 100    | 101 | 100    |
|    | 6                                                                                                                                                                                                                                                                                  | Adenosine monophosphate kinase [Arabidopsis thaliana]                                          | gi 15238822  | 31432.3  | 7.11 | 3  | 110 | 99.999 | 101 | 100    |
|    | 7                                                                                                                                                                                                                                                                                  | Predicted protein [Hordeum vulgare subsp. vulgare]                                             | gi 326527727 | 12323.3  | 5.60 | 6  | 76  | 97.404 | 35  | 0      |
|    | 8                                                                                                                                                                                                                                                                                  | Hypothetical protein ARALYDRAFT_917605 [Arabidopsis lyrata subsp. lyrata]                      | gi 297791885 | 33104.2  | 9.10 | 3  | 72  | 94.189 | 64  | 99.838 |
|    | 9                                                                                                                                                                                                                                                                                  | Os06g0343100 [Oryza sativa Japonica Group]                                                     | gi 115467950 | 121329.4 | 6.43 | 11 | 70  | 90.575 | 54  | 98.507 |
|    | 10                                                                                                                                                                                                                                                                                 | Hypothetical protein OsJ_21250 [Oryza sativa Japonica]                                         | gi 125597126 | 118172.8 | 6.28 | 10 | 67  | 80.309 | 54  | 98.507 |
| 57 | MAMASSGLRSCSAVGVPSSLAPSSLSGRSGLPFCAYATTSGRVMTSAEWFPGQPRPAHLDGSSPGDFGFDPLGLATVPENFERFKESIEIHCRWAMLCVPGVLVPEALGLGNWVKAQEWAAALPDGQATYLGPNPVPWGNLPTILAIIEFLAIAFAEQRTMEKDPEKKYPGGAFDPLGFSKDPKAKFEELKLEIKNGRLAMLAFFGVFCVQQSAYPGTGPLENPGTHLADPWHTSATSSFFPEYLPPLTGPTG                      |                                                                                                |              |          |      |    |     |        |     |        |
|    | 1                                                                                                                                                                                                                                                                                  | Chlorophyll a-b binding protein [Triticum aestivum]                                            | gi 225690802 | 30914.2  | 6.12 | 7  | 102 | 100    | 68  | 100    |
|    | 2                                                                                                                                                                                                                                                                                  | Chlorophyll a-b binding protein [Triticum aestivum]                                            | gi 225690794 | 26958.4  | 5.42 | 6  | 97  | 100    | 68  | 100    |
|    | 3                                                                                                                                                                                                                                                                                  | Unknown protein [Triticum aestivum]                                                            | gi 374086126 | 34351.5  | 6.41 | 7  | 27  | 0      |     |        |
|    | 4                                                                                                                                                                                                                                                                                  | RING finger protein [Triticum aestivum]                                                        | gi 353167263 | 16927.8  | 8.04 | 5  | 27  | 0      |     |        |
|    | 5                                                                                                                                                                                                                                                                                  | LEA D-11 dehydrin [Triticum aestivum]                                                          | gi 21624242  | 12820.1  | 7.21 | 4  | 25  | 0      |     |        |
|    | 6                                                                                                                                                                                                                                                                                  | Cold-regulated protein 15b [Arabidopsis thaliana]                                              | gi 15227952  | 14951.7  | 6.62 | 4  | 25  | 0      |     |        |
|    | 7                                                                                                                                                                                                                                                                                  | Unnamed protein product [Triticum aestivum]                                                    | gi 300681470 | 24476.1  | 6.77 | 6  | 23  | 0      |     |        |
|    | 8                                                                                                                                                                                                                                                                                  | Putative protein [Triticum aestivum]                                                           | gi 283099379 | 57999.7  | 5.26 | 7  | 22  | 0      |     |        |
|    | 9                                                                                                                                                                                                                                                                                  | STK protein kinase [Triticum aestivum]                                                         | gi 71912119  | 19049.6  | 6.47 | 4  | 21  | 0      |     |        |
|    | 10                                                                                                                                                                                                                                                                                 | NAC transcription factor 2B [Triticum aestivum]                                                | gi 293631969 | 36468.9  | 6.47 | 6  | 20  | 0      |     |        |
|    | MAAATSGAVLNGLGSSFLSGGNRSQTLLATAIGGKVGA AAVTVSPRRLIVVAAAAPKKS WLPGVRGGGNLVDPEWLDGSLPGDYGFDP LGLGKDP AFLK WYREAE LIHGRWMAAAVLGIFVGQAWSGVPWF EAGADPN AIA PFSGTLLGTQLILMGWVESKRWVDFNPD SQSVEWATPWSRTSENFANATGEQGYPGGKFDP LSLAGTIKDG VYIPDTEKLERLKLAEIKHARIAMLAMLIFFYF EAGQGKTPLGALGL   |                                                                                                |              |          |      |    |     |        |     |        |
|    | 1                                                                                                                                                                                                                                                                                  | Predicted protein [Hordeum vulgare subsp. vulgare]                                             | gi 326487444 | 27374.1  | 6.75 | 11 | 475 | 100    | 402 | 100    |
|    | 2                                                                                                                                                                                                                                                                                  | Hypothetical protein SORBIDRAFT_06g032690 [Sorghum bicolor]                                    | gi 242074752 | 27337.2  | 7.90 | 8  | 367 | 100    | 325 | 100    |

|    |                                                                                                                                                                                                                              |                                                                                                     |              |          |      |    |     |     |     |        |
|----|------------------------------------------------------------------------------------------------------------------------------------------------------------------------------------------------------------------------------|-----------------------------------------------------------------------------------------------------|--------------|----------|------|----|-----|-----|-----|--------|
| 58 | 3                                                                                                                                                                                                                            | Chlorophyll a-b binding protein CP24 10A, chloroplastic [Glycine max], predicted                    | gi 356525886 | 27668.3  | 6.15 | 6  | 301 | 100 | 274 | 100    |
|    | 4                                                                                                                                                                                                                            | Uncharacterized protein LOC100527463 [Glycine max]                                                  | gi 351728089 | 27569.3  | 7.93 | 4  | 289 | 100 | 274 | 100    |
|    | 5                                                                                                                                                                                                                            | Lhcb6 protein [Arabidopsis lyrata subsp. lyrata]                                                    | gi 297850008 | 27440.1  | 6.75 | 9  | 222 | 100 | 172 | 100    |
|    | 6                                                                                                                                                                                                                            | Chlorophyll A/B binding protein, putative [Ricinus communis]                                        | gi 255585659 | 27383    | 6.85 | 8  | 214 | 100 | 172 | 100    |
|    | 7                                                                                                                                                                                                                            | Lhcb6 protein [Brassica rapa subsp. pekinensis]                                                     | gi 50313237  | 27324.1  | 8.07 | 7  | 206 | 100 | 172 | 100    |
|    | 8                                                                                                                                                                                                                            | Chlorophyll a-b binding protein CP24 10A, chloroplastic-like [Glycine max], predicted               | gi 356512075 | 27471    | 6.43 | 7  | 206 | 100 | 172 | 100    |
|    | 9                                                                                                                                                                                                                            | Chloroplast a/b binding protein cab-PhE11, partial [Lolium perenne]                                 | gi 375152108 | 17334.8  | 5.12 | 5  | 199 | 100 | 172 | 100    |
|    | 10                                                                                                                                                                                                                           | H0523F07.10 [Oryza sativa Indica Group]                                                             | gi 116309995 | 26998.9  | 6.75 | 6  | 199 | 100 | 172 | 100    |
|    | MMFKIWRCSDDSSCSLPGDYGFDPGLSDPEGTGGFIEPRWLAYGEIINGRFAMLGAAGAIAPeILGKAGLIPAEtALPWFQTVGPVAGTYTYWADNYTLFVLEMALMGFAEHRRLLQDWYNPGSMGKQYFLGLEKGLAGSGNP<br>AYPGGPFNPLGFGKDEKSLKELKKEVKNGRLLAMLAILGYFIQGLTVGVGPYNLLDHLADPVNNNVLTSLKFH |                                                                                                     |              |          |      |    |     |     |     |        |
|    | 1                                                                                                                                                                                                                            | Predicted protein [Hordeum vulgare subsp. vulgare]                                                  | gi 326514018 | 29328.9  | 8.69 | 8  | 565 | 100 | 518 | 100    |
| 59 | 2                                                                                                                                                                                                                            | Predicted protein [Hordeum vulgare subsp. vulgare]                                                  | gi 326510901 | 29327.9  | 9.00 | 8  | 445 | 100 | 398 | 100    |
|    | 3                                                                                                                                                                                                                            | Chlorophyll a-b binding protein 8 [Zea mays]                                                        | gi 195613254 | 28965.9  | 8.94 | 6  | 183 | 100 | 156 | 100    |
|    | 4                                                                                                                                                                                                                            | Chlorophyll a-b binding protein 8 [Zea mays]                                                        | gi 226496924 | 16792.6  | 6.82 | 4  | 177 | 100 | 156 | 100    |
|    | 5                                                                                                                                                                                                                            | Chlorophyll a-b binding protein 8, chloroplastic-like [Brachypodium distachyon], predicted          | gi 357139429 | 12632.5  | 8.04 | 3  | 173 | 100 | 156 | 100    |
|    | 6                                                                                                                                                                                                                            | Chloroplast PSI type III chlorophyll a/b-binding protein [Helianthus annuus]                        | gi 159138869 | 13850.8  | 4.51 | 3  | 172 | 100 | 156 | 100    |
|    | 7                                                                                                                                                                                                                            | Chain 3, The Structure Of A Plant Photosystem I Supercomplex At 3.4 Angstrom Resolution             | gi 149242542 | 17903.3  | 6.95 | 3  | 169 | 100 | 156 | 100    |
|    | 8                                                                                                                                                                                                                            | Chloroplast photosystem II light harvesting complex protein type III, partial [Oxytropis splendens] | gi 359754921 | 21416.7  | 5.03 | 3  | 168 | 100 | 156 | 100    |
|    | 9                                                                                                                                                                                                                            | Chlorophyll a-b binding protein [Medicago truncatula]                                               | gi 357495589 | 61481.6  | 8.73 | 5  | 167 | 100 | 153 | 100    |
|    | 10                                                                                                                                                                                                                           | Light-harvesting complex I chlorophyll a/b binding protein 3 [Arabidopsis thaliana]                 | gi 79320443  | 23731    | 5.62 | 3  | 167 | 100 | 156 | 100    |
|    | MSSPSRRSSSPESNIDGGSGSGAGDERKKRMLSNRESARRSRARKQQRMEELIAEASRLQAENKRVEAQIGAYTTTELTKVDGENAVLRLRHGELAGRLQALGGVLEIFQVAGAPVDIPEIPDPLLRPWQSPFAPQLATAGGMP<br>DAFQF                                                                    |                                                                                                     |              |          |      |    |     |     |     |        |
| 60 | 1                                                                                                                                                                                                                            | bZIP transcription factor [Triticum aestivum]                                                       | gi 62898531  | 16274.3  | 9.67 | 2  | 34  | 0   | 26  | 97.306 |
|    | 2                                                                                                                                                                                                                            | ABI3-interacting protein 2-2 [Triticum aestivum]                                                    | gi 223470527 | 36138.1  | 5.10 | 8  | 33  | 0   |     |        |
|    | 3                                                                                                                                                                                                                            | Basic region/leucine zipper protein [Triticum aestivum]                                             | gi 165974314 | 16187.3  | 9.38 | 1  | 30  | 0   | 26  | 97.306 |
|    | 4                                                                                                                                                                                                                            | Serine/threonine protein kinase [Triticum aestivum]                                                 | gi 14571547  | 45928.1  | 8.39 | 8  | 28  | 0   |     |        |
|    | 5                                                                                                                                                                                                                            | Amylogenin [Triticum aestivum]                                                                      | gi 4158230   | 38841.7  | 6.19 | 7  | 27  | 0   |     |        |
|    | 6                                                                                                                                                                                                                            | Glycosyltransferase 47 [Triticum aestivum]                                                          | gi 301072484 | 46888.9  | 6.86 | 4  | 26  | 0   | 17  | 78.6   |
|    | 7                                                                                                                                                                                                                            | AP2-like protein [Triticum aestivum], putative                                                      | gi 40644766  | 19540.8  | 9.24 | 5  | 26  | 0   |     |        |
|    | 8                                                                                                                                                                                                                            | UDP-glucose glucosyltransferase [Triticum aestivum]                                                 | gi 86439711  | 50613.5  | 5.57 | 8  | 26  | 0   |     |        |
|    | 9                                                                                                                                                                                                                            | Glycosyltransferase, HGA-like [Triticum aestivum], putative,expressed                               | gi 300681530 | 68832    | 6.38 | 9  | 25  | 0   |     |        |
|    | 10                                                                                                                                                                                                                           | Rp1-like protein [Triticum aestivum]                                                                | gi 304325222 | 138477.8 | 8.32 | 8  | 24  | 0   | 15  | 67.461 |
| 61 | MECVIGVVGSDFAVVAADTSAVQSILVHKTDDEKIMLLDSHKLMGASGEPGDRVQFTEFIQKNLHLYQFRNNMPLSTAATANFTRGELATALRKPNPYSVNIILAGFDKDGASMYIYDIATLHKIDKGAFGYGSYFCLSLMDK<br>LYRPDMTVEEAVDLVDKCIKEIRLRLVAPQNFAIKIVDKDGARDYARREIGGDSPAVTTATATATATTA     |                                                                                                     |              |          |      |    |     |     |     |        |
|    | 1                                                                                                                                                                                                                            | Oxygen-evolving enhancer protein 2, chloroplastic                                                   | gi 131394    | 27252.8  | 8.84 | 15 | 688 | 100 | 562 | 100    |
|    | 2                                                                                                                                                                                                                            | 20S proteasome beta 4 subunit [Triticum aestivum]                                                   | gi 52548238  | 23313.8  | 5.57 | 10 | 142 | 100 | 70  | 100    |
|    | 3                                                                                                                                                                                                                            | Resistance protein CAN RGA1 [Triticum aestivum]                                                     | gi 33302329  | 101932.3 | 5.76 | 7  | 32  | 0   | 23  | 94.47  |
|    | 4                                                                                                                                                                                                                            | Resistance protein LR10 [Triticum aestivum]                                                         | gi 33302327  | 103919.1 | 5.61 | 6  | 32  | 0   | 23  | 94.47  |
|    | 5                                                                                                                                                                                                                            | Putative Zn-finger transcription factor [Triticum                                                   | gi 60100212  | 19391.2  | 8.09 | 5  | 30  | 0   |     |        |
|    | 6                                                                                                                                                                                                                            | U2AF small subunit [Triticum aestivum]                                                              | gi 68036691  | 36715.8  | 8.93 | 7  | 28  | 0   |     |        |
|    | 7                                                                                                                                                                                                                            | FIMBRIATA-like protein [Triticum aestivum]                                                          | gi 86439727  | 42631.9  | 8.55 | 7  | 28  | 0   |     |        |
|    | 8                                                                                                                                                                                                                            | Unnamed protein product [Triticum aestivum]                                                         | gi 300681540 | 18039.2  | 6.47 | 5  | 28  | 0   |     |        |
|    | 9                                                                                                                                                                                                                            | Glutathione-S-transferase [Triticum aestivum]                                                       | gi 34979592  | 14383.5  | 4.81 | 4  | 26  | 0   |     |        |
|    | 10                                                                                                                                                                                                                           | Profilin-1                                                                                          | gi 1346803   | 14972.4  | 4.91 | 4  | 26  | 0   |     |        |
|    | MAPIKLYGMMLSANVTRVTLLNELGLEDFVDVDLRTGAHKHPDFLKLNPFGQIPALQDGEVVFESRAINRYIATKYGASLLPTPSAKLEAWLEVESHFYPPARTLVYELVIKPMLGAPTDAAEVDKNAADLAKLLDVYE<br>AHLAAGNKYLAGDAFLADANHMSYLFMLTKSPKADLVASRPVKAWEIEISARPAWAKTVASIPLPVAV          |                                                                                                     |              |          |      |    |     |     |     |        |
|    | 1                                                                                                                                                                                                                            | Glutathione transferase F5 [Triticum aestivum]                                                      | gi 23504745  | 23422.2  | 5.78 | 11 | 556 | 100 | 470 | 100    |
|    | 2                                                                                                                                                                                                                            | S-like RNase [Triticum aestivum]                                                                    | gi 41400293  | 25041.9  | 5.84 | 5  | 26  | 0   |     |        |
|    | 3                                                                                                                                                                                                                            | LEA3 protein [Triticum aestivum]                                                                    | gi 25989707  | 21837.8  | 8.83 | 5  | 24  | 0   |     |        |

|    |                                                                                                                                                                                                                                                                                                                                                                                                                                                                                                                                                              |                                                                   |              |          |       |    |     |        |     |     |
|----|--------------------------------------------------------------------------------------------------------------------------------------------------------------------------------------------------------------------------------------------------------------------------------------------------------------------------------------------------------------------------------------------------------------------------------------------------------------------------------------------------------------------------------------------------------------|-------------------------------------------------------------------|--------------|----------|-------|----|-----|--------|-----|-----|
| 62 | 4                                                                                                                                                                                                                                                                                                                                                                                                                                                                                                                                                            | NAC transcription factor 6A [Triticum aestivum]                   | gi 293631975 | 1785.9   | 6.51  | 2  | 24  | 0      |     |     |
|    | 5                                                                                                                                                                                                                                                                                                                                                                                                                                                                                                                                                            | NBS-LRR type R protein [Triticum aestivum]                        | gi 29892701  | 18816    | 6.72  | 4  | 23  | 0      |     |     |
|    | 6                                                                                                                                                                                                                                                                                                                                                                                                                                                                                                                                                            | Mannose-binding lectin [Zea mays]                                 | gi 71370269  | 13043.2  | 6.54  | 4  | 23  | 0      |     |     |
|    | 7                                                                                                                                                                                                                                                                                                                                                                                                                                                                                                                                                            | Ribulose biphosphate carboxylase small chain clone 512            | gi 132107    | 13046.5  | 5.84  | 4  | 23  | 0      |     |     |
|    | 8                                                                                                                                                                                                                                                                                                                                                                                                                                                                                                                                                            | Xylanase inhibitor TL-XI precursor [Triticum aestivum]            | gi 110836641 | 15632.5  | 8.38  | 4  | 22  | 0      |     |     |
|    | 9                                                                                                                                                                                                                                                                                                                                                                                                                                                                                                                                                            | 60S ribosomal protein L5-2                                        | gi 55976534  | 34641.7  | 9.02  | 7  | 22  | 0      |     |     |
|    | 10                                                                                                                                                                                                                                                                                                                                                                                                                                                                                                                                                           | Starch synthase IV [Triticum aestivum]                            | gi 89214474  | 102969.4 | 5.91  | 10 | 21  | 0      |     |     |
|    | MALEAAYHYLQRAVGHGTSEALLTLVLLLIIRVAWVRAFTTTTASTKCKQQLPPTPPGKLPiIIGHLHLIGSHPHVSFRDLAAKHGRDGLMLVHVGA VPTVVVSTPQAAEAVLRTHDHVFASRPRNPVADIIRYNSTDI AFAPYGDYWRARKV VNTHTPLSVKMVYSKRHRDREEEVRLLVAKICELAMAAPGKALDMTELLGGYASDFVCRAVLGESH RKHGRNELFRELTEISASLLGGFNLEDYFPRLATLDVFLRVVCSKAMGVSKRWDNLFNELIAEYEHGKEDNAEDFVHLLLSLKKEYGLSTDNVKAILVNMFEAAIETSLVLEYSMAELINNRRHVM AKVRKEVRESTOPKGEKLDLIMEEDLSRMPYLKATIKEAMRIHPPAPFLLPHFSTNDCEVNGY TIPAGTRVIVNAWALARDPSHWERVEEFYPERFLQEGRDAEVD MYGKDTRFVPFGAGRRICAGATFTIATVEVMLANLIYHFDWELPSEME AIGAKVNM TDQFGMTLRRLRTERLHLVPKIYK |                                                                   |              |          |       |    |     |        |     |     |
|    | 1                                                                                                                                                                                                                                                                                                                                                                                                                                                                                                                                                            | P450 [Triticum aestivum]                                          | gi 51572463  | 59563.8  | 7.10  | 7  | 19  | 0      |     |     |
|    | 2                                                                                                                                                                                                                                                                                                                                                                                                                                                                                                                                                            | Abscisic acid-induced protein [Triticum aestivum]                 | gi 32400834  | 10950.2  | 11.74 | 4  | 18  | 0      |     |     |
| 63 | 3                                                                                                                                                                                                                                                                                                                                                                                                                                                                                                                                                            | Small heat shock protein Hsp23.6 [Triticum aestivum]              | gi 4138871   | 23622    | 5.25  | 4  | 17  | 0      |     |     |
|    | 4                                                                                                                                                                                                                                                                                                                                                                                                                                                                                                                                                            | P450 [Triticum aestivum]                                          | gi 48526685  | 59236.6  | 6.50  | 6  | 15  | 0      |     |     |
|    | 5                                                                                                                                                                                                                                                                                                                                                                                                                                                                                                                                                            | Mlo1 protein [Triticum aestivum]                                  | gi 14334169  | 60363.5  | 9.54  | 6  | 15  | 0      |     |     |
|    | 6                                                                                                                                                                                                                                                                                                                                                                                                                                                                                                                                                            | 26s proteasome non-ATPase regulatory subunit [Triticum aestivum]  | gi 340842127 | 34247.4  | 6.00  | 4  | 14  | 0      |     |     |
|    | 7                                                                                                                                                                                                                                                                                                                                                                                                                                                                                                                                                            | Mlo protein [Triticum aestivum]                                   | gi 46405855  | 47151.9  | 9.47  | 5  | 14  | 0      |     |     |
|    | 8                                                                                                                                                                                                                                                                                                                                                                                                                                                                                                                                                            | Annexin [Triticum aestivum]                                       | gi 38606205  | 35416.1  | 9.01  | 5  | 14  | 0      |     |     |
|    | 9                                                                                                                                                                                                                                                                                                                                                                                                                                                                                                                                                            | 40S ribosomal protein S9 [Triticum aestivum]                      | gi 32400776  | 7525     | 10.14 | 2  | 13  | 0      |     |     |
|    | 10                                                                                                                                                                                                                                                                                                                                                                                                                                                                                                                                                           | Hypothetical protein [Triticum aestivum]                          | gi 86439744  | 7050.5   | 8.61  | 2  | 13  | 0      |     |     |
|    | MASKVELVVVEVKSPAELWTAMRESTELFPKIFPEQYKSIETMEGDGKSAGTVRLIKYTEGVPMVTFAKEKVEVADDEKKVVSYSVVDGELVSFYKNFRVTVQVTDKGADGAGAVVNWMTMDFDKASDEVPEPDVIKETA AKTFHDLDDYLLKN                                                                                                                                                                                                                                                                                                                                                                                                  |                                                                   |              |          |       |    |     |        |     |     |
| 64 | 1                                                                                                                                                                                                                                                                                                                                                                                                                                                                                                                                                            | Salt tolerant protein [Triticum aestivum]                         | gi 63021412  | 17054.6  | 4.71  | 9  | 349 | 100    | 279 | 100 |
|    | 2                                                                                                                                                                                                                                                                                                                                                                                                                                                                                                                                                            | P450 [Triticum aestivum]                                          | gi 51572463  | 59563.8  | 7.10  | 8  | 27  | 0      |     |     |
|    | 3                                                                                                                                                                                                                                                                                                                                                                                                                                                                                                                                                            | Puroindoline-like protein [Triticum durum], putative              | gi 169788571 | 16703.3  | 9.07  | 6  | 26  | 0      |     |     |
|    | 4                                                                                                                                                                                                                                                                                                                                                                                                                                                                                                                                                            | Unknown protein [Triticum aestivum]                               | gi 374086126 | 34351.5  | 6.41  | 7  | 25  | 0      |     |     |
|    | 5                                                                                                                                                                                                                                                                                                                                                                                                                                                                                                                                                            | Os09g0485900 [Oryza sativa Japonica Group]                        | gi 115479853 | 21335.4  | 9.62  | 5  | 25  | 0      |     |     |
|    | 6                                                                                                                                                                                                                                                                                                                                                                                                                                                                                                                                                            | High-molecular-weight glutenin subunit [Triticum spelta]          | gi 32328651  | 15005.7  | 8.70  | 4  | 24  | 0      |     |     |
|    | 7                                                                                                                                                                                                                                                                                                                                                                                                                                                                                                                                                            | PINB-2v2-2 [Triticum aestivum]                                    | gi 376372849 | 16850.4  | 9.29  | 6  | 24  | 0      |     |     |
|    | 8                                                                                                                                                                                                                                                                                                                                                                                                                                                                                                                                                            | ATPase-like zinc transporter [Triticum aestivum], putative        | gi 95114390  | 110389.1 | 6.58  | 11 | 24  | 0      |     |     |
|    | 9                                                                                                                                                                                                                                                                                                                                                                                                                                                                                                                                                            | Glycosyltransferase [Triticum aestivum]                           | gi 56409844  | 65081    | 5.95  | 8  | 23  | 0      |     |     |
|    | 10                                                                                                                                                                                                                                                                                                                                                                                                                                                                                                                                                           | Serine/threonine kinase [Triticum aestivum], putative             | gi 86439758  | 29422.2  | 7.74  | 5  | 23  | 0      |     |     |
| 65 | MACTQENAMATDESTADHRRSRPSSHDM DLSGDDHVPKARKPYTTTKQREKWTEEEHKRFLEALQLHGRAWRRIQEHIGTKTAVQIRSHAQKFFSKVTRESSGSSSGSGAAAATATAAIQIPPPRPKRKPTHPYPRKADDGAAA GGKHAPGLTHLERPPVRMGEQEESPTS VLTASRVEASGGFRFSNSSGSRSPVPSAAGSLYGSSVDRGDGCLSPNTKTSEITANGNVKEGSCTGSATSVLKLFGKKVVVND SFQKPNTSTGNPQNGADVGEASDDTTTQGSRNLPSSGATEGSSWNPWPSNMQQFVYFVPQPDGFATQSAVPWFGLTPGAMFYQQA VAPNQHQHRHRS ETADHKFMQREGSWTGSNTGPGSAAHNSDAADSRGRGNISESDKTLVPRLT KCESVSISLQRGFMPYKRCAAESES LRSEAPREETD GELTRLCL                                                                                      |                                                                   |              |          |       |    |     |        |     |     |
|    | 1                                                                                                                                                                                                                                                                                                                                                                                                                                                                                                                                                            | MYB-related protein [Triticum aestivum]                           | gi 359952782 | 48051.4  | 8.93  | 11 | 54  | 97.893 |     |     |
|    | 2                                                                                                                                                                                                                                                                                                                                                                                                                                                                                                                                                            | Glycosyltransferase [Triticum aestivum]                           | gi 56409866  | 48626.6  | 6.28  | 9  | 40  | 52.833 | 3   | 0   |
|    | 3                                                                                                                                                                                                                                                                                                                                                                                                                                                                                                                                                            | TaGT61_1 [Triticum aestivum]                                      | gi 334353407 | 55806.6  | 8.45  | 9  | 36  | 0      | 3   | 0   |
|    | 4                                                                                                                                                                                                                                                                                                                                                                                                                                                                                                                                                            | Pm3 [Triticum aestivum]                                           | gi 296280016 | 158971   | 6.07  | 17 | 36  | 0      |     |     |
|    | 5                                                                                                                                                                                                                                                                                                                                                                                                                                                                                                                                                            | Pm3 [Triticum aestivum]                                           | gi 296280026 | 159148.2 | 6.30  | 17 | 34  | 0      |     |     |
|    | 6                                                                                                                                                                                                                                                                                                                                                                                                                                                                                                                                                            | Powdery mildew resistance protein PM3 variant                     | gi 225580375 | 157346.2 | 6.26  | 16 | 33  | 0      |     |     |
|    | 7                                                                                                                                                                                                                                                                                                                                                                                                                                                                                                                                                            | Pm3 [Triticum aestivum]                                           | gi 296280014 | 159019   | 6.14  | 16 | 31  | 0      |     |     |
|    | 8                                                                                                                                                                                                                                                                                                                                                                                                                                                                                                                                                            | Powdery mildew resistance protein PM3 variant [Triticum aestivum] | gi 225580385 | 159106.2 | 6.35  | 16 | 31  | 0      |     |     |
|    | 9                                                                                                                                                                                                                                                                                                                                                                                                                                                                                                                                                            | Mla-like protein [Triticum aestivum]                              | gi 24571201  | 60507.5  | 8.50  | 10 | 30  | 0      |     |     |
|    | 10                                                                                                                                                                                                                                                                                                                                                                                                                                                                                                                                                           | Ribosomal protein L16 [Triticum aestivum]                         | gi 254998340 | 10715.8  | 10.64 | 4  | 30  | 0      |     |     |
|    | MAPIGVGSTLPDQQLGWFDENDQLQVSIHSLATGKKVILFGVPGAFTPTCSNQHVPGFITQAEELKAKGVDEILLVSVNDP FVMKAWAKTYPENKHVKFLADGAAAYTKALGLELDL TEKGLGLRSRRFALLADDLKVTVANIEEGQFTISGAEEIMKAL                                                                                                                                                                                                                                                                                                                                                                                           |                                                                   |              |          |       |    |     |        |     |     |
|    | 1                                                                                                                                                                                                                                                                                                                                                                                                                                                                                                                                                            | Thioredoxin-dependent peroxidase [Leymus chinensis]               | gi 256708473 | 17388.1  | 5.17  | 11 | 362 | 100    | 266 | 100 |



|    |                                                                                                                                                                                                                             |                                                                                   |              |          |      |    |     |        |     |        |
|----|-----------------------------------------------------------------------------------------------------------------------------------------------------------------------------------------------------------------------------|-----------------------------------------------------------------------------------|--------------|----------|------|----|-----|--------|-----|--------|
| 66 | 2                                                                                                                                                                                                                           | Predicted protein [Hordeum vulgare subsp. vulgare]                                | gi 326501648 | 17312.1  | 5.17 | 6  | 202 | 100    | 164 | 100    |
|    | 3                                                                                                                                                                                                                           | Peroxiredoxin-2C-like [Brachypodium distachyon], predicted                        | gi 357135911 | 17366.1  | 5.35 | 6  | 202 | 100    | 164 | 100    |
|    | 4                                                                                                                                                                                                                           | Peroxiredoxin 5 cell rescue protein, partial [Lolium perenne]                     | gi 375152308 | 11445.1  | 5.13 | 5  | 169 | 100    | 134 | 100    |
|    | 5                                                                                                                                                                                                                           | MADS box transcription factor [Salvia coccinea]                                   | gi 343788119 | 24834.8  | 9.59 | 2  | 72  | 93.172 | 65  | 99.891 |
|    | 6                                                                                                                                                                                                                           | Deficiens [Salvia coccinea]                                                       | gi 42795291  | 26819.9  | 9.50 | 2  | 72  | 92.851 | 65  | 99.891 |
|    | 7                                                                                                                                                                                                                           | Os11g0238700 [Oryza sativa Japonica Group]                                        | gi 297611534 | 106593.5 | 8.76 | 19 | 61  | 23.394 |     |        |
|    | 8                                                                                                                                                                                                                           | Unknown [Picea sitchensis]                                                        | gi 224286654 | 71308.3  | 5.71 | 15 | 60  | 0      |     |        |
|    | 9                                                                                                                                                                                                                           | (-)-alpha/beta-pinene synthase [Picea sitchensis]                                 | gi 325930012 | 71324.3  | 5.71 | 15 | 59  | 0      |     |        |
|    | 10                                                                                                                                                                                                                          | Predicted protein [Populus trichocarpa]                                           | gi 224125614 | 44652.8  | 5.36 | 7  | 52  | 0      | 27  | 0      |
|    | MSDTEHHFESKADSGASKTYPQAGAIRKGHHIVIKARPCKVVEVSTSKTGKHGHAKCHFVAIDIFNGKKLEDIVPSSHNCVPHVDRQDYQLIDITDDGYVSLLTESGNTKDDLKLPTDDVLLGQIKTGFADGKDLILSVMS<br>AMGEEQICAVKEIGGGK                                                          |                                                                                   |              |          |      |    |     |        |     |        |
| 67 | 1                                                                                                                                                                                                                           | Eukaryotic translation initiation factor 5A1 [Triticum aestivum]                  | gi 74048999  | 17351.7  | 5.70 | 11 | 283 | 100    | 188 | 100    |
|    | 2                                                                                                                                                                                                                           | Eukaryotic translation initiation factor 5A3 [Triticum aestivum]                  | gi 74049040  | 17370.7  | 5.76 | 11 | 281 | 100    | 188 | 100    |
|    | 3                                                                                                                                                                                                                           | Kinase R-like protein [Triticum aestivum]                                         | gi 17981566  | 18856.8  | 8.73 | 6  | 34  | 0      |     |        |
|    | 4                                                                                                                                                                                                                           | Wheat win6-b defense protein [Triticum aestivum]                                  | gi 78096539  | 23013.3  | 9.37 | 6  | 30  | 0      |     |        |
|    | 5                                                                                                                                                                                                                           | Annexin [Triticum aestivum]                                                       | gi 38606205  | 35416.1  | 9.01 | 7  | 27  | 0      |     |        |
|    | 6                                                                                                                                                                                                                           | Ribulose-1,5-bisphosphate carboxylase/oxygenase large subunit [Triticum aestivum] | gi 339742637 | 21900    | 7.57 | 5  | 26  | 0      |     |        |
|    | 7                                                                                                                                                                                                                           | Cystatin [Triticum aestivum]                                                      | gi 194338899 | 26645.9  | 5.95 | 5  | 23  | 0      |     |        |
|    | 8                                                                                                                                                                                                                           | Basic region leucine zipper protein [Triticum aestivum]                           | gi 172052528 | 37902.1  | 8.94 | 6  | 23  | 0      |     |        |
|    | 9                                                                                                                                                                                                                           | Putative protein [Triticum aestivum]                                              | gi 283099379 | 57999.7  | 5.26 | 7  | 22  | 0      |     |        |
|    | 10                                                                                                                                                                                                                          | Avenin-like b11; Flags: Precursor                                                 | gi 338817631 | 32818    | 8.51 | 5  | 22  | 0      |     |        |
| 68 | MSDTEHHFESKADSGASKTYPQAGAIRKGHHIVIKARPCKVVEVSTSKTGKHGHAKCHFVAIDIFNGKKLEDIVPSSHNCVPHVDRQDYQLIDITDDGYVSLLTESGNTKDDLKLPTDDVLLGQIKTGFADGKDLILSVMS<br>AMGEEQICAVKEIGGGK                                                          |                                                                                   |              |          |      |    |     |        |     |        |
|    | 1                                                                                                                                                                                                                           | Eukaryotic translation initiation factor 5A1 [Triticum aestivum]                  | gi 74048999  | 17351.7  | 5.70 | 10 | 230 | 100    | 148 | 100    |
|    | 2                                                                                                                                                                                                                           | Eukaryotic translation initiation factor 5A3 [Triticum aestivum]                  | gi 74049040  | 17370.7  | 5.76 | 10 | 228 | 100    | 148 | 100    |
|    | 3                                                                                                                                                                                                                           | Zeta-carotene desaturase [Triticum aestivum]                                      | gi 336185123 | 62491    | 7.09 | 9  | 33  | 0      | 7   | 0      |
|    | 4                                                                                                                                                                                                                           | Cytochrome b6-f complex iron-sulfur subunit, chloroplastic                        | gi 68566191  | 23711    | 8.47 | 6  | 30  | 0      |     |        |
|    | 5                                                                                                                                                                                                                           | Pathogenesis-related protein 1 [Triticum aestivum]                                | gi 83031480  | 11185.2  | 6.88 | 4  | 29  | 0      |     |        |
|    | 6                                                                                                                                                                                                                           | Annexin [Triticum aestivum]                                                       | gi 38606205  | 35416.1  | 9.01 | 7  | 27  | 0      |     |        |
|    | 7                                                                                                                                                                                                                           | Putative protein [Triticum aestivum]                                              | gi 283099379 | 57999.7  | 5.26 | 8  | 27  | 0      |     |        |
|    | 8                                                                                                                                                                                                                           | Zeta-carotene desaturase [Triticum aestivum]                                      | gi 205371883 | 62501    | 6.81 | 8  | 26  | 0      | 6   | 0      |
|    | 9                                                                                                                                                                                                                           | Stress responsive protein [Triticum aestivum]                                     | gi 66277464  | 22159.6  | 7.64 | 5  | 26  | 0      |     |        |
| 69 | 10                                                                                                                                                                                                                          | Ferredoxin-NADP(H) oxidoreductase [Triticum aestivum]                             | gi 20302471  | 38781.6  | 8.29 | 7  | 25  | 0      |     |        |
|    | MASTALSTASNPQLCRTRASSLCKPVKGLGFRERIPRNTCMAGSISADRVPMDSKRELMNLLLGAIPLTFGMLVPYGSFLVPAGSGSNAGGVAAKDKLGNDILVEDWLKTHGPNDRTLAQLKGDPTYLVVESDKTLAT<br>YGINAVCTHLGCVVPWNAENKFLCPCHGSQYNNQGVVRGPAPLSLALVHADVDDGKVVFVPWVETDFRTGDNPPWWK |                                                                                   |              |          |      |    |     |        |     |        |
|    | 1                                                                                                                                                                                                                           | Cytochrome b6-f complex iron-sulfur subunit, chloroplastic                        | gi 68566191  | 23711    | 8.47 | 10 | 699 | 100    | 629 | 100    |
|    | 2                                                                                                                                                                                                                           | Zeta-carotene desaturase [Triticum aestivum]                                      | gi 336185123 | 62491    | 7.09 | 10 | 33  | 0      |     |        |
|    | 3                                                                                                                                                                                                                           | Glycosyltransferase [Triticum aestivum]                                           | gi 56409846  | 52982.5  | 6.14 | 3  | 33  | 0      | 26  | 97.304 |
|    | 4                                                                                                                                                                                                                           | WAL17 [Triticum aestivum]                                                         | gi 257135793 | 28053.7  | 6.99 | 6  | 30  | 0      |     |        |
|    | 5                                                                                                                                                                                                                           | cp31BHv [Triticum aestivum]                                                       | gi 226533870 | 18993.4  | 4.85 | 5  | 29  | 0      |     |        |
|    | 6                                                                                                                                                                                                                           | Zeta-carotene desaturase [Triticum aestivum]                                      | gi 205371883 | 62501    | 6.81 | 9  | 27  | 0      |     |        |
|    | 7                                                                                                                                                                                                                           | Glycosyl transferase [Triticum aestivum], putative                                | gi 342186837 | 65104.1  | 6.34 | 2  | 26  | 0      | 26  | 97.304 |
|    | 8                                                                                                                                                                                                                           | Starch synthase IIa-1 [Triticum aestivum]                                         | gi 7529653   | 86891.4  | 6.05 | 9  | 24  | 0      |     |        |
|    | 9                                                                                                                                                                                                                           | NBS-LRR type R protein [Triticum aestivum]                                        | gi 29892701  | 18816    | 6.72 | 4  | 24  | 0      |     |        |
|    | 10                                                                                                                                                                                                                          | Ribulose bisphosphate carboxylase                                                 | gi 132107    | 13046.5  | 5.84 | 4  | 24  | 0      |     |        |
|    | KAEAGPVDYEKEIKHHKLEIQIGKLGTVAGAYALHEKHEAKKDEPEHAHKHKEIEEIAAAAAIGAGGFATHEHHEKDAKKEEKAEGGHHHLF                                                                                                                                |                                                                                   |              |          |      |    |     |        |     |        |
|    | 1                                                                                                                                                                                                                           | ASR1 protein [Solanum peruvianum]                                                 | gi 321155395 | 10452.3  | 6.55 | 2  | 85  | 99.666 | 73  | 99.983 |
|    | 2                                                                                                                                                                                                                           | ASR1 protein [Solanum peruvianum]                                                 | gi 321155389 | 12698.3  | 6.50 | 2  | 84  | 99.559 | 73  | 99.983 |
|    | 3                                                                                                                                                                                                                           | CNL-B17 [Phaseolus vulgaris]                                                      | gi 270342130 | 126058.9 | 6.32 | 19 | 55  | 0      |     |        |

|    |                                                                                                                                                                                                                                      |                                                                                                                           |              |         |       |    |     |        |     |        |
|----|--------------------------------------------------------------------------------------------------------------------------------------------------------------------------------------------------------------------------------------|---------------------------------------------------------------------------------------------------------------------------|--------------|---------|-------|----|-----|--------|-----|--------|
| 70 | 4                                                                                                                                                                                                                                    | Predicted protein [Populus trichocarpa]                                                                                   | gi 224079477 | 11660.8 | 9.05  | 7  | 49  | 0      |     |        |
|    | 5                                                                                                                                                                                                                                    | Transcription initiation factor IIB-like [Brachypodium distachyon], predicted                                             | gi 357155150 | 32983.5 | 7.08  | 9  | 47  | 0      |     |        |
|    | 6                                                                                                                                                                                                                                    | Conserved hypothetical protein [Ricinus communis]                                                                         | gi 255539160 | 31914.5 | 7.56  | 10 | 45  | 0      |     |        |
|    | 7                                                                                                                                                                                                                                    | Predicted protein [Populus trichocarpa]                                                                                   | gi 224069738 | 32304.7 | 8.68  | 9  | 45  | 0      |     |        |
|    | 8                                                                                                                                                                                                                                    | Hypothetical protein [Oryza sativa Japonica Group]                                                                        | gi 12313669  | 21674.2 | 11.55 | 6  | 45  | 0      | 26  | 0      |
|    | 9                                                                                                                                                                                                                                    | GBSSI [Iochroma edule]                                                                                                    | gi 83755379  | 27986.1 | 7.59  | 8  | 45  | 0      |     |        |
|    | 10                                                                                                                                                                                                                                   | Contains similarity to gb AJ009695 wall-associated kinase 4 from Arabidopsis thaliana and contains a protein kinase PF000 | gi 6587818   | 77599.2 | 7.93  | 15 | 45  | 0      |     |        |
|    | MATAASLSALSSAAAGKRFLVSSPSLFSASRRLLAAPAHLRAAFPGPGARRVAAAATASPVVATIAVGDKLPDATLSYFDPADGELKTVTVGELTAGKKAVLFAVPGAFTPTCSQKHLPGFVAAAGDLRAKGVDTVACVSVNDAFVMKAWKESLGLGDDAGVMMLSDGNLELTRLALGVEMDLSDKPMGLGVRSRRYALLADDGVVKVLNLEEGGAFTSSAEEMLKVL |                                                                                                                           |              |         |       |    |     |        |     |        |
|    | 1                                                                                                                                                                                                                                    | Hypothetical protein Osl_06200 [Oryza sativa Indica]                                                                      | gi 125538439 | 23135.1 | 6.15  | 8  | 193 | 100    | 146 | 100    |
|    | 2                                                                                                                                                                                                                                    | Peroxiredoxin-2E-2, chloroplastic-like [Brachypodium distachyon], predicted                                               | gi 357139104 | 23212.1 | 6.74  | 6  | 176 | 100    | 146 | 100    |
| 71 | 3                                                                                                                                                                                                                                    | Hypothetical protein Osl_05717 [Oryza sativa Japonica]                                                                    | gi 125581128 | 23146.9 | 8.49  | 5  | 169 | 100    | 146 | 100    |
|    | 4                                                                                                                                                                                                                                    | Hypothetical protein Osl_22032 [Oryza sativa Japonica]                                                                    | gi 125597912 | 23672.6 | 9.32  | 5  | 132 | 100    | 110 | 100    |
|    | 5                                                                                                                                                                                                                                    | Mitochondrial peroxiredoxin-5 precursor [Oryza sativa]                                                                    | gi 149391349 | 2635.4  | 4.49  | 1  | 120 | 100    | 110 | 100    |
|    | 6                                                                                                                                                                                                                                    | Predicted protein [Hordeum vulgare subsp. vulgare]                                                                        | gi 326488016 | 23312.2 | 5.92  | 8  | 82  | 99.268 | 36  | 24.949 |
|    | 7                                                                                                                                                                                                                                    | Shikimate kinase, chloroplastic-like [Brachypodium distachyon], predicted                                                 | gi 357138119 | 32845.1 | 9.30  | 11 | 61  | 23.394 |     |        |
|    | 8                                                                                                                                                                                                                                    | Hypothetical protein SELMODRAFT_449084 [Selaginella moellendorffii]                                                       | gi 302823273 | 44556.8 | 6.54  | 12 | 58  | 0      |     |        |
|    | 9                                                                                                                                                                                                                                    | Predicted protein [Populus trichocarpa]                                                                                   | gi 224099459 | 13896   | 4.83  | 6  | 56  | 0      |     |        |
|    | 10                                                                                                                                                                                                                                   | Predicted protein [Hordeum vulgare subsp. vulgare]                                                                        | gi 326533332 | 32563.9 | 9.10  | 10 | 52  | 0      |     |        |
|    | MASTDSWTHEIESPVAAARLFRAGVMDWHTLAPKLAPHIVASAHPEVEGGIGSVRQFNFTSAMPFSLMKERLEFIDADKCECKSTLIEGGGIGTAIETTTSHIKVEPAANGGSVVKVESTYKLLPGVEVNDITKAKESVTAIFKAAEAYLVANPDAYN                                                                       |                                                                                                                           |              |         |       |    |     |        |     |        |
| 72 | 1                                                                                                                                                                                                                                    | Pathogenesis related protein 10 [Triticum aestivum]                                                                       | gi 196051131 | 17052.6 | 5.19  | 8  | 250 | 100    | 188 | 100    |
|    | 2                                                                                                                                                                                                                                    | Pathogenesis-related protein [Triticum aestivum]                                                                          | gi 162414848 | 17022.6 | 5.19  | 7  | 238 | 100    | 188 | 100    |
|    | 3                                                                                                                                                                                                                                    | Peroxidase [Triticum aestivum]                                                                                            | gi 21717531  | 32405.2 | 8.89  | 7  | 33  | 0      |     |        |
|    | 4                                                                                                                                                                                                                                    | Unnamed protein product [Triticum aestivum]                                                                               | gi 300681470 | 24476.1 | 6.77  | 7  | 31  | 0      |     |        |
|    | 5                                                                                                                                                                                                                                    | P450 [Triticum aestivum]                                                                                                  | gi 51572463  | 59563.8 | 7.10  | 9  | 30  | 0      |     |        |
|    | 6                                                                                                                                                                                                                                    | Cytochrome P450 [Triticum aestivum]                                                                                       | gi 26655528  | 59519.8 | 6.75  | 8  | 26  | 0      |     |        |
|    | 7                                                                                                                                                                                                                                    | Putative major allergen Phl p 5 [Triticum aestivum]                                                                       | gi 40644796  | 23934.2 | 5.06  | 5  | 26  | 0      |     |        |
|    | 9                                                                                                                                                                                                                                    | Conserved hypothetical protein, expressed [Triticum aestivum]                                                             | gi 300681478 | 39218.4 | 5.68  | 6  | 24  | 0      |     |        |
|    | 10                                                                                                                                                                                                                                   | Monomeric alpha-amylase inhibitor [Triticum monococcum]                                                                   | gi 134034506 | 13088.3 | 7.40  | 5  | 24  | 0      |     |        |
|    | MALETCLRGWALYAPQAGIRERLSSGSYAPSRPRTAAPAVVSPSPYKSALVAARRPSRFVCKCKNVVDEVIADEKNWDNMVIACESPVLVEFWAPWCGPCRMIAPVIDELAKDYGKIKCKKVNTDDCPNIASITYGIRSIPTVL                                                                                     |                                                                                                                           |              |         |       |    |     |        |     |        |
| 73 | MFKDGEKKESVIGAVPKTTLCTIIDKYIGS                                                                                                                                                                                                       |                                                                                                                           |              |         |       |    |     |        |     |        |
|    | 1                                                                                                                                                                                                                                    | Thioredoxin M-type, chloroplastic; Precursor                                                                              | gi 11135474  | 19119.7 | 8.67  | 7  | 208 | 100    | 172 | 100    |
|    | 2                                                                                                                                                                                                                                    | Ribulose biphosphate carboxylase small chain clone 512                                                                    | gi 132107    | 13046.5 | 5.84  | 5  | 32  | 0      |     |        |
|    | 3                                                                                                                                                                                                                                    | MYB-related protein [Triticum aestivum]                                                                                   | gi 359952782 | 48051.4 | 8.93  | 8  | 32  | 0      |     |        |
|    | 4                                                                                                                                                                                                                                    | Serine/threonine protein kinase Stpk-D [Triticum]                                                                         | gi 333385001 | 44526.8 | 7.63  | 7  | 28  | 0      |     |        |
|    | 5                                                                                                                                                                                                                                    | Unknown protein [Triticum aestivum]                                                                                       | gi 374086126 | 34351.5 | 6.41  | 7  | 28  | 0      |     |        |
|    | 6                                                                                                                                                                                                                                    | NBS-LRR type RGA [Triticum aestivum]                                                                                      | gi 74125019  | 9104.7  | 6.75  | 4  | 27  | 0      |     |        |
|    | 7                                                                                                                                                                                                                                    | S-like RNase [Triticum aestivum]                                                                                          | gi 41400293  | 25041.9 | 5.84  | 5  | 26  | 0      |     |        |
|    | 8                                                                                                                                                                                                                                    | Chain A, Crystal Structure Of A Mutant Beta-Glucosidase In Wheat Complexed With Dimboa-Glc                                | gi 326327792 | 63988.7 | 5.39  | 8  | 25  | 0      |     |        |
|    | 9                                                                                                                                                                                                                                    | Ribulose-1,5-bisphosphate carboxylase/oxygenase small subunit [Triticum aestivum]                                         | gi 11990893  | 19500.8 | 9.06  | 5  | 24  | 0      |     |        |
| 74 | 10                                                                                                                                                                                                                                   | Ribulose-1,5-bisphosphate carboxylase/oxygenase small subunit [Triticum aestivum]                                         | gi 11990897  | 19447.8 | 8.80  | 5  | 24  | 0      |     |        |
|    | AYLPPLSTEALLKQVDYLIRSKWVPCLEFSKVGIFREHNASPGYYDGRYWTMWKLPFMFGCTDATQVINEVEEVKKEYPDAYVRIIGFDNMRQVQCVSFIAPKPPGCEESGKA                                                                                                                    |                                                                                                                           |              |         |       |    |     |        |     |        |
|    | 1                                                                                                                                                                                                                                    | Ribulose biphosphate carboxylase small chain clone 512 (Fragment) [Triticum aestivum]                                     | RBS3_WHEAT   | 13046.5 | 5.84  | 6  | 40  | 95.994 |     |        |
|    | 2                                                                                                                                                                                                                                    | Bowman-Birk type proteinase inhibitor II-4 (Fragment) [Triticum aestivum]                                                 | IBB2_WHEAT   | 5948.5  | 8.45  | 5  | 20  | 0      |     |        |
|    | 3                                                                                                                                                                                                                                    | Phenylalanine ammonia-lyase [Triticum aestivum]                                                                           | PALY_WHEAT   | 75889.5 | 6.10  | 9  | 15  | 0      |     |        |
|    | 4                                                                                                                                                                                                                                    | Alpha-2-purothionin [Triticum aestivum]                                                                                   | THN2_WHEAT   | 14547.8 | 5.13  | 4  | 14  | 0      |     |        |
|    | 5                                                                                                                                                                                                                                    | Phosphoribulokinase, chloroplastic [Triticum aestivum]                                                                    | KPPR_WHEAT   | 45112.9 | 5.72  | 5  | 13  | 0      |     |        |
|    | 6                                                                                                                                                                                                                                    | Metallothionein-like protein 1 [Triticum aestivum]                                                                        | MT1_WHEAT    | 7371    | 4.44  | 2  | 12  | 0      |     |        |

|    |                                                                                                                                                                                                                                  |                                                                                                      |              |          |       |    |     |        |     |        |
|----|----------------------------------------------------------------------------------------------------------------------------------------------------------------------------------------------------------------------------------|------------------------------------------------------------------------------------------------------|--------------|----------|-------|----|-----|--------|-----|--------|
| 75 | 7                                                                                                                                                                                                                                | Endogenous alpha-amylase/subtilisin inhibitor [Triticum aestivum]                                    | IAAS WHEAT   | 19620.8  | 6.77  | 3  | 12  | 0      |     |        |
|    | 8                                                                                                                                                                                                                                | Cytochrome b559 subunit alpha [Triticum aestivum]                                                    | PSBE WHEAT   | 9438.7   | 4.64  | 2  | 12  | 0      |     |        |
|    | 9                                                                                                                                                                                                                                | Ribulose biphosphate carboxylase small chain PW9, chloroplastic [Triticum aestivum]                  | RBS2 WHEAT   | 19441.7  | 8.52  | 3  | 12  | 0      |     |        |
|    | 10                                                                                                                                                                                                                               | DNA-directed RNA polymerase subunit beta" [Triticum aestivum]                                        | RPOC2 WHEAT  | 169939   | 6.50  | 10 | 11  | 0      |     |        |
|    | MAPAVMASSATSVAFFQGLKSTAGLPVSRSSNGASLGSVSNNGRIRCMQVWPPIEGIKKFETLSYLPPLSTEALLKQVDYLIRSKWVPCLEFSKVGFIFREHNASPGYYDGRYWTMWKLPFGCTDATQVINEVEEVKKEYPDA<br>YVRIIGFDNMRQVCVSIKFAKPPGCEESGKA                                               |                                                                                                      |              |          |       |    |     |        |     |        |
|    | 1                                                                                                                                                                                                                                | Ribulose bisphosphate carboxylase small chain clone 512                                              | gi 132107    | 13046.5  | 5.84  | 10 | 196 | 100    | 107 | 100    |
|    | 2                                                                                                                                                                                                                                | Ribulose-1,5-bisphosphate carboxylase/oxygenase small subunit [Triticum aestivum]                    | gi 11990897  | 19447.8  | 8.80  | 11 | 188 | 100    | 107 | 100    |
|    | 3                                                                                                                                                                                                                                | Ribulose-1,5-bisphosphate carboxylase/oxygenase small subunit [Triticum aestivum]                    | gi 11990893  | 19500.8  | 9.06  | 11 | 187 | 100    | 107 | 100    |
|    | 4                                                                                                                                                                                                                                | Ribulose-1,5-bisphosphate carboxylase/oxygenase small subunit [Aegilops longissima]                  | gi 4038673   | 18533.4  | 8.83  | 11 | 127 | 100    | 42  | 99.898 |
|    | 5                                                                                                                                                                                                                                | Ribulose-1,5-bisphosphate carboxylase/oxygenase small subunit [Triticum aestivum]                    | gi 11990901  | 19448.8  | 8.81  | 9  | 102 | 100    | 42  | 99.898 |
| 76 | 6                                                                                                                                                                                                                                | Ribulose bisphosphate carboxylase small chain PW9, chloroplastic                                     | gi 132099    | 19441.7  | 8.52  | 8  | 91  | 100    | 42  | 99.898 |
|    | 7                                                                                                                                                                                                                                | Ribulosebiphosphate carboxylase [Triticum aestivum]                                                  | gi 755804    | 18119.9  | 8.95  | 7  | 91  | 100    | 42  | 99.898 |
|    | 8                                                                                                                                                                                                                                | Ribulose-bisphosphate carboxylase (EC 4.1.1.39) small chain precursor (clone 234) - wheat (fragment) | gi 82619     | 15344.9  | 8.95  | 7  | 90  | 100    | 42  | 99.898 |
|    | 9                                                                                                                                                                                                                                | Ribulose-1,5-bisphosphate carboxylase/oxygenase small subunit [Triticum aestivum]                    | gi 11990895  | 19420.8  | 8.99  | 8  | 90  | 100    | 42  | 99.898 |
|    | 10                                                                                                                                                                                                                               | Ribulose-1,5-bisphosphate carboxylase/oxygenase small ubunit [Triticum aestivum]                     | gi 11990899  | 19547.8  | 8.99  | 8  | 90  | 100    | 42  | 99.898 |
|    | MSWQTYVDDHLCEIDGQHLTSAAILGHDGSVWAQSPNFPQFKPEEIAIGIKDFEEPGHLAPTGLFLGGTKYMVIIQEGPGVVIRGKKGTTGGITIKKTGMALILGIYDEPMTPGQC�NLVVERLG DYLVEQGF                                                                                           |                                                                                                      |              |          |       |    |     |        |     |        |
|    | 1                                                                                                                                                                                                                                | Profilin [Triticum aestivum]                                                                         | gi 300807845 | 14182.1  | 4.89  | 5  | 129 | 100    | 91  | 100    |
|    | 2                                                                                                                                                                                                                                | Profilin [Triticum aestivum]                                                                         | gi 190684061 | 14153.1  | 4.93  | 5  | 71  | 99.963 | 33  | 99.474 |
|    | 3                                                                                                                                                                                                                                | Profilin [Triticum aestivum]                                                                         | gi 207366248 | 14154.1  | 5.04  | 4  | 62  | 99.666 | 33  | 99.474 |
|    | 4                                                                                                                                                                                                                                | Profilin-1                                                                                           | gi 1346803   | 14972.4  | 4.91  | 4  | 61  | 99.589 | 33  | 99.474 |
| 77 | 5                                                                                                                                                                                                                                | Profilin-3                                                                                           | gi 1346806   | 15201.5  | 5.78  | 4  | 61  | 99.57  | 33  | 99.474 |
|    | 6                                                                                                                                                                                                                                | Profilin-2                                                                                           | gi 1346804   | 15383.6  | 5.73  | 4  | 60  | 99.56  | 33  | 99.474 |
|    | 7                                                                                                                                                                                                                                | Ribulose-bisphosphate carboxylase (EC 4.1.1.39) small chain precursor (clone 234) - wheat (fragment) | gi 82619     | 15344.9  | 8.95  | 5  | 31  | 0      |     |        |
|    | 9                                                                                                                                                                                                                                | Translation initiation factor eIF5 [Triticum aestivum]                                               | gi 126513560 | 49000.7  | 5.56  | 8  | 26  | 0      |     |        |
|    | 10                                                                                                                                                                                                                               | Ribulose-1,5-bisphosphate carboxylase/oxygenase small subunit [Triticum aestivum]                    | gi 11990893  | 19500.8  | 9.06  | 5  | 25  | 0      |     |        |
|    | MALLLNVSLSKKLPFPILKPHLSFPKPHLNSSLFHNTNSATPQGNNGINFDHLHLSVTRGSFVALLSASFVDPALAFKGGGPYGAEVTRGQDLTGKDFSGKSLIKQDFKTSILRQANFKGANLLGASFFDADLTGADLSDADLR<br>GADFSLANVTKANLSNANLEGALATGNTSFRGSIITGADFTDVPREDQREYLCKVADGVNPTT<br>GNATRETLN |                                                                                                      |              |          |       |    |     |        |     |        |
|    | 1                                                                                                                                                                                                                                | Predicted protein [Hordeum vulgare subsp. vulgare]                                                   | gi 326506328 | 19578.9  | 10.17 | 9  | 628 | 100    | 566 | 100    |
|    | 2                                                                                                                                                                                                                                | Predicted protein [Hordeum vulgare subsp. vulgare]                                                   | gi 326523645 | 20905.6  | 6.06  | 8  | 568 | 100    | 520 | 100    |
|    | 3                                                                                                                                                                                                                                | Hypothetical protein VITISV_013914 [Vitis vinifera]                                                  | gi 147774410 | 23432.4  | 6.41  | 1  | 255 | 100    | 255 | 100    |
|    | 4                                                                                                                                                                                                                                | Thylakoid lumenal 15 kDa protein 1, chloroplastic [Vitis vinifera], predicted                        | gi 225449424 | 23417    | 6.50  | 1  | 255 | 100    | 255 | 100    |
| 78 | 5                                                                                                                                                                                                                                | Thylakoid lumenal 15 kDa protein 1, chloroplastic-like [Brachypodium distachyon], predicted          | gi 357133836 | 20732.5  | 6.71  | 6  | 228 | 100    | 197 | 100    |
|    | 6                                                                                                                                                                                                                                | Os01g0144100 [Oryza sativa Japonica Group]                                                           | gi 115434488 | 20561.5  | 6.71  | 4  | 146 | 100    | 130 | 100    |
|    | 7                                                                                                                                                                                                                                | Hypothetical protein OsJ_00337 [Oryza sativa Japonica]                                               | gi 222617721 | 51873.1  | 9.49  | 4  | 71  | 91.6   | 62  | 99.71  |
|    | 8                                                                                                                                                                                                                                | Hypothetical protein OsI_00358 [Oryza sativa Indica Group]                                           | gi 218187501 | 19899.2  | 6.71  | 2  | 69  | 87.576 | 62  | 99.71  |
|    | 9                                                                                                                                                                                                                                | CNL-B17 [Phaseolus vulgaris]                                                                         | gi 270342130 | 126058.9 | 6.32  | 19 | 56  | 0      |     |        |
|    | 10                                                                                                                                                                                                                               | Maturase K [Araucaria hunsteinii]                                                                    | gi 264684339 | 24374.9  | 9.65  | 9  | 50  | 0      |     |        |
|    | MAGRSNIPANNSALIAIADEDVTVTGFLMAGVGNVDLRKKTNYLLVDNKTTVKQIEDAFKEFTAREEDIAIVLISQYIANMIRFLVDSYNKPIPAILEIPSKDHPYDPASDSVLSRVKYLFSADSVASDRR                                                                                              |                                                                                                      |              |          |       |    |     |        |     |        |
|    | 1                                                                                                                                                                                                                                | Vacuolar ATPase subunit F [Triticum aestivum]                                                        | gi 94537548  | 14370.5  | 5.33  | 7  | 90  | 100    | 34  | 99.285 |
|    | 2                                                                                                                                                                                                                                | Powdery mildew resistance protein PM3C [Triticum aestivum]                                           | gi 82492377  | 159009.1 | 6.18  | 14 | 34  | 0      | 9   | 0      |
|    | 3                                                                                                                                                                                                                                | MYB-related protein [Triticum aestivum]                                                              | gi 359952782 | 48051.4  | 8.93  | 7  | 25  | 0      |     |        |
|    | 4                                                                                                                                                                                                                                | Powdery mildew resistance protein PM3 variant [Triticum aestivum]                                    | gi 225580375 | 157346.2 | 6.26  | 14 | 25  | 0      |     |        |
| 78 | 5                                                                                                                                                                                                                                | Pm3 [Triticum aestivum]                                                                              | gi 296280016 | 158971   | 6.07  | 14 | 25  | 0      |     |        |
|    | 6                                                                                                                                                                                                                                | LEA D-11 dehydrin [Triticum aestivum]                                                                | gi 21624242  | 12820.1  | 7.21  | 4  | 24  | 0      |     |        |
|    | 7                                                                                                                                                                                                                                | Annexin [Triticum aestivum]                                                                          | gi 38606205  | 35416.1  | 9.01  | 7  | 24  | 0      |     |        |
|    | 8                                                                                                                                                                                                                                | S-like RNase [Triticum aestivum]                                                                     | gi 41400293  | 25041.9  | 5.84  | 4  | 24  | 0      | 5   | 0      |
|    | 9                                                                                                                                                                                                                                | Powdery mildew resistance protein PM3 variant [Triticum aestivum]                                    | gi 225580385 | 159106.2 | 6.35  | 14 | 24  | 0      |     |        |

|    |    |                                                                                                                                                                                                                                                                                                                      |              |         |       |    |     |     |     |        |
|----|----|----------------------------------------------------------------------------------------------------------------------------------------------------------------------------------------------------------------------------------------------------------------------------------------------------------------------|--------------|---------|-------|----|-----|-----|-----|--------|
|    | 10 | Glycosyltransferase [Triticum aestivum]                                                                                                                                                                                                                                                                              | gi 56409844  | 65081   | 5.95  | 8  | 24  | 0   |     |        |
|    |    | AYLPPLSTEALLKQVDYLIRSKWVPCLEFSKVGFIREFHNASPGYYDGRYWTMWKLPFMFGCTDATQVINEVEEVKKEYPDAYVRIIGFDNMRQVQCVSFIAPKPPGCEESGKA                                                                                                                                                                                                   |              |         |       |    |     |     |     |        |
|    | 1  | Ribulose-1,5-bisphosphate carboxylase/oxygenase small subunit [Triticum aestivum]                                                                                                                                                                                                                                    | gi 11990901  | 19448.8 | 8.81  | 12 | 463 | 100 | 364 | 100    |
|    | 2  | Ribulose bisphosphate carboxylase small chain PWS4.3, chloroplastic                                                                                                                                                                                                                                                  | gi 132087    | 19404.8 | 8.99  | 10 | 437 | 100 | 364 | 100    |
|    | 3  | Ribulose bisphosphate carboxylase small chain PW9, chloroplastic                                                                                                                                                                                                                                                     | gi 132099    | 19441.7 | 8.52  | 12 | 414 | 100 | 317 | 100    |
|    | 4  | Ribulose-1,5-bisphosphate carboxylase/oxygenase small subunit [Triticum aestivum]                                                                                                                                                                                                                                    | gi 11990899  | 19547.8 | 8.99  | 11 | 401 | 100 | 317 | 100    |
| 79 | 5  | Ribulose-1,5-bisphosphate carboxylase/oxygenase small subunit [Triticum aestivum]                                                                                                                                                                                                                                    | gi 11990895  | 19420.8 | 8.99  | 11 | 366 | 100 | 281 | 100    |
|    | 6  | Ribulose-1,5-bisphosphate carboxylase/oxygenase small subunit [Aegilops longissima]                                                                                                                                                                                                                                  | gi 4038673   | 18533.4 | 8.83  | 11 | 339 | 100 | 248 | 100    |
|    | 7  | Ribulose-1,5-bisphosphate carboxylase/oxygenase small subunit [Triticum aestivum]                                                                                                                                                                                                                                    | gi 4038719   | 18518.4 | 8.83  | 11 | 336 | 100 | 248 | 100    |
|    | 8  | Ribulose-1,5-bisphosphate carboxylase/oxygenase small subunit [Aegilops searsii]                                                                                                                                                                                                                                     | gi 4038679   | 18588.4 | 9.01  | 11 | 336 | 100 | 248 | 100    |
|    | 9  | Ribulose-1,5-bisphosphate carboxylase/oxygenase small subunit [Triticum aestivum]                                                                                                                                                                                                                                    | gi 11990893  | 19500.8 | 9.06  | 12 | 216 | 100 | 119 | 100    |
|    | 10 | Ribulose bisphosphate carboxylase small chain clone 512                                                                                                                                                                                                                                                              | gi 132107    | 13046.5 | 5.84  | 9  | 199 | 100 | 119 | 100    |
|    |    | MVFVKNQKTRAYSKRFQVKFRRRRQGKTDYRARLRLTNQDKNKYNTPKYRFVVRFTNKDVTQAQIVYATIAGDIVMAAAYSHELPRYGLEVGLTNYAAAYCTGLLLARRVLKCRDLDDQYEGNVEATGEDFSVEPADERRPF<br>RALLDVGLIRTTTGNRVFGALKGALDGGDLIPHSDKRFAGFKKDEKQLDAEIHRYIYGGHVADYMKSLADEEPEKYQSHFSEYIKKGIEIDMEALYKKVHAAIRADPTVAKSTKEPPKTHKRYNPKKLTYEQRKASLVERL<br>NALNSSAGADVDEDDDE |              |         |       |    |     |     |     |        |
|    | 1  | Glycosyltransferase [Triticum aestivum]                                                                                                                                                                                                                                                                              | gi 56409844  | 65081   | 5.95  | 9  | 29  | 0   | 3   | 0      |
|    | 2  | DIP2 protein [Triticum aestivum], putative                                                                                                                                                                                                                                                                           | gi 40644804  | 28099.3 | 11.37 | 6  | 26  | 0   |     |        |
|    | 3  | Thylakoid-bound ascorbate peroxidase [Triticum aestivum]                                                                                                                                                                                                                                                             | gi 25992555  | 41301.8 | 5.48  | 6  | 25  | 0   | 9   | 0      |
| 80 | 4  | Annexin [Triticum aestivum]                                                                                                                                                                                                                                                                                          | gi 38606205  | 35416.1 | 9.01  | 7  | 24  | 0   |     |        |
|    | 5  | 60S ribosomal protein L5 [Triticum aestivum]                                                                                                                                                                                                                                                                         | gi 360042516 | 34441.8 | 9.29  | 3  | 24  | 0   | 15  | 41.284 |
|    | 6  | Non-tir-NBS-LRR resistance gene analog, partial [Triticum aestivum], putative                                                                                                                                                                                                                                        | gi 374683017 | 19459.2 | 7.77  | 5  | 22  | 0   |     |        |
|    | 7  | Ent-kaurene synthase like 1 [Triticum aestivum]                                                                                                                                                                                                                                                                      | gi 363987136 | 94528.2 | 5.60  | 6  | 22  | 0   | 13  | 2.107  |
|    | 8  | Glycosyltransferase, HGA-like [Triticum aestivum], putative,expressed                                                                                                                                                                                                                                                | gi 300681530 | 68832   | 6.38  | 9  | 22  | 0   |     |        |
|    | 9  | Zeta-carotene desaturase [Triticum aestivum]                                                                                                                                                                                                                                                                         | gi 336185123 | 62491   | 7.09  | 9  | 21  | 0   |     |        |
|    | 10 | Unknown protein [Triticum aestivum]                                                                                                                                                                                                                                                                                  | gi 374086126 | 34351.5 | 6.41  | 6  | 21  | 0   |     |        |
